# Supplementary material for: Oxidative cyanation of N-aryltetrahydroisoquinoline induced by visible light for the synthesis of α-aminonitrile using potassium thiocyanate as a “CN” agent
Source: Royal Society of Chemistry journal article supplement (doi:10.1039/c9ra06120g), 2019-01-01

## Supporting information

### **Oxidative cyanation of *N*-aryltetrahydroisoquinoline induced by visible light for the synthesis of $\alpha$ -aminonitrile using potassium thiocyanate as “CN” agent**

Bing Yi,\* Ning Yan, Niannian Yi,\* Yanjun Xie, Xiaoyong Wen, Chak-Tong Au,  
Donghui Lan

Hunan Province Key Laboratory of Environmental Catalysis and Waste Rechemistry,  
College of Chemistry and Chemical Engineering, Hunan Institute of Engineering,  
Xiangtan, 411104, P. R. China.

### Table of Contents

|                                                                                    |     |
|------------------------------------------------------------------------------------|-----|
| 1. General information.....                                                        | S1  |
| 2. General procedure for synthesis of <b>1</b> .....                               | S1  |
| 3. General procedure for synthesis of <b>3</b> .....                               | S6  |
| 4. Copies of <sup>1</sup> H and <sup>13</sup> C NMR spectra of all substrates..... | S14 |
| 5. Copies of <sup>1</sup> H and <sup>13</sup> C NMR spectra of all products.....   | S31 |

## General information

Commercially available reagents were used as received. All solvents were dried using 5Å molecular sieves. Chromatographic purification was performed by flash chromatography using silica gel (200-300 mesh). <sup>1</sup>H NMR and <sup>13</sup>C NMR spectra were recorded on a Bruker-AV instrument internally referenced to SiMe<sub>4</sub> and chloroform signals (400 MHz and 100 MHz, respectively). MS analyses were performed on a GCMS-QP 2010 Plus instrument (EI mode). All compounds were characterized by <sup>1</sup>H NMR, <sup>13</sup>C NMR, MS and micro melting point tester. The bulbs used were all from online suppliers.

## General procedure for the synthesis of 1

All substrates were synthesized by known methods<sup>[1]</sup>. Briefly, ethylene glycol (10 mmol, 0.6 mL), isopropanol (5 mL), 1,2,3,4-tetrahydroisoquinoline (5 mmol, 0.56 mL), iodobenzene (5 mmol), copper(I) iodide (0.5 mmol, 100 mg), potassium phosphate (10 mmol, 2.13 g) were added to a 50 mL Schlenk bottle, and the reaction was carried out at 90 °C for 24 h in a nitrogen atmosphere with magnetic stirring. After reaction completion, the content was cooled to room temperature and subject to extraction with ethyl acetate. The combined organic phases were washed with brine and dried over anhydrous Na<sub>2</sub>SO<sub>4</sub>. The crude product was purified by column chromatography using silica gel.

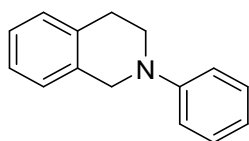

2-phenyl-1,2,3,4-tetrahydroisoquinoline (**1a**), <sup>1</sup>H NMR (400 MHz, Chloroform-*d*) δ 7.31 – 7.26 (m, 2H), 7.16 – 7.13 (m, 4H), 6.98 (dd, *J* = 8.5, 3.1 Hz, 2H), 6.82 (td, *J* = 7.3, 3.8 Hz, 1H), 4.40 (s, 2H), 3.55 (t, *J* = 5.4 Hz, 2H), 2.98 (t, *J* = 5.7 Hz, 2H). <sup>13</sup>C NMR (100 MHz, Chloroform-*d*) δ 150.5, 134.85, 134.4, 129.2, 128.5, 126.5, 126.3, 126.0, 118.63, 115.1, 50.7, 46.5, 29.1.

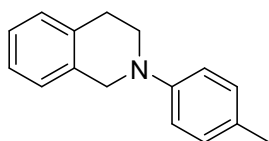

2-(p-tolyl)-1,2,3,4-tetrahydroisoquinoline (**1b**),  $^1\text{H}$  NMR (400 MHz, Chloroform-*d*)  $\delta$  7.18 – 7.08 (m, 6H), 6.91 (d,  $J = 8.3$  Hz, 2H), 4.34 (s, 2H), 3.50 (t,  $J = 5.8$  Hz, 2H), 2.97 (t,  $J = 5.9$  Hz, 2H), 2.27 (s, 3H).  $^{13}\text{C}$  NMR (100 MHz, Chloroform-*d*)  $\delta$  148.6, 134.7, 134.5, 129.7, 128.6, 128.4, 126.5, 126.2, 125.9, 115.8, 51.4, 47.2, 29.0, 20.4.

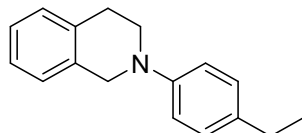

2-(4-ethylphenyl)-1,2,3,4-tetrahydroisoquinoline (**1c**),  $^1\text{H}$  NMR (400 MHz, Chloroform-*d*)  $\delta$  7.22 – 7.07 (m, 6H), 6.93 (d,  $J = 8.5$  Hz, 2H), 4.36 (s, 2H), 3.51 (t,  $J = 5.8$  Hz, 2H), 2.97 (t,  $J = 5.9$  Hz, 2H), 2.58 (q,  $J = 7.6$  Hz, 2H), 1.21 (t,  $J = 7.6$  Hz, 3H).  $^{13}\text{C}$  NMR (100 MHz, Chloroform-*d*)  $\delta$  148.8, 134.8, 134.8, 134.6, 128.6, 128.5, 126.5, 126.2, 125.9, 115.7, 51.4, 47.1, 29.1, 27.9, 15.8.

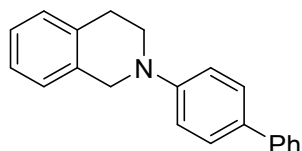

2-([1,1'-biphenyl]-4-yl)-1,2,3,4-tetrahydroisoquinoline (**1d**),  $^1\text{H}$  NMR (400 MHz, Chloroform-*d*)  $\delta$  7.57 – 7.51 (m, 4H), 7.41 – 7.37 (m, 2H), 7.28 – 7.15 (m, 5H), 7.05 – 7.00 (m, 2H), 4.45 (s, 2H), 3.59 (t,  $J = 5.9$  Hz, 2H), 2.99 (t,  $J = 5.8$  Hz, 2H).  $^{13}\text{C}$  NMR (100 MHz, Chloroform-*d*)  $\delta$  149.7, 141.0, 134.9, 134.3, 131.1, 128.7, 128.5, 127.8, 126.5, 126.4, 126.4, 126.2, 126.1, 115.0, 50.5, 46.2, 29.1.

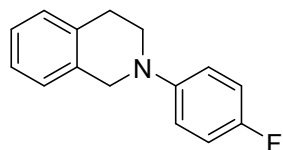

2-(4-fluorophenyl)-1,2,3,4-tetrahydroisoquinoline (**1e**),  $^1\text{H}$  NMR (400 MHz, Chloroform-*d*)  $\delta$  7.19 – 7.12 (m, 4H), 7.01 – 6.90 (m, 4H), 4.32 (s, 2H), 3.47 (t,  $J = 5.8$  Hz, 2H), 2.97 (t,  $J = 5.9$  Hz, 2H).  $^{13}\text{C}$  NMR (100 MHz, Chloroform-*d*)  $\delta$  156.7 (d,  $J = 236.0$  Hz), 147.3 (d,  $J = 1.0$  Hz), 134.5, 134.2, 128.6, 126.5, 126.3, 126.0, 117.1 (d,  $J = 7.0$  Hz), 115.6 (d,  $J = 22.0$  Hz), 51.9, 47.8, 29.0.

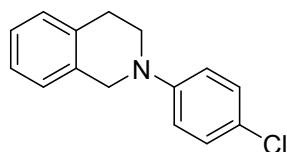

2-(4-chlorophenyl)-1,2,3,4-tetrahydroisoquinoline (**1f**),  $^1\text{H}$  NMR (400 MHz, Chloroform-*d*)  $\delta$  7.23 – 7.12 (m, 6H), 6.90 – 6.82 (m, 2H), 4.36 (s, 2H), 3.51 (t,  $J = 5.8$  Hz, 2H), 2.96 (t,  $J = 5.9$  Hz, 2H).  $^{13}\text{C}$  NMR (100 MHz, Chloroform-*d*)  $\delta$  149.0, 134.6, 134.0, 129.0, 128.5, 126.5, 126.4, 126.1, 123.2, 116.1, 50.6, 46.5, 28.9.

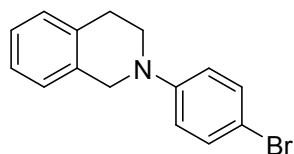

2-(4-bromophenyl)-1,2,3,4-tetrahydroisoquinoline (**1g**),  $^1\text{H}$  NMR (400 MHz, Chloroform-*d*)  $\delta$  7.40 – 7.28 (m, 2H), 7.24 – 7.04 (m, 4H), 6.87 – 6.75 (m, 2H), 4.36 (s, 2H), 3.52 (t,  $J = 5.9$  Hz, 2H), 2.96 (t,  $J = 5.8$  Hz, 2H).  $^{13}\text{C}$  NMR (100 MHz, Chloroform-*d*)  $\delta$  149.4, 134.7, 134.0, 131.9, 128.5, 126.5, 126.1, 116.4, 110.4, 50.4, 46.3, 28.9.

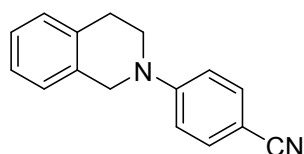

4-(3,4-dihydroisoquinolin-2(1H)-yl)benzotrile (**1h**),  $^1\text{H}$  NMR (400 MHz, Chloroform-*d*)  $\delta$  7.50 (d,  $J = 9.0$  Hz, 2H), 7.24 – 7.16 (m, 4H), 6.85 (d,  $J = 8.7$  Hz, 2H), 4.48 (s, 2H), 3.62 (t,  $J = 5.9$  Hz, 2H), 2.98 (t,  $J = 5.9$  Hz, 2H).  $^{13}\text{C}$  NMR (100 MHz, Chloroform-*d*)  $\delta$  152.1, 134.8, 133.5, 133.3, 128.1, 126.9, 126.5, 126.4, 120.4, 112.6, 98.5, 48.7, 44.5, 28.9.

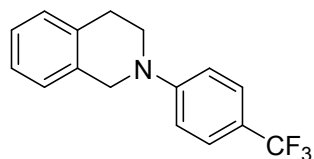

2-(4-(trifluoromethyl)phenyl)-1,2,3,4-tetrahydroisoquinoline (**1i**),  $^1\text{H}$  NMR (400 MHz, Chloroform-*d*)  $\delta$  7.49 (d,  $J = 8.7$  Hz, 2H), 7.22 – 7.15 (m, 4H), 6.91 (d,  $J = 8.6$  Hz, 2H), 4.45 (s, 2H), 3.60 (t,  $J = 5.9$  Hz, 2H), 2.97 (t,  $J = 5.9$  Hz, 2H).  $^{13}\text{C}$  NMR (100 MHz, Chloroform-*d*)  $\delta$  152.1, 134.9, 133.8, 128.3, 126.7, 126.5 (q,  $J = 4.0$  Hz), 126.3, 125.0 (q,  $J = 268.6$  Hz), 119.0 (q,  $J = 32.5$  Hz), 112.9, 49.4, 45.2, 28.9.

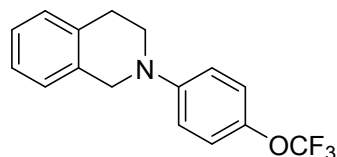

2-(4-(trifluoromethoxy)phenyl)-1,2,3,4-tetrahydroisoquinoline (**1j**),  $^1\text{H}$  NMR

(400 MHz, Chloroform-*d*)  $\delta$  7.20 – 7.12 (m, 6H), 6.94 – 6.86 (m, 2H), 4.38 (s, 2H), 3.53 (t,  $J = 5.9$  Hz, 2H), 2.97 (t,  $J = 5.9$  Hz, 2H).  $^{13}\text{C}$  NMR (100 MHz, Chloroform-*d*)  $\delta$  149.2, 141.1 (d,  $J = 1.0$  Hz), 134.7, 134.0, 128.5, 126.5, 126.2, 122.1, 118.2 (q,  $J = 253.7$  Hz), 115.3, 50.6, 46.5, 29.0.

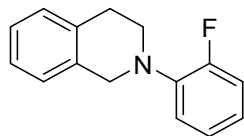

2-(2-fluorophenyl)-1,2,3,4-tetrahydroisoquinoline (**1k**),  $^1\text{H}$  NMR (400 MHz, Chloroform-*d*)  $\delta$  7.17 – 7.11 (m, 3H), 7.11 – 6.95 (m, 4H), 6.94 – 6.89 (m, 1H), 4.29 (s, 2H), 3.43 (t,  $J = 5.9$  Hz, 2H), 2.97 (t,  $J = 5.9$  Hz, 2H).  $^{13}\text{C}$  NMR (100 MHz, Chloroform-*d*)  $\delta$  155.7 (d,  $J = 244.0$  Hz), 139.8 (d,  $J = 9.0$  Hz), 134.4, 134.4, 128.9, 126.3, 126.3, 125.9, 124.4 (d,  $J = 3.0$  Hz), 122.2 (d,  $J = 8.0$  Hz), 119.4 (d,  $J = 3.0$  Hz), 116.1 (d,  $J = 21.0$  Hz), 52.6 (d,  $J = 2.0$  Hz), 48.9 (d,  $J = 5.0$  Hz), 28.9.

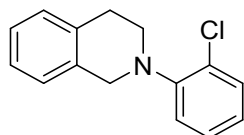

2-(2-chlorophenyl)-1,2,3,4-tetrahydroisoquinoline (**1l**),  $^1\text{H}$  NMR (400 MHz, Chloroform-*d*)  $\delta$  7.38 (d,  $J = 7.9$  Hz, 1H), 7.21 – 7.07 (m, 6H), 6.97 (t,  $J = 7.6$  Hz, 1H), 4.26 (s, 2H), 3.38 (t,  $J = 5.6$  Hz, 2H), 3.01 (t,  $J = 5.7$  Hz, 2H).  $^{13}\text{C}$  NMR (100 MHz, Chloroform-*d*)  $\delta$  149.1, 134.7, 134.5, 130.7, 128.9, 128.8, 127.5, 126.3, 126.3, 125.8, 123.6, 120.6, 53.2, 49.9, 29.1.

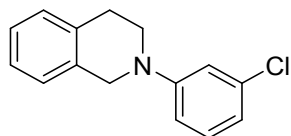

2-(3-chlorophenyl)-1,2,3,4-tetrahydroisoquinoline (**1m**),  $^1\text{H}$  NMR (400 MHz, Chloroform-*d*)  $\delta$  7.18 – 7.10 (m, 5H), 6.88 (t,  $J = 2.1$  Hz, 1H), 6.78 – 6.73 (m, 2H), 4.35 (s, 2H), 3.49 (t,  $J = 5.9$  Hz, 2H), 2.93 (t,  $J = 5.9$  Hz, 2H).  $^{13}\text{C}$  NMR (100 MHz, Chloroform-*d*)  $\delta$  151.3, 135.0, 134.7, 133.9, 130.0, 128.3, 126.4, 126.1, 117.9, 114.3, 112.5, 49.9, 45.8, 29.0.

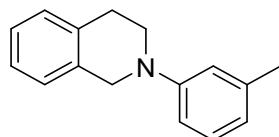

2-(*m*-tolyl)-1,2,3,4-tetrahydroisoquinoline (**1n**), <sup>1</sup>H NMR (400 MHz, Chloroform-*d*) δ 7.21 – 7.11 (m, 5H), 6.79 (d, *J* = 8.1 Hz, 2H), 6.65 (d, *J* = 7.4 Hz, 1H), 4.38 (s, 2H), 3.53 (t, *J* = 5.8 Hz, 2H), 2.96 (t, *J* = 5.8 Hz, 2H), 2.33 (s, 3H). <sup>13</sup>C NMR (101 MHz, Chloroform-*d*) δ 150.6, 138.8, 134.9, 134.5, 129.0, 128.5, 126.5, 126.2, 125.9, 119.6, 115.9, 112.3, 50.8, 46.5, 29.2, 21.8.

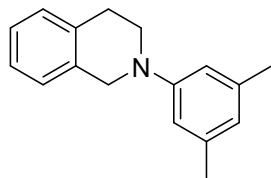

2-(3,5-dimethylphenyl)-1,2,3,4-tetrahydroisoquinoline (**1o**), <sup>1</sup>H NMR (400 MHz, Chloroform-*d*) δ 7.19 – 7.12 (m, 4H), 6.62 (s, 2H), 6.50 (s, 1H), 4.37 (s, 2H), 3.52 (t, *J* = 5.8 Hz, 2H), 2.97 (t, *J* = 5.8 Hz, 2H), 2.30 (s, 6H). <sup>13</sup>C NMR (100 MHz, Chloroform-*d*) δ 150.7, 138.7, 134.9, 134.6, 128.5, 126.5, 126.2, 125.9, 120.7, 113.1, 50.9, 46.6, 29.3, 21.7.

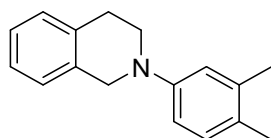

2-(3,4-dimethylphenyl)-1,2,3,4-tetrahydroisoquinoline (**1p**), <sup>1</sup>H NMR (400 MHz, Chloroform-*d*) δ 7.22 – 7.10 (m, 4H), 7.04 (d, *J* = 8.2 Hz, 1H), 6.82 (d, *J* = 2.6 Hz, 1H), 6.76 (dd, *J* = 8.3, 2.6 Hz, 1H), 4.34 (s, 2H), 3.49 (t, *J* = 5.9 Hz, 2H), 2.97 (t, *J* = 5.9 Hz, 2H), 2.25 (s, 3H), 2.19 (s, 3H). <sup>13</sup>C NMR (100 MHz, Chloroform-*d*) δ 149.1, 137.1, 134.7, 134.6, 130.2, 128.6, 127.2, 126.5, 126.2, 125.87, 117.5, 113.3, 51.5, 47.3, 29.2, 20.3, 18.7.

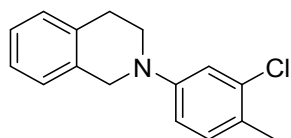

2-(3-chloro-4-methylphenyl)-1,2,3,4-tetrahydroisoquinoline (**1q**), <sup>1</sup>H NMR (400 MHz, Chloroform-*d*) δ 7.20 – 7.05 (m, 5H), 6.94 (d, *J* = 2.6 Hz, 1H), 6.76 (dd, *J* = 8.4, 2.6 Hz, 1H), 4.33 (s, 2H), 3.48 (t, *J* = 5.8 Hz, 2H), 2.95 (t, *J* = 5.8 Hz, 2H), 2.27 (s, 3H). <sup>13</sup>C NMR (100 MHz, Chloroform-*d*) δ 149.6, 134.8, 134.6, 134.1, 131.1, 128.5, 126.5, 126.4, 126.1, 125.5, 115.5, 113.6, 50.7, 46.5, 29.0, 18.9.

## General procedure for the synthesis of **3**

*N*-Aryltetrahydroisoquinoline (0.2 mmol), potassium thiocyanate (0.1 mmol, 9.75 mg), and acetonitrile (1.5 mL) were added to a round bottom flask of 10 mL equipped with a small polytetrafluoroethylene magnet stirrer. Then the round bottom flask was sealed with a rubber plug that was fixed with inlet and outlet tubes for thorough removal of air and introduction of O<sub>2</sub> (three times). The round bottom flask with its content was then properly sealed and placed under purple LEDs irradiation (30 W) with magnetic stirring for 24 h. After reaction completion, the content was filtered through a sand core funnel. The filtrate was concentrated and purified by silica gel column chromatography to obtain the corresponding product using a mixture of petroleum ether and ethyl acetate as eluent.

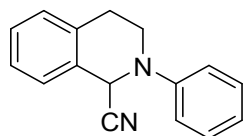

2-phenyl-1,2,3,4-tetrahydroisoquinoline-1-carbonitrile (**3a**)<sup>[2, 3-5]</sup>, white solid, m.p. 99-100 °C, 92% yield (21.5 mg). <sup>1</sup>H NMR (400 MHz, Chloroform-*d*) δ 7.35 – 7.30 (m, 2H), 7.28 – 7.16 (m, 4H), 7.04 (d, *J* = 7.9 Hz, 2H), 7.00 – 6.95 (m, 1H), 5.47 (s, 1H), 3.74 – 3.68 (m, 1H), 3.40 (ddd, *J* = 12.4, 10.7, 4.0 Hz, 1H), 3.12 – 3.04 (m, 1H), 2.88 (dt, *J* = 16.3, 3.5 Hz, 1H). <sup>13</sup>C NMR (100 MHz, Chloroform-*d*) δ 148.1, 134.4, 129.4, 129.3, 129.2, 128.6, 126.9, 126.7, 121.7, 117.7, 117.3, 52.9, 43.9, 28.3. MS (EI) *m/z* (%) 234.00, 206.00, 181.00, 129.00, 105.00 (100), 77.00, 51.00.

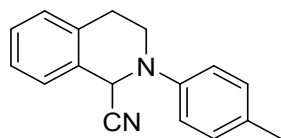

2-(*p*-tolyl)-1,2,3,4-tetrahydroisoquinoline-1-carbonitrile (**3b**)<sup>[3-5]</sup>, white solid, m.p. 117-118 °C, 79% yield (19.6 mg). <sup>1</sup>H NMR (400 MHz, Chloroform-*d*) δ 7.32 – 7.21 (m, 4H), 7.16 (d, *J* = 8.2 Hz, 2H), 7.00 (d, *J* = 8.5 Hz, 2H), 5.45 (s, 1H), 3.72 – 3.67 (m, 1H), 3.43 (ddd, *J* = 12.3, 11.1, 4.0 Hz, 1H), 3.19 – 3.11 (m, 1H), 2.93 (dt, *J* = 16.3, 3.1 Hz, 1H), 2.31 (s, 3H). <sup>13</sup>C NMR (100 MHz, Chloroform-*d*) δ 146.2, 134.5, 131.8, 130.0, 129.5, 129.3, 128.6, 127.0, 126.7, 118.3, 117.7, 54.1, 44.3, 28.5, 20.6. MS (EI) *m/z* (%) 248.05, 220.00 (100), 204.00, 119.05, 91.00, 65.00, 51.00.

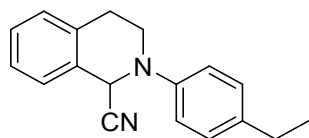

2-(4-ethylphenyl)-1,2,3,4-tetrahydroisoquinoline-1-carbonitrile (**3c**)<sup>[3]</sup>, white solid, m.p. 133-134 °C, 86% yield (22.5 mg). <sup>1</sup>H NMR (400 MHz, Chloroform-*d*) δ 7.32 – 7.25 (m, 3H), 7.23 – 7.18 (m, 3H), 7.05 – 7.02 (m, 2H), 5.46 (s, 1H), 3.74 – 3.68 (m, 1H), 3.44 (ddd, *J* = 12.2, 11.0, 4.0 Hz, 1H), 3.19 – 3.10 (m, 1H), 2.94 (dt, *J* = 16.3, 2.8 Hz, 1H), 2.61 (q, *J* = 7.5 Hz, 2H), 1.22 (t, *J* = 7.6 Hz, 3H). <sup>13</sup>C NMR (100 MHz, Chloroform-*d*) δ 146.3, 138.1, 134.5, 129.6, 129.3, 128.9, 128.6, 127.0, 126.7, 118.2, 117.7, 53.9, 44.3, 28.5, 28.0, 15.7. MS (EI) *m/z* (%) 262.05, 234.05 (100), 219.00, 204.00, 133.05, 103.00, 77.00, 51.00.

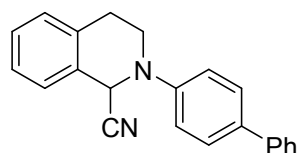

2-([1,1'-biphenyl]-4-yl)-1,2,3,4-tetrahydroisoquinoline-1-carbonitrile (**3d**)<sup>[3]</sup>, white solid, m.p. 169-170 °C, 62% yield (19.2 mg). <sup>1</sup>H NMR (400 MHz, Chloroform-*d*) δ 7.58 (t, *J* = 8.9 Hz, 4H), 7.42 (t, *J* = 7.5 Hz, 2H), 7.35 – 7.23 (m, 5H), 7.14 (d, *J* = 8.5 Hz, 2H), 5.56 (s, 1H), 3.85 – 3.80 (m, 1H), 3.52 (ddd, *J* = 12.0, 11.1, 3.9 Hz, 1H), 3.21 – 3.13 (m, 1H), 2.98 (dt, *J* = 16.3, 3.6 Hz, 1H). <sup>13</sup>C NMR (100 MHz, Chloroform-*d*) δ 147.5, 140.5, 134.6, 134.5, 129.4, 129.3, 128.8, 128.7, 128.2, 127.0, 126.9, 126.8, 126.7, 117.7, 117.5, 52.9, 44.2, 28.5. MS (EI) *m/z* (%) 310.05, 284.05 (100), 265.00, 204.00, 180.05, 141.00, 128.00, 103.00, 77.00, 51.00.

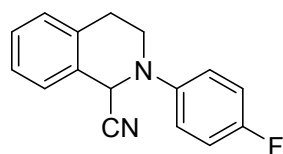

2-(4-fluorophenyl)-1,2,3,4-tetrahydroisoquinoline-1-carbonitrile (**3e**)<sup>[2, 3-4]</sup>, white solid, m.p. 124-125 °C, 76% yield (19.2 mg). <sup>1</sup>H NMR (400 MHz, Chloroform-*d*) δ 7.32 – 7.22 (m, 4H), 7.07 (d, *J* = 6.1 Hz, 4H), 5.40 (s, 1H), 3.62 (dd, *J* = 11.9, 5.5 Hz, 1H), 3.44 (td, *J* = 11.7, 3.9 Hz, 1H), 3.20 – 3.12 (m, 1H), 2.95 (dt, *J* = 16.6, 3.2 Hz, 1H). <sup>13</sup>C NMR (100 MHz, Chloroform-*d*) δ 158.5 (d, *J* = 240.0 Hz), 145.0 (d, *J* = 2.4 Hz), 134.2, 129.4, 129.3, 128.8, 127.0, 126.8, 120.4 (d, *J* = 8.0 Hz), 117.4, 116.1 (d, *J* = 23.0 Hz), 54.7, 44.7, 28.5. MS (EI) *m/z* (%) 252.00, 224.00, 199.00, 129.05 (100),



95.00, 75.00, 51.00.

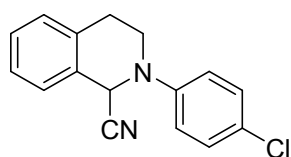

2-(4-chlorophenyl)-1,2,3,4-tetrahydroisoquinoline-1-carbonitrile (**3f**)<sup>[2, 4-5]</sup>, white solid, m.p. 152-153 °C, 83% yield (22.2 mg). <sup>1</sup>H NMR (400 MHz, Chloroform-*d*) δ 7.34 – 7.28 (m, 5H), 7.24 (d, *J* = 7.7 Hz, 1H), 7.01 (d, *J* = 8.6 Hz, 2H), 5.46 (s, 1H), 3.73 – 3.68 (m, 1H), 3.46 (td, *J* = 11.5, 4.0 Hz, 1H), 3.19 – 3.11 (m, 1H), 2.97 (dt, *J* = 16.3, 3.2 Hz, 1H). <sup>13</sup>C NMR (100 MHz, Chloroform-*d*) δ 146.9, 134.3, 129.5, 129.3, 129.2, 128.9, 127.0, 126.9, 118.8, 117.4, 53.1, 44.3, 28.4. MS (EI) *m/z* (%) 268.00, 240.00 (100), 204.00, 165.05, 139.00, 129.05, 102.05, 75.00, 51.00.

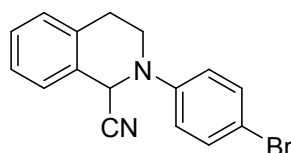

2-(4-bromophenyl)-1,2,3,4-tetrahydroisoquinoline-1-carbonitrile (**3g**)<sup>[2,3-4]</sup>, white solid, m.p. 155-156 °C, 61% yield (19 mg). <sup>1</sup>H NMR (400 MHz, Chloroform-*d*) δ 7.47 – 7.43 (m, 2H), 7.34 – 7.23 (m, 4H), 6.97 – 6.93 (m, 2H), 5.46 (s, 1H), 3.74 – 3.68 (m, 1H), 3.46 (ddd, *J* = 12.3, 10.7, 4.1 Hz, 1H), 3.19 – 3.10 (m, 1H), 2.97 (dt, *J* = 16.3, 3.6 Hz, 1H). <sup>13</sup>C NMR (100 MHz, Chloroform-*d*) δ 147.3, 134.4, 132.4, 129.3, 129.1, 128.9, 127.0, 126.9, 119.0, 117.4, 114.3, 52.8, 44.2, 28.4. MS (EI) *m/z* (%) 311.95, 285.95, 206.00, 182.90, 154.90, 129.00 (100), 102.00, 76.00, 51.00.

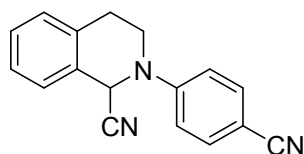

2-(4-cyanophenyl)-1,2,3,4-tetrahydroisoquinoline-1-carbonitrile (**3h**)<sup>[6]</sup>, white solid, m.p. 155-156 °C, 83% yield (21.5 mg). <sup>1</sup>H NMR (400 MHz, Chloroform-*d*) δ 7.60 (dd, *J* = 8.8, 1.7 Hz, 2H), 7.39 – 7.26 (m, 4H), 7.02 (dd, *J* = 8.7, 1.6 Hz, 2H), 5.60 (s, 1H), 3.91 – 3.78 (m, 1H), 3.63 – 3.56 (m, 1H), 3.19 – 3.07 (m, 2H). <sup>13</sup>C NMR (100 MHz, Chloroform-*d*) δ 150.5, 134.6, 133.8, 129.3, 129.0, 128.7, 127.3, 126.9, 119.4, 117.3, 114.6, 102.4, 50.0, 43.7, 28.1. MS (EI) *m/z* (%) 259.05, 231.05, 190.5, 129.05 (100), 102.05, 77.00, 51.00.

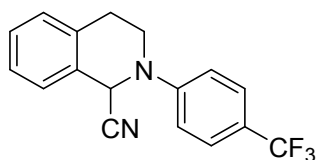

2-(4-(trifluoromethyl)phenyl)-1,2,3,4-tetrahydroisoquinoline-1-carbonitrile (**3i**)<sup>[4,5]</sup>, white solid, m.p. 102-103 °C, 88% yield (26.6 mg). <sup>1</sup>H NMR (400 MHz, Chloroform-*d*) δ 7.58 (d, *J* = 8.6 Hz, 2H), 7.35 – 7.23 (m, 4H), 7.07 (d, *J* = 8.5 Hz, 2H), 5.57 (s, 1H), 3.83 (dt, *J* = 12.4, 5.0 Hz, 1H), 3.53 (ddd, *J* = 12.6, 9.6, 4.4 Hz, 1H), 3.18 – 3.10 (m, 1H), 3.02 (dt, *J* = 16.2, 4.2 Hz, 1H). <sup>13</sup>C NMR (100 MHz, Chloroform-*d*) δ 150.2, 134.5, 129.2, 129.1, 128.93, 127.1, 127.0, 126.8 (q, *J* = 3.6 Hz), 124.4 (q, *J* = 269.3 Hz), 122.4 (q, *J* = 32.7 Hz), 117.5, 115.2, 51.1, 43.8, 28.2. MS (EI) *m/z* (%) 302.00, 274.00, 172.00, 145.00, 129.05 (100), 102.00, 77.00, 51.00.

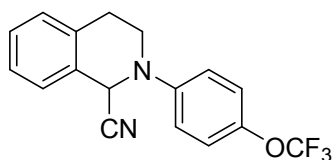

2-(4-(trifluoromethoxy)phenyl)-1,2,3,4-tetrahydroisoquinoline-1-carbonitrile (**3j**)<sup>[2]</sup>, white solid, m.p. 83-84 °C, 81% yield (25.8 mg). <sup>1</sup>H NMR (400 MHz, Chloroform-*d*) δ 7.34 – 7.20 (m, 6H), 7.07 (d, *J* = 8.9 Hz, 2H), 5.47 (s, 1H), 3.75 – 3.70 (m, 1H), 3.48 (td, *J* = 12.0, 11.4, 4.0 Hz, 1H), 3.19 – 3.11 (m, 1H), 2.98 (dt, *J* = 16.3, 3.3 Hz, 1H). <sup>13</sup>C NMR (100 MHz, Chloroform-*d*) δ 147.0, 143.5 (d, *J* = 1.7 Hz), 134.3, 129.3, 129.1, 128.9, 127.0 (d, *J* = 3.3 Hz), 122.4, 120.5 (q, *J* = 254.9 Hz) 118.4, 117.4, 53.1, 44.4, 28.4. MS (EI) *m/z* (%) 318.05, 290.00, 265.00, 233.00, 208.00, 189.00, 161.00, 129.05 (100), 90.00, 77.00, 51.00.

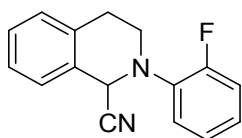

2-(2-fluorophenyl)-1,2,3,4-tetrahydroisoquinoline-1-carbonitrile (**3k**)<sup>[2,4]</sup>, colorless oily liquid, 77% yield (19.4 mg). <sup>1</sup>H NMR (400 MHz, Chloroform-*d*) δ 7.33 – 7.28 (m, 1H), 7.26 – 7.15 (m, 5H), 7.13 – 7.09 (m, 2H), 5.48 (s, 1H), 3.59 – 3.48 (m, 2H), 3.26 – 3.17 (m, 1H), 2.91 (dt, *J* = 16.7, 2.2 Hz, 1H). <sup>13</sup>C NMR (100 MHz, Chloroform-*d*) δ 156.0 (d, *J* = 245.0 Hz), 136.8 (d, *J* = 9.0 Hz), 133.9, 129.5, 129.2, 128.7, 127.0, 126.7, 125.0 (d, *J* = 3.0 Hz), 124.9, 121.4 (d, *J* = 2.0 Hz), 117.4, 116.4 (d, *J* = 20.0 Hz), 53.8, 53.8, 44.7, 28.5. MS (EI) *m/z* (%) 252.00, 224.00, 199.00,

129.05 (100), 102.00, 77.00, 51.00.

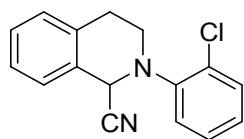

2-(2-chlorophenyl)-1,2,3,4-tetrahydroisoquinoline-1-carbonitrile (**3l**)<sup>[2, 4]</sup>, white solid, m.p. 115-116 °C, 63% yield (16.9 mg). <sup>1</sup>H NMR (400 MHz, Chloroform-*d*) δ 7.42 (d, *J* = 7.9 Hz, 1H), 7.34 – 7.28 (m, 3H), 7.26 – 7.21 (m, 3H), 7.15 – 7.11 (m, 1H), 5.53 (s, 1H), 3.61 (td, *J* = 11.9, 3.7 Hz, 1H), 3.45 (dd, *J* = 11.9, 6.3 Hz, 1H), 3.29 – 3.20 (m, 1H), 2.91 (dd, *J* = 16.4, 2.7 Hz, 1H). <sup>13</sup>C NMR (100 MHz, Chloroform-*d*) δ 145.9, 134.1, 130.7, 129.7, 129.6, 129.4, 128.8, 128.2, 127.1, 126.7, 126.1, 123.2, 117.4, 53.9, 45.6, 28.8. MS (EI) *m/z* (%) 268.00, 239.95, 222.00, 203.95, 139.00, 129.05, (100), 102.00, 77.00, 51.00.

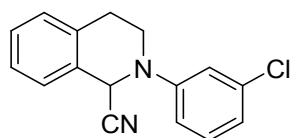

2-(3-chlorophenyl)-1,2,3,4-tetrahydroisoquinoline-1-carbonitrile (**3m**)<sup>[2,4]</sup>, colorless oily liquid, 67% yield (18 mg). <sup>1</sup>H NMR (400 MHz, Chloroform-*d*) δ 7.35 – 7.23 (m, 5H), 7.03 (t, *J* = 2.0 Hz, 1H), 6.98 – 6.92 (m, 2H), 5.49 (s, 1H), 3.78 – 3.72 (m, 1H), 3.48 (ddd, *J* = 12.4, 10.4, 4.2 Hz, 1H), 3.18 – 3.10 (m, 1H), 2.99 (dt, *J* = 16.3, 3.8 Hz, 1H). <sup>13</sup>C NMR (100 MHz, Chloroform-*d*) δ 149.3, 135.3, 134.4, 130.5, 129.3, 129.1, 128.9, 127.0, 127.0, 121.4, 117.5, 117.1, 114.9, 52.3, 44.0, 28.3. MS (EI) *m/z* (%) 268.00, 239.95, 204.00, 165.00, 139.00, 129.05 (100), 102.00, 75.00, 51.00.

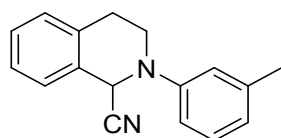

2-(*m*-tolyl)-1,2,3,4-tetrahydroisoquinoline-1-carbonitrile (**3n**)<sup>[2, 4-5]</sup>, colorless oily liquid, 47% yield (11.6 mg). <sup>1</sup>H NMR (400 MHz, Chloroform-*d*) δ 7.33 – 7.22 (m, 5H), 6.90 – 6.88 (m, 2H), 6.84 (d, *J* = 7.6 Hz, 1H), 5.51 (s, 1H), 3.79 – 3.73 (m, 1H), 3.46 (ddd, *J* = 12.3, 10.8, 4.0 Hz, 1H), 3.19 – 3.11 (m, 1H), 2.96 (dt, *J* = 16.3, 3.2 Hz, 1H), 2.37 (s, 3H). <sup>13</sup>C NMR (100 MHz, Chloroform-*d*) δ 148.4, 139.4, 134.6, 129.7, 129.4, 129.3, 128.7, 127.0, 126.8, 122.8, 118.4, 117.8, 114.7, 53.3, 44.1, 28.6, 21.7. MS (EI) *m/z* (%) 248.00, 220.00, 119.00 (100), 204.00, 178.00, 91.00, 65.00, 51.00.

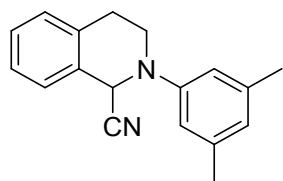

2-(3,5-dimethylphenyl)-1,2,3,4-tetrahydroisoquinoline-1-carbonitrile (**3o**), colorless oily liquid, 66% yield (17.3 mg).  $^1\text{H}$  NMR (400 MHz, Chloroform-*d*)  $\delta$  7.32 – 7.21 (m, 4H), 6.68 (d,  $J = 14.1$  Hz, 3H), 5.50 (s, 1H), 3.78 – 3.72 (m, 1H), 3.44 (ddd,  $J = 12.3, 11.1, 4.0$  Hz, 1H), 3.18 – 3.10 (m, 1H), 2.94 (dt,  $J = 16.3, 3.1$  Hz, 1H), 2.32 (s, 6H).  $^{13}\text{C}$  NMR (100 MHz, Chloroform-*d*)  $\delta$  148.5, 139.1, 134.7, 129.8, 129.3, 128.6, 127.0, 126.8, 123.8, 117.8, 115.5, 53.4, 44.1, 28.6, 21.6. MS (EI)  $m/z$  (%) 262.05, 234.05 (100), 218.00, 133.05, 103.00, 77.00, 51.00.

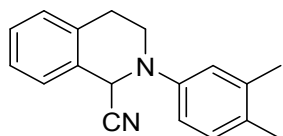

2-(3,4-dimethylphenyl)-1,2,3,4-tetrahydroisoquinoline-1-carbonitrile (**3p**)<sup>[2]</sup>, white solid, m.p. 145-146 °C, 60% yield (15.7 mg).  $^1\text{H}$  NMR (400 MHz, Chloroform-*d*)  $\delta$  7.31 – 7.21 (m, 4H), 7.11 (d,  $J = 8.1$  Hz, 1H), 6.90 – 6.83 (m, 2H), 5.46 (s, 1H), 3.73 – 3.67 (m, 1H), 3.43 (ddd,  $J = 12.3, 11.0, 4.0$  Hz, 1H), 3.19 – 3.11 (m, 1H), 2.93 (dt,  $J = 16.3, 3.0$  Hz, 1H), 2.27 (s, 3H), 2.22 (s, 3H).  $^{13}\text{C}$  NMR (100 MHz, Chloroform-*d*)  $\delta$  146.6, 137.7, 134.5, 130.5, 129.7, 129.4, 128.6, 127.1, 126.7, 119.8, 117.7, 115.6, 54.1, 44.3, 28.6, 20.2, 18.9. MS (EI)  $m/z$  (%) 262.05, 234.00 (100), 218.00, 133.05, 105.05, 77.00, 51.00.

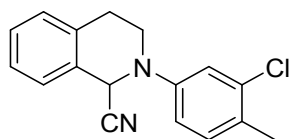

2-(3-chloro-4-methylphenyl)-1,2,3,4-tetrahydroisoquinoline-1-carbonitrile (**3q**)<sup>[2]</sup>, white solid, m.p. 128-129 °C, 80% yield (22.6 mg).  $^1\text{H}$  NMR (400 MHz, Chloroform-*d*)  $\delta$  7.32 – 7.18 (m, 5H), 7.07 (d,  $J = 2.6$  Hz, 1H), 6.88 (dd,  $J = 8.3, 2.6$  Hz, 1H), 5.45 (s, 1H), 3.73 – 3.67 (m, 1H), 3.44 (ddd,  $J = 12.3, 10.7, 4.1$  Hz, 1H), 3.18 – 3.10 (m, 1H), 2.96 (dt,  $J = 16.3, 3.3$  Hz, 1H), 2.32 (s, 3H).  $^{13}\text{C}$  NMR (100 MHz, Chloroform-*d*)  $\delta$  147.4, 135.2, 134.4, 131.6, 129.3, 129.3, 129.3, 128.8, 127.0, 126.9, 118.4, 117.4, 116.0, 53.2, 44.2, 28.4, 19.1. MS (EI)  $m/z$  (%) 282.00, 254.00 (100), 247.00, 218.00,

178.05, 153.00, 129.00, 89.00, 77.00, 51.00.

## References

- [1] Kwong, F. Y.; Klapars, A.; Buchwald, S. L. *Org. Lett.* **2002**, *4*, 581.
- [2] Zhang, G.; Ma, Y. X.; Cheng, G. B.; Liu, D. B.; Wang, R. *Org. Lett.* **2014**, *16*, 656.
- [3] Rueping, M.; Zhu, S.; Koenigs, R. M. *Chem. Commun.* **2011**, *47*, 12709.
- [4] Yang, R.; Ruan, Q.; Zhang, B. Y.; Zheng, Z. L.; Miao, F.; Zhou, L.; Geng, H. L. *Molecules.* **2014**, *19*, 8051.
- [5] Ide, T.; Shimizu, K.; Egami, H.; Hamashima, Y. *Tetrahedron Lett.* **2018**, *59*, 3258.
- [6] Patil, M. R.; Dedhia, N. P.; Kapdi, A. R.; Kumar, A.V. *J. Org. Chem.* **2018**, *83*, 4477.

# Copies of $^1\text{H}$ and $^{13}\text{C}$ NMR spectra of all substrates

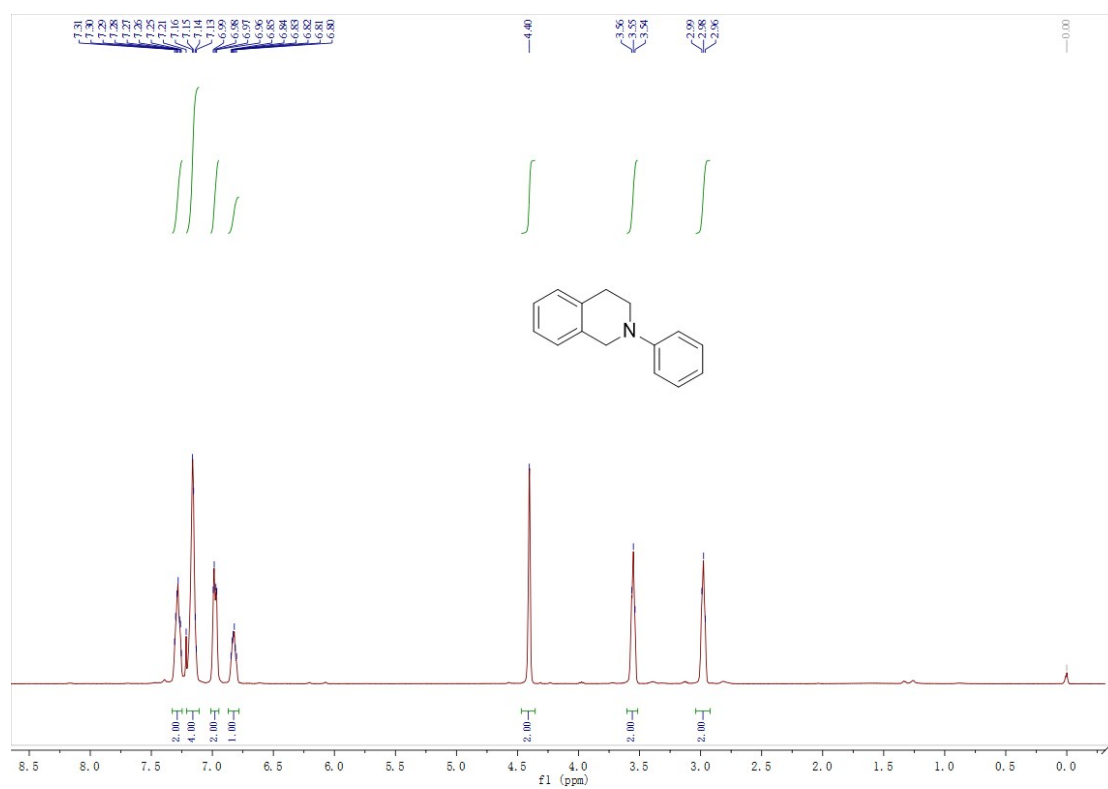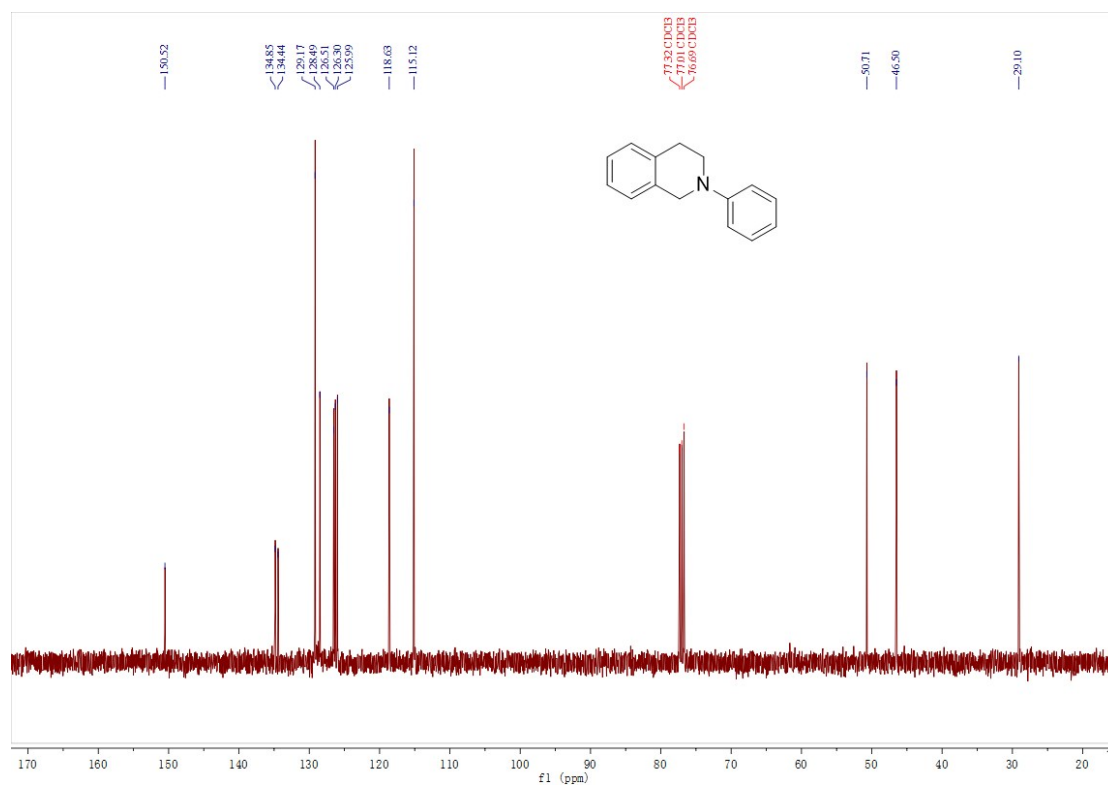

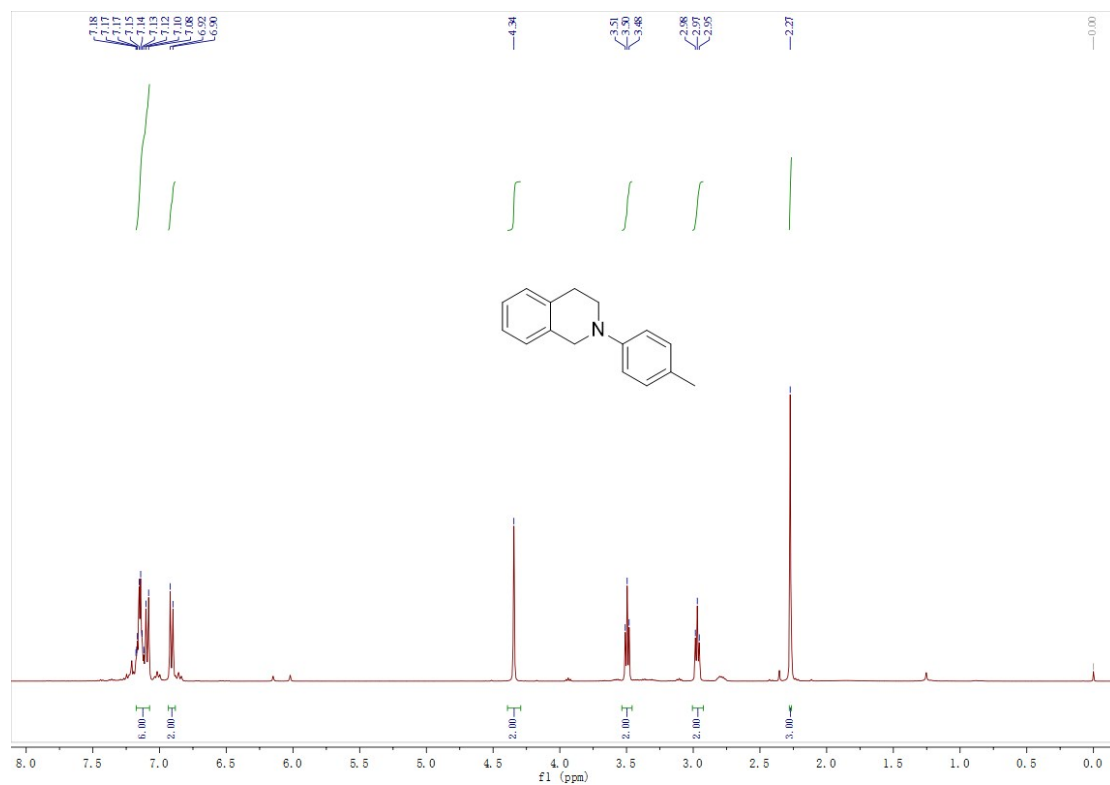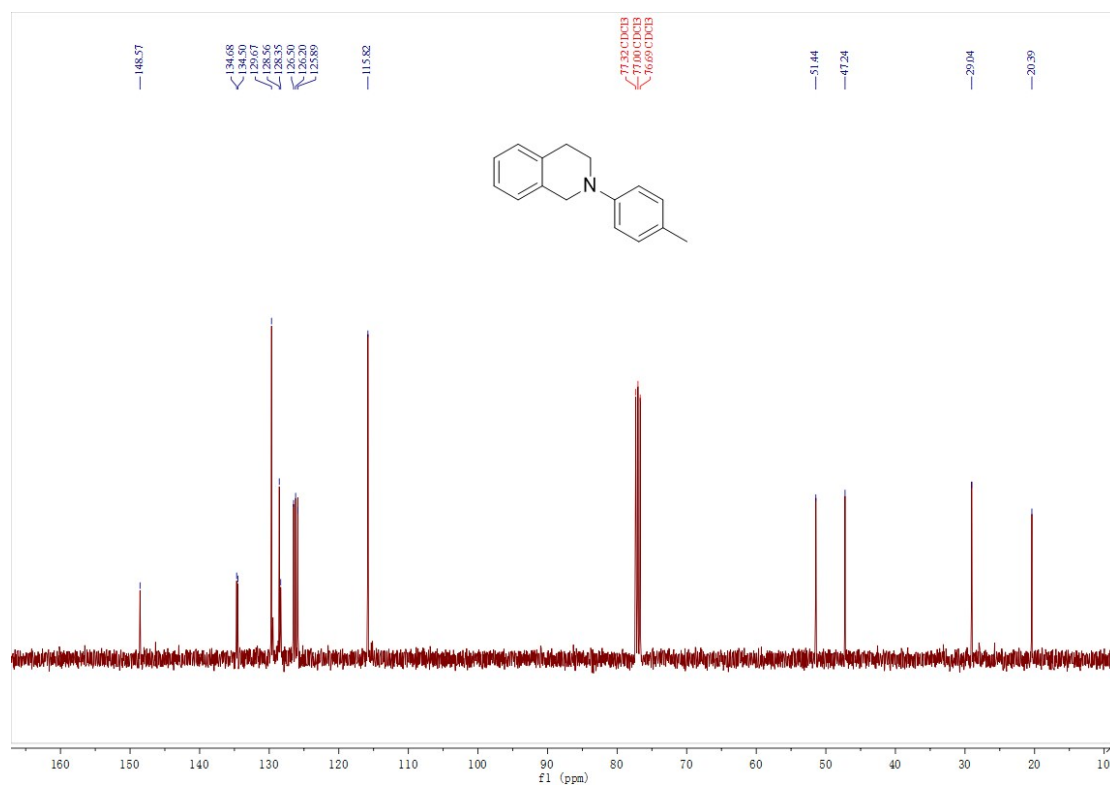



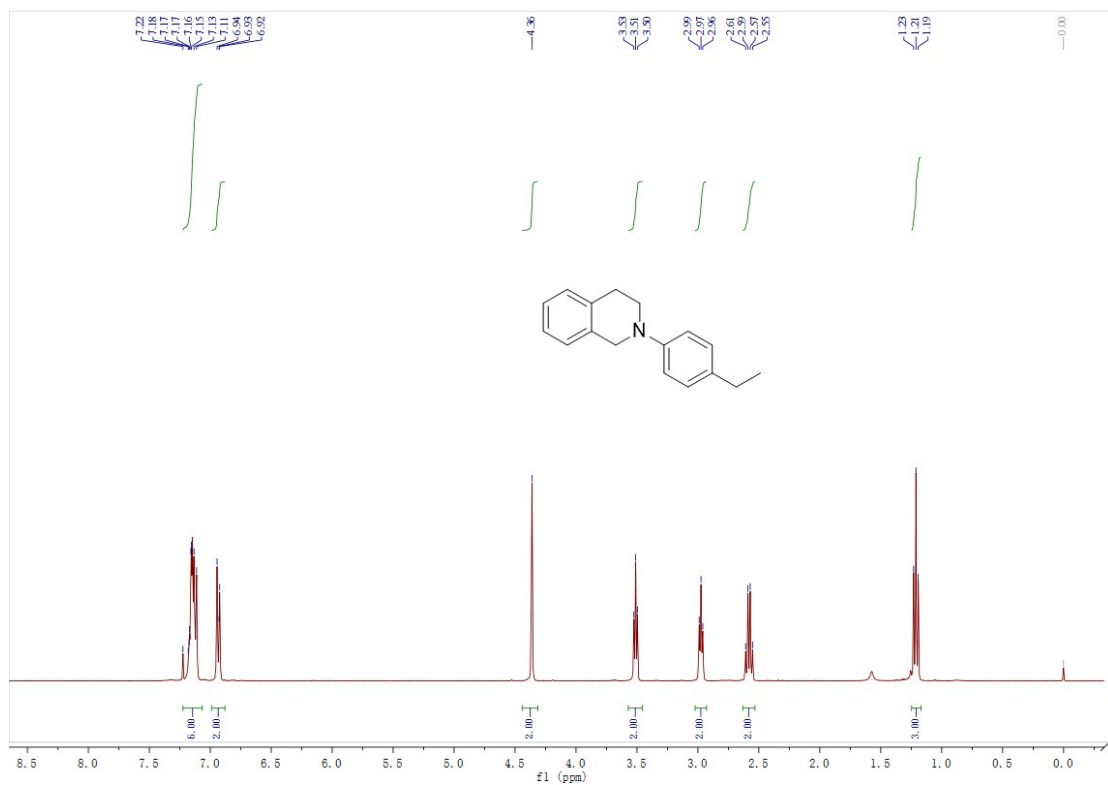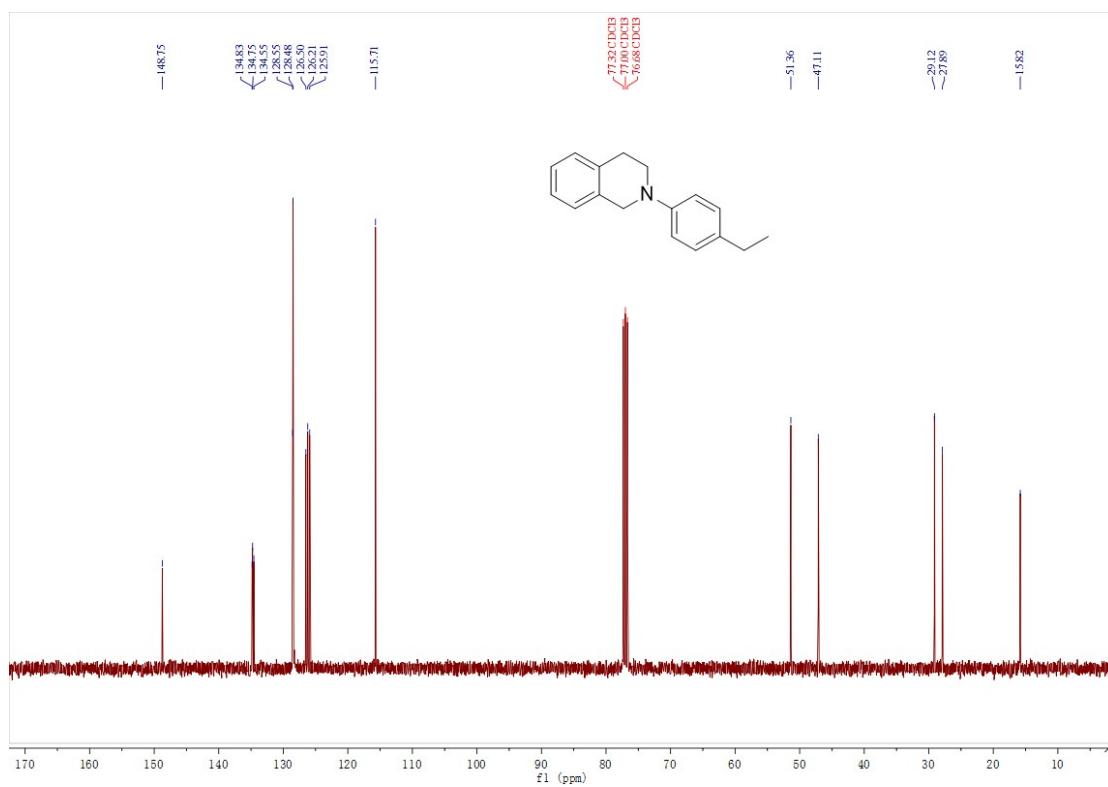

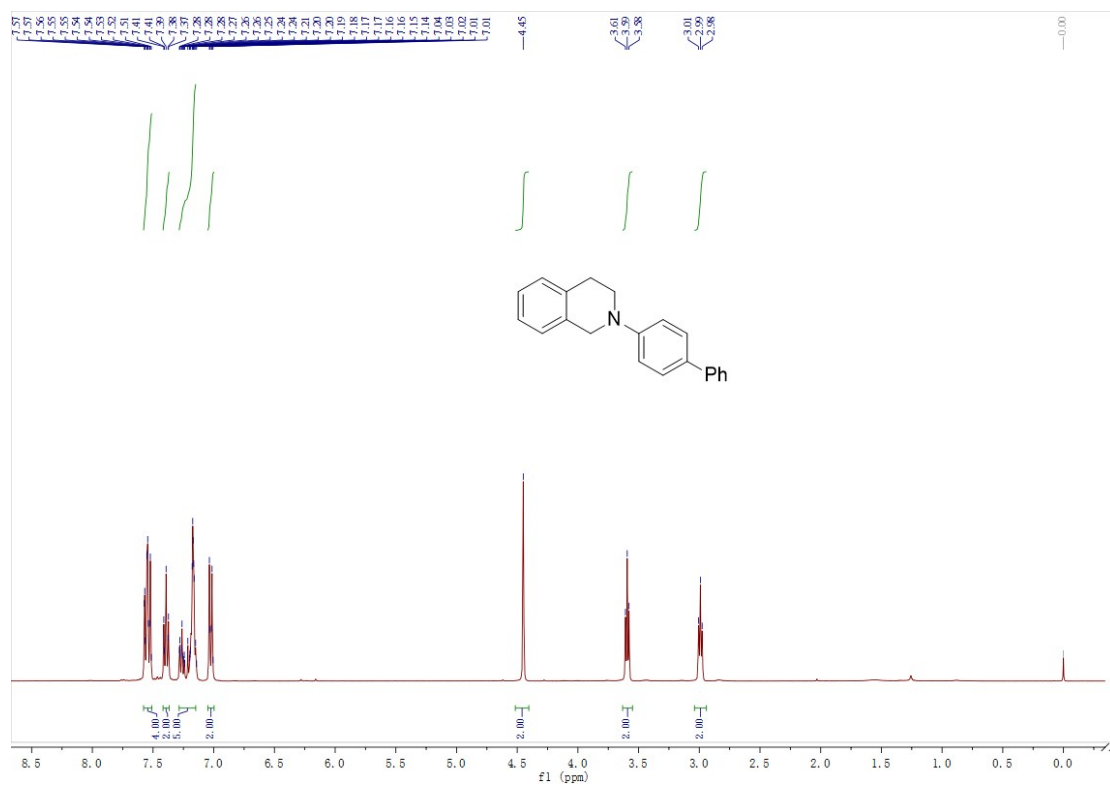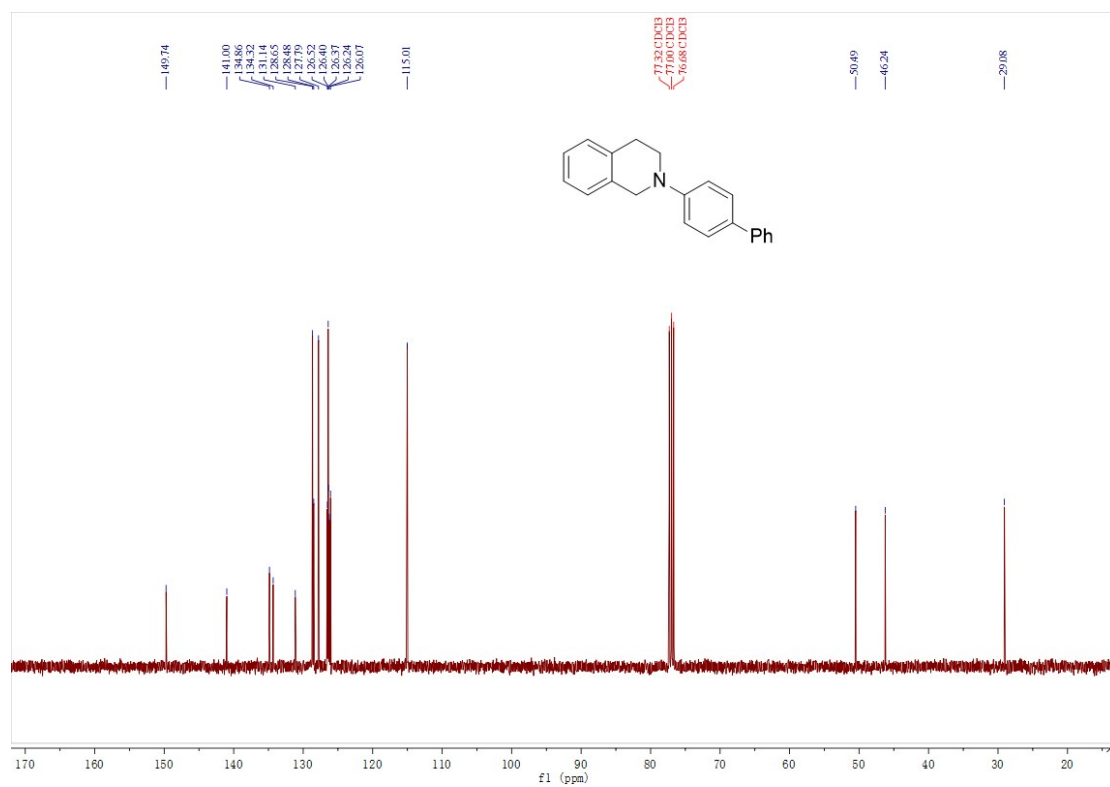

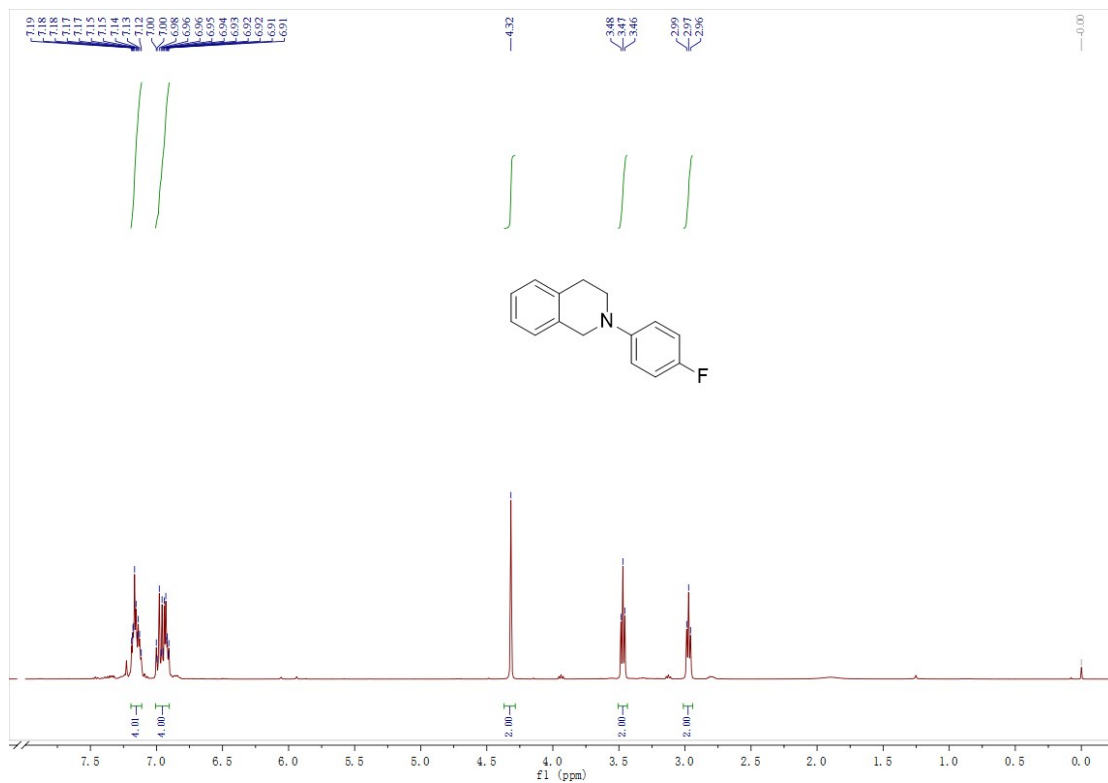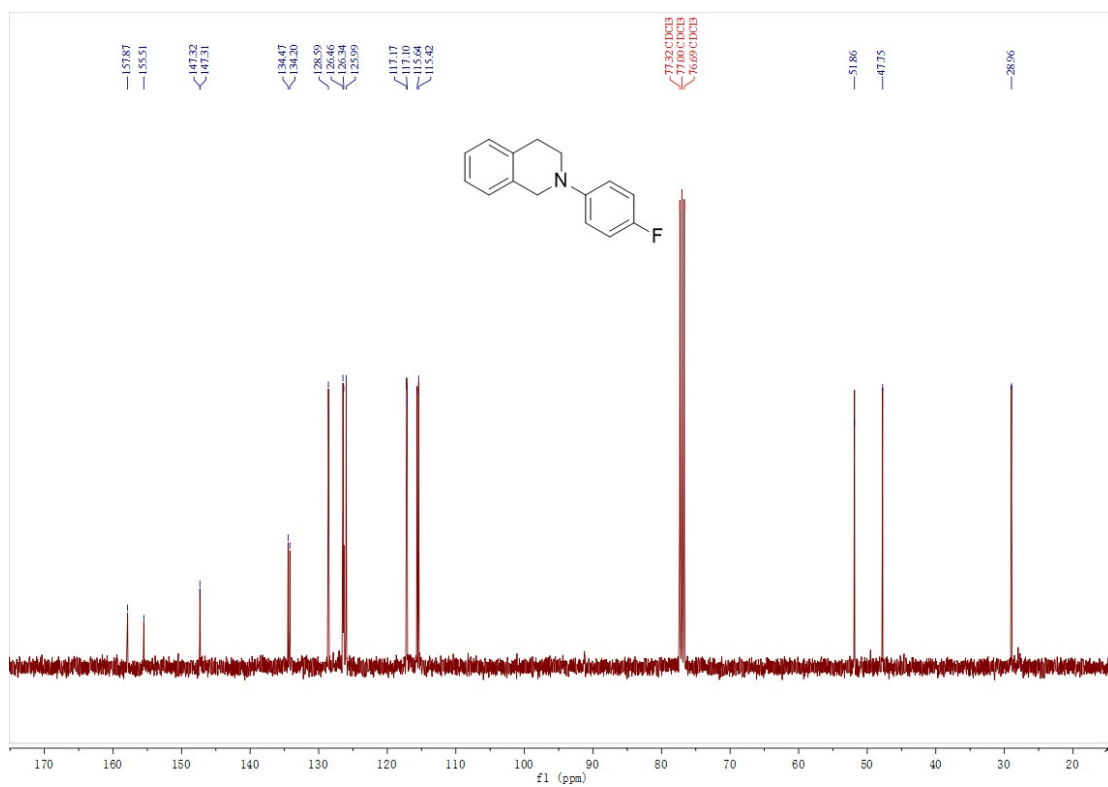

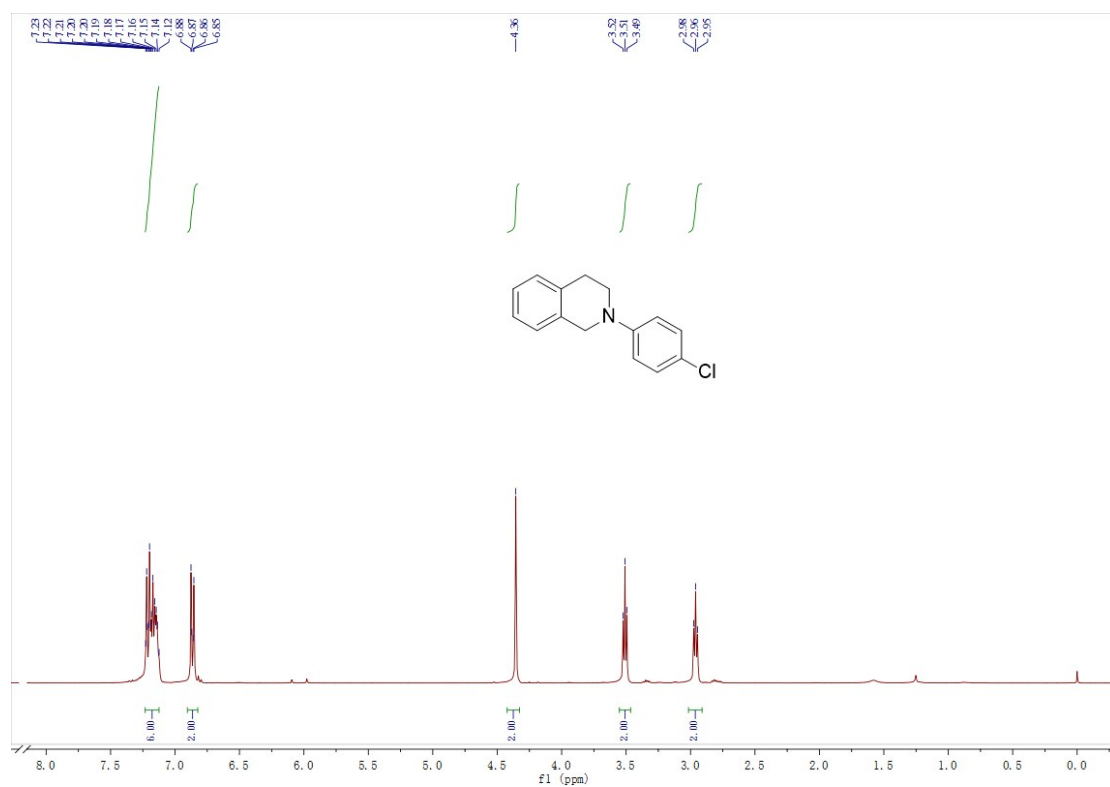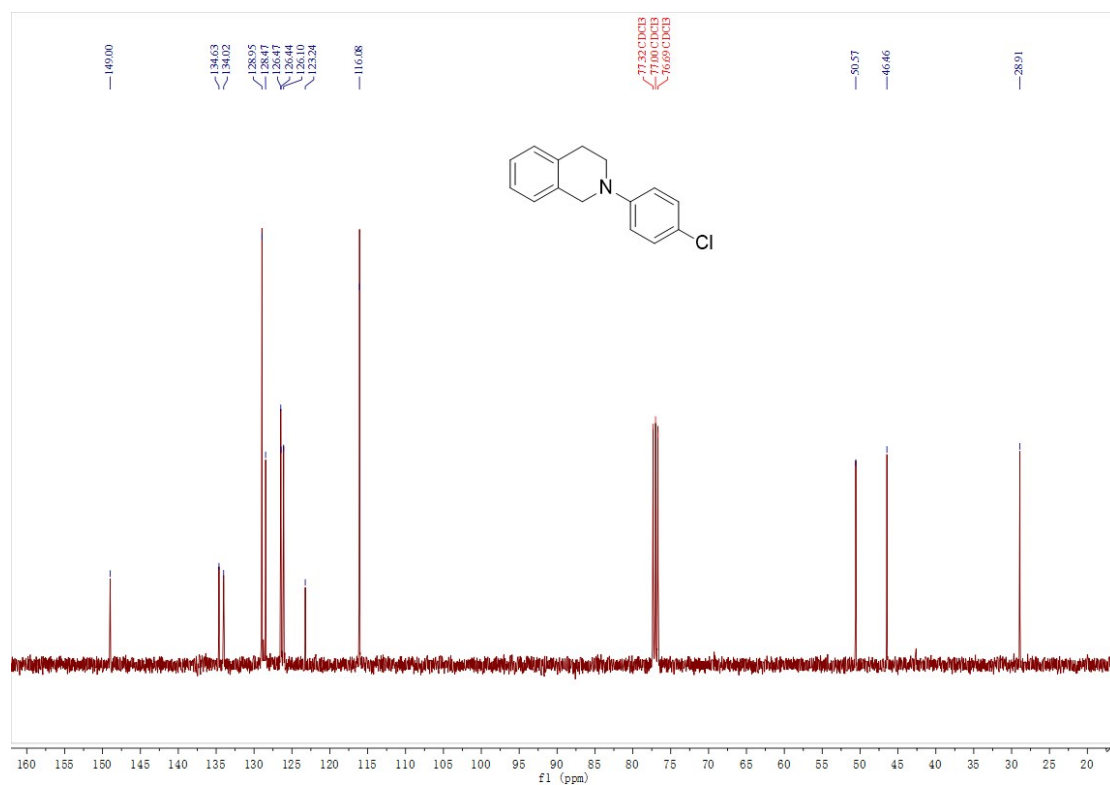

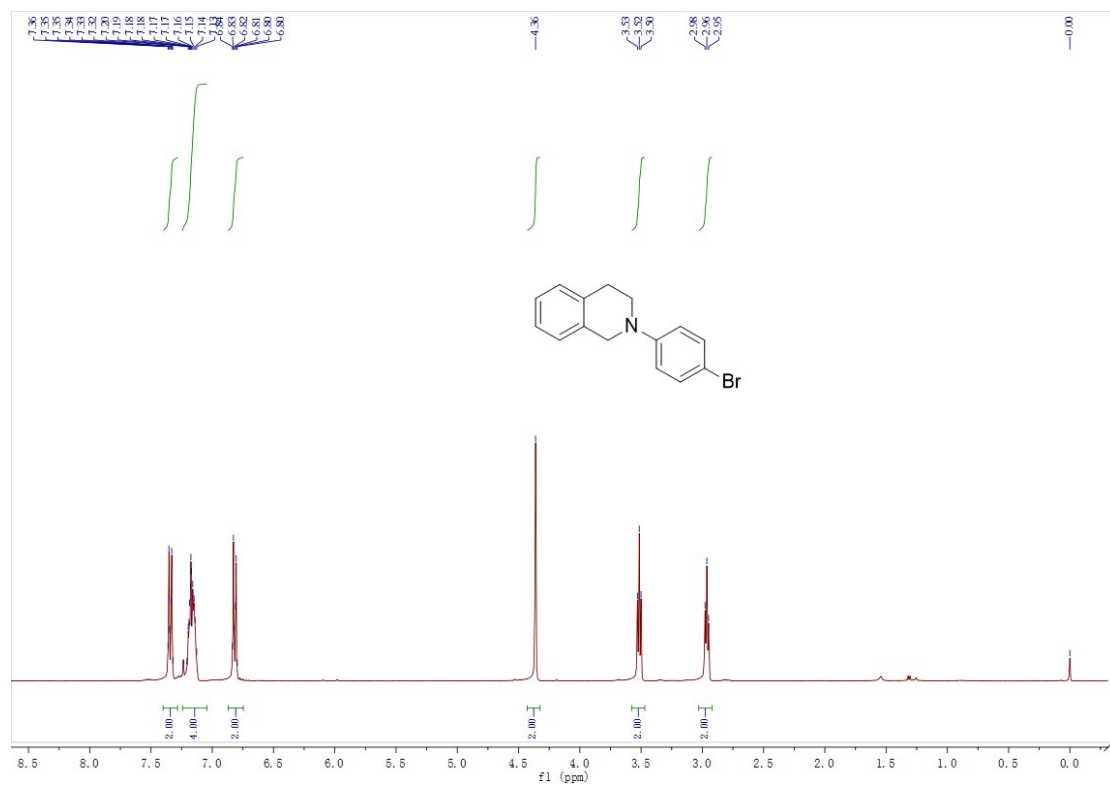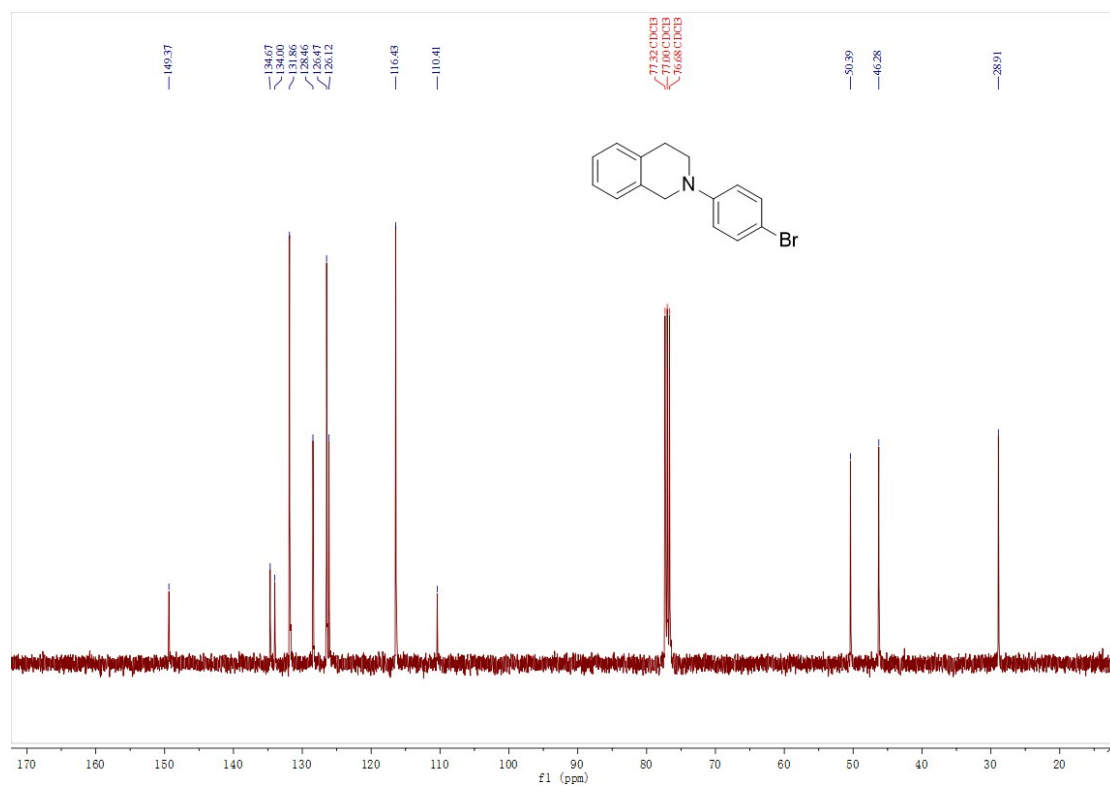

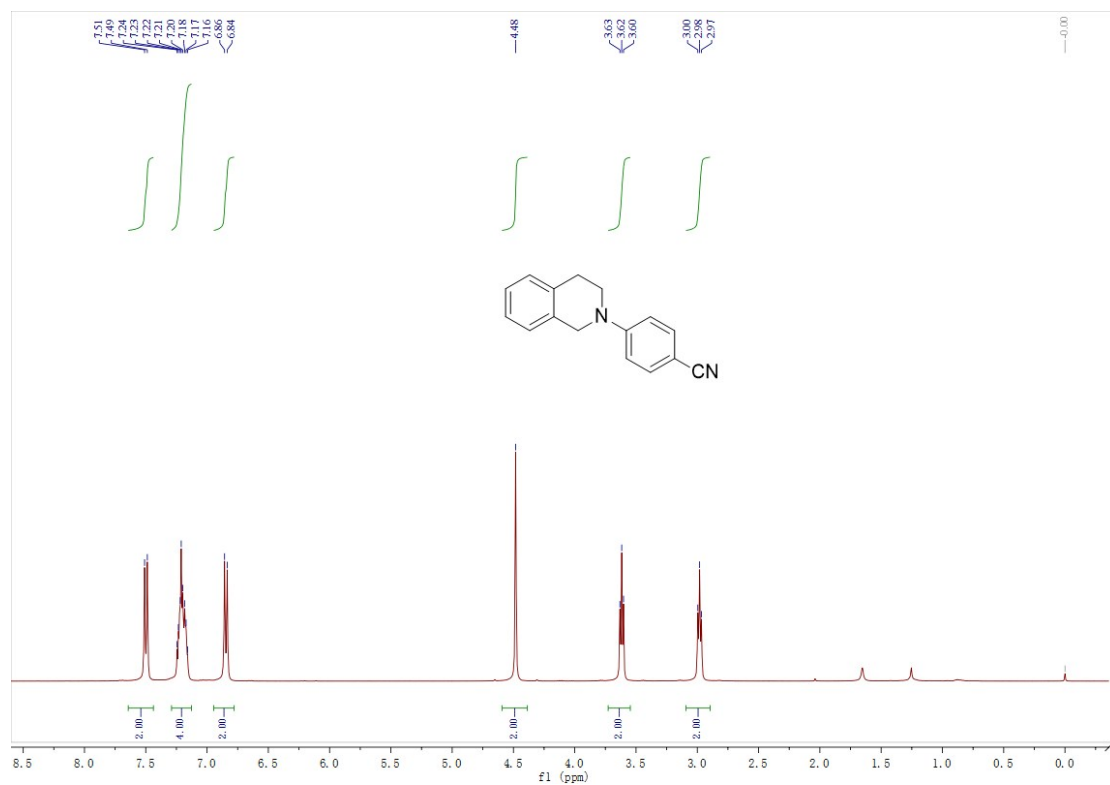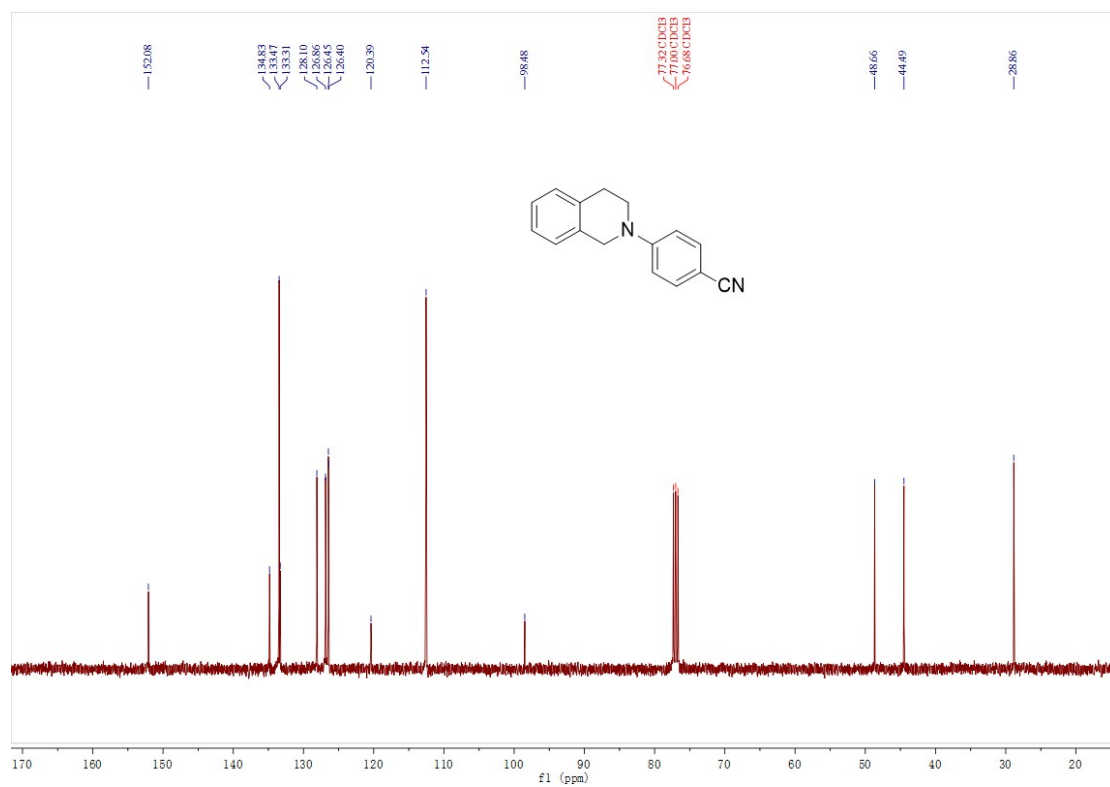

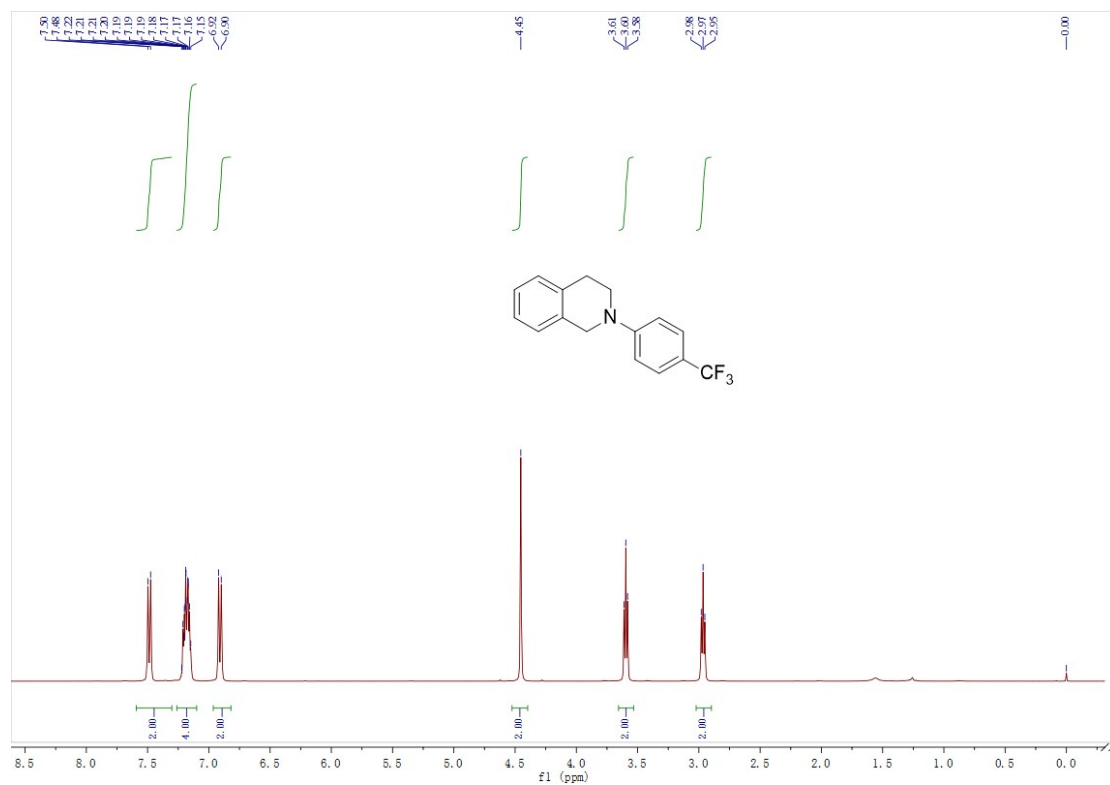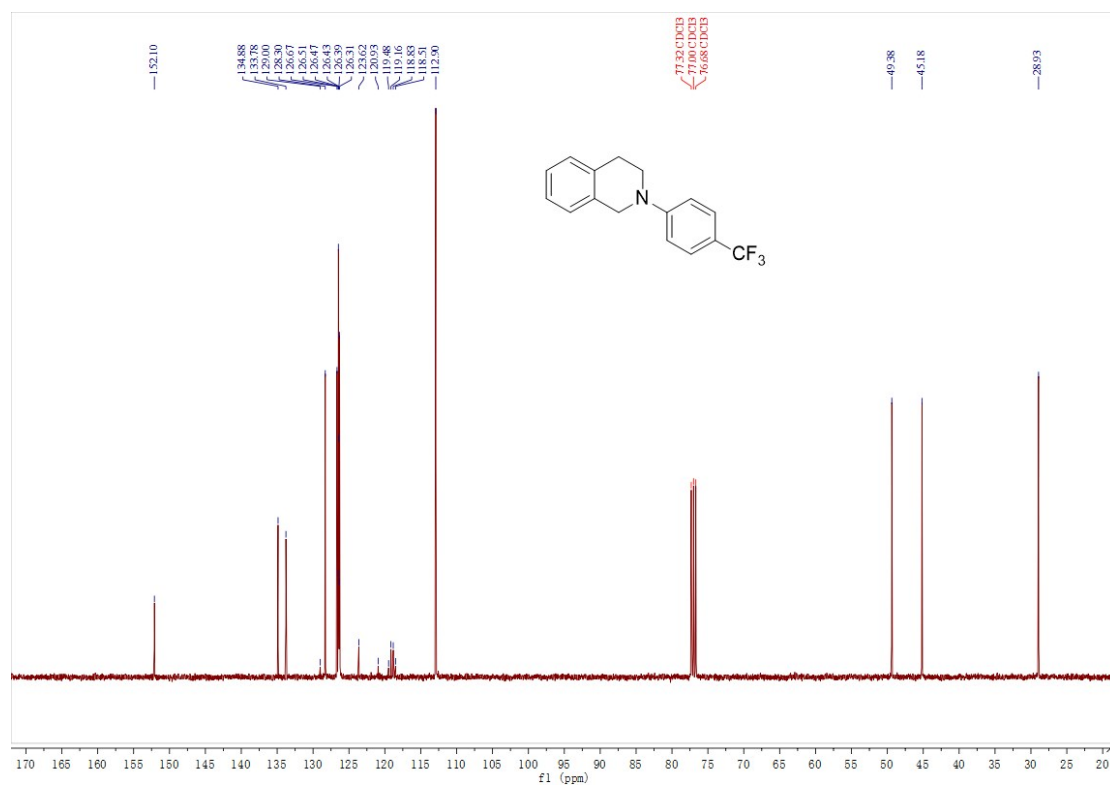

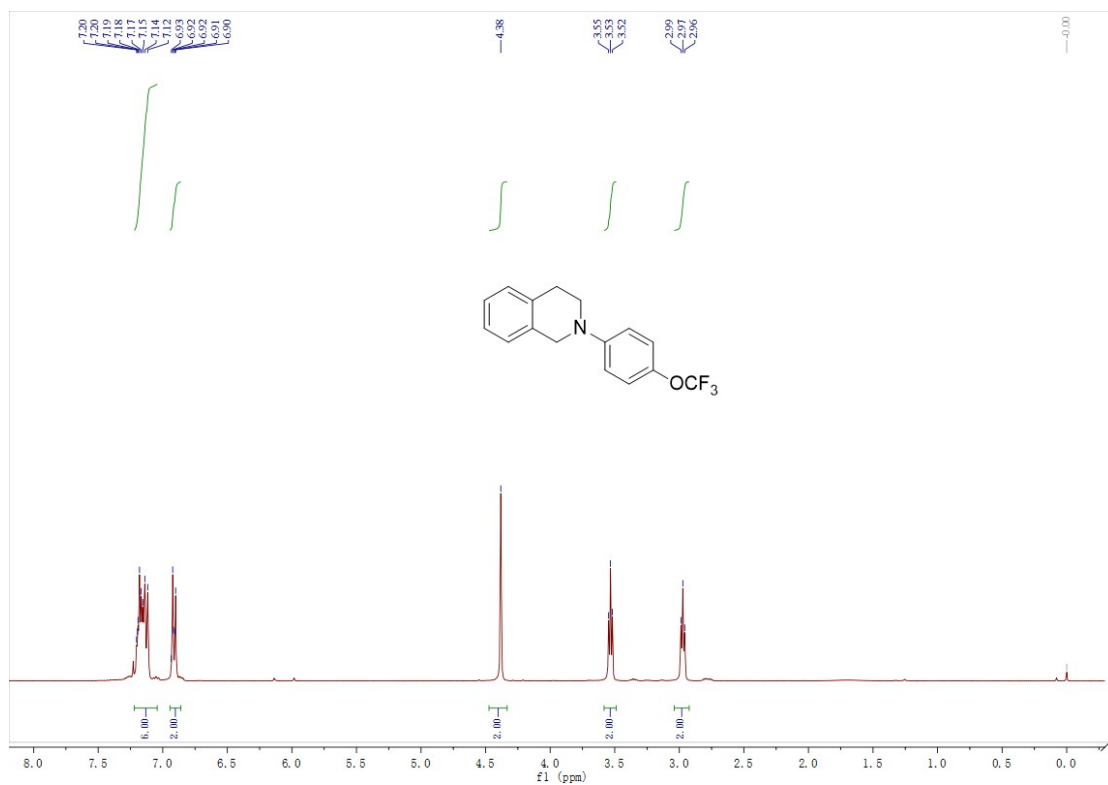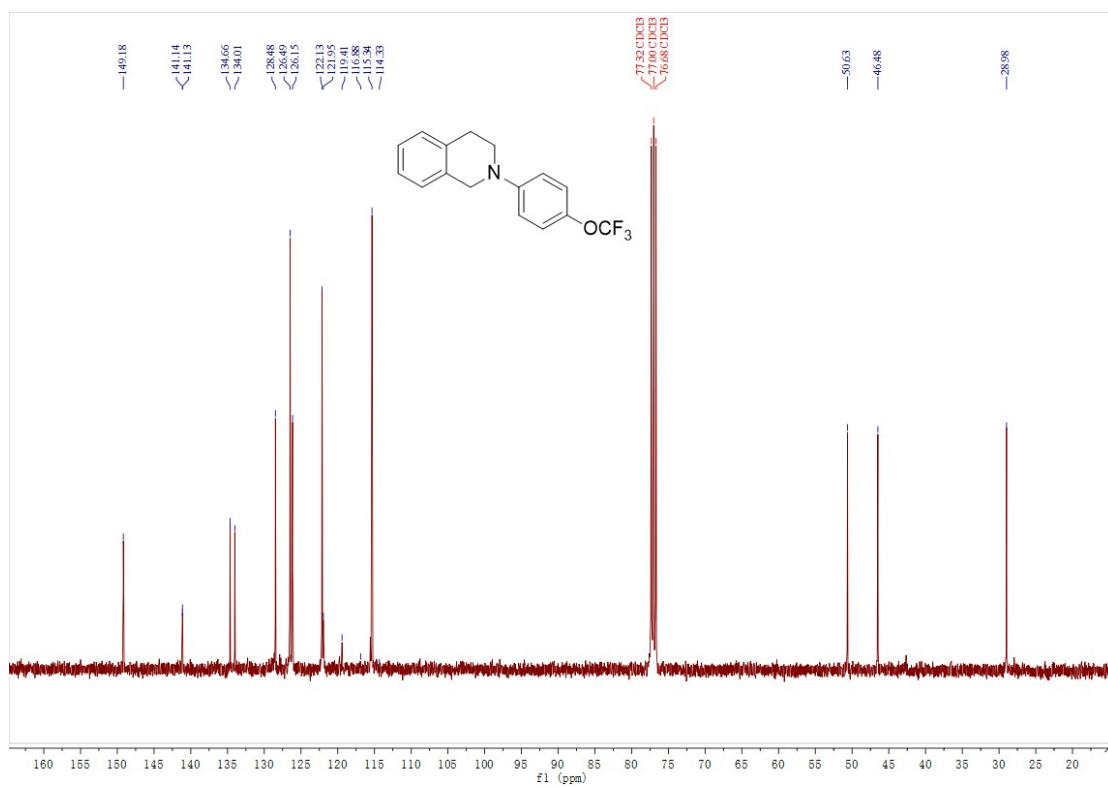



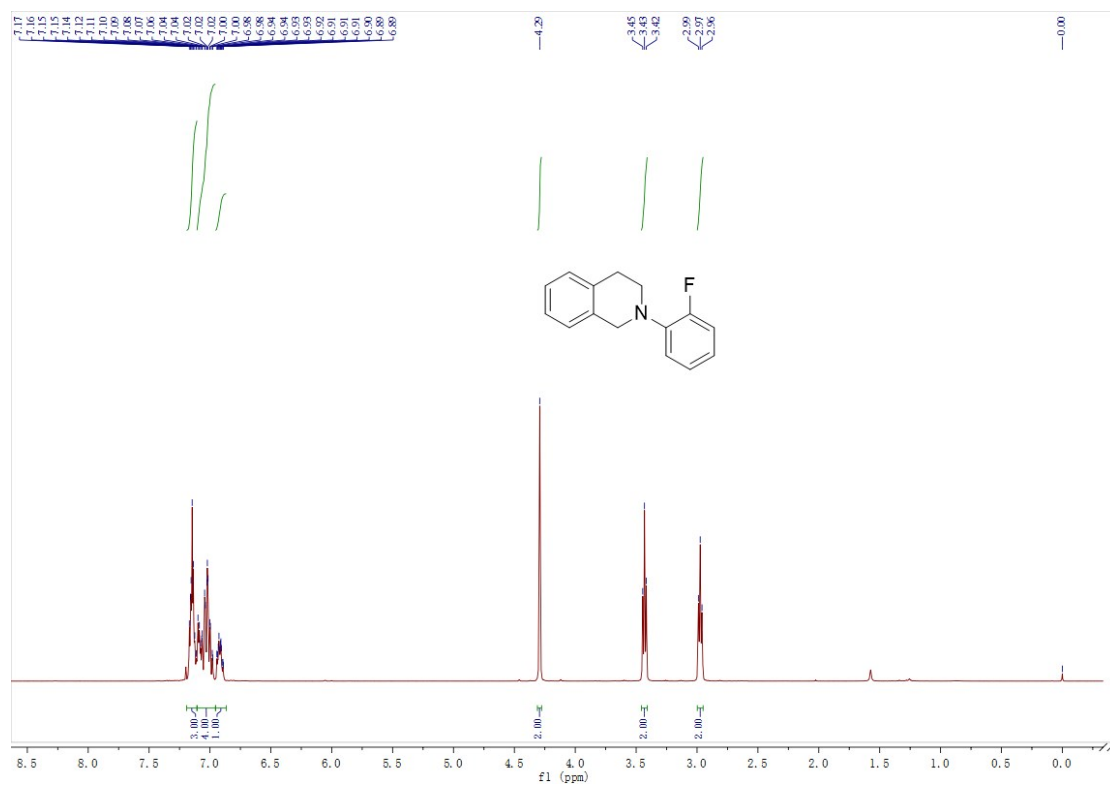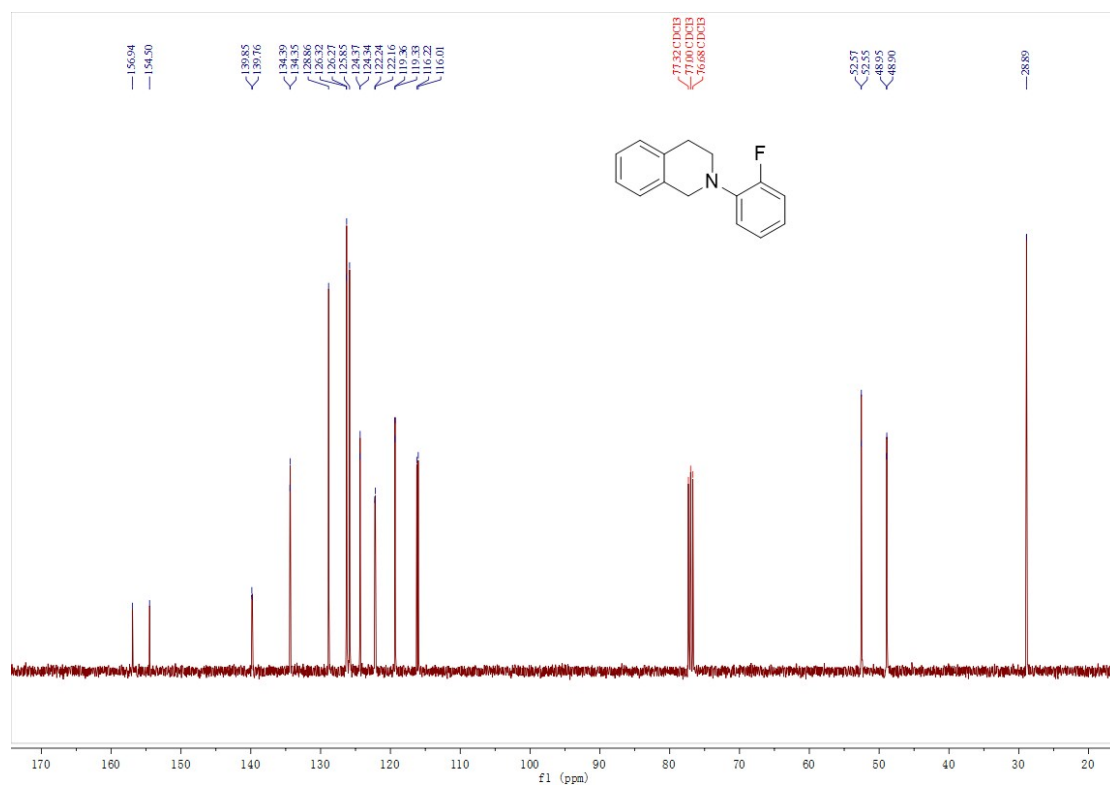

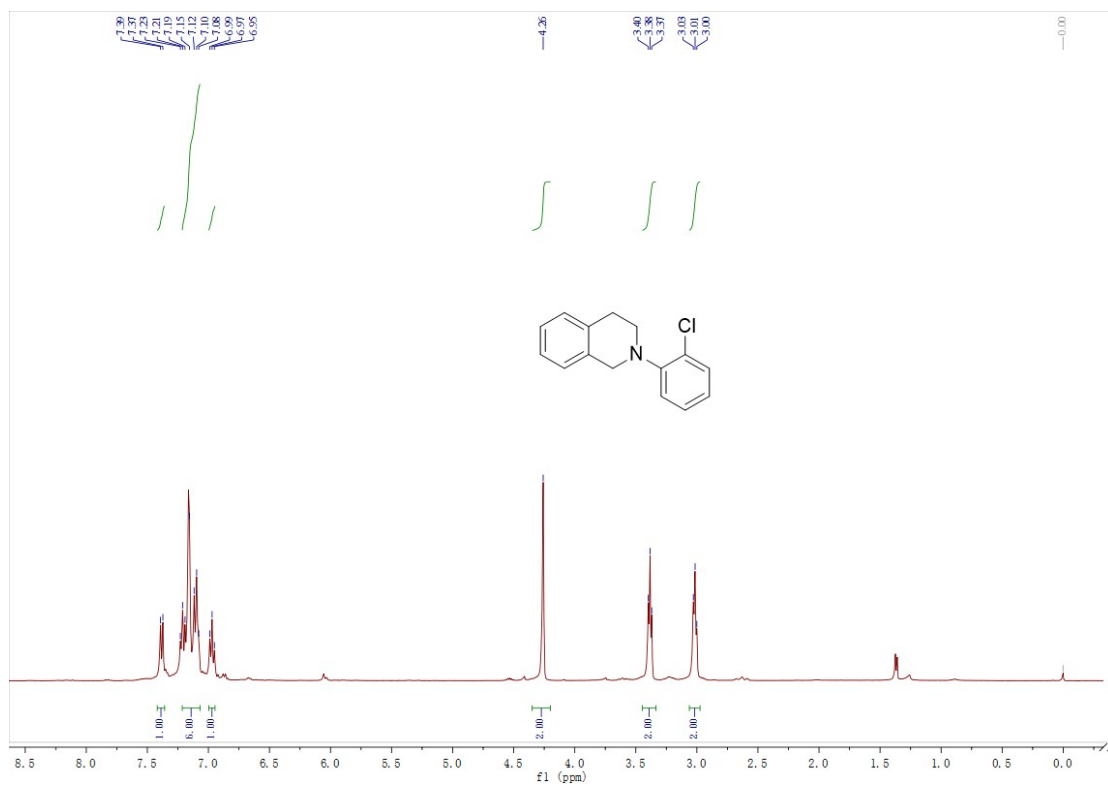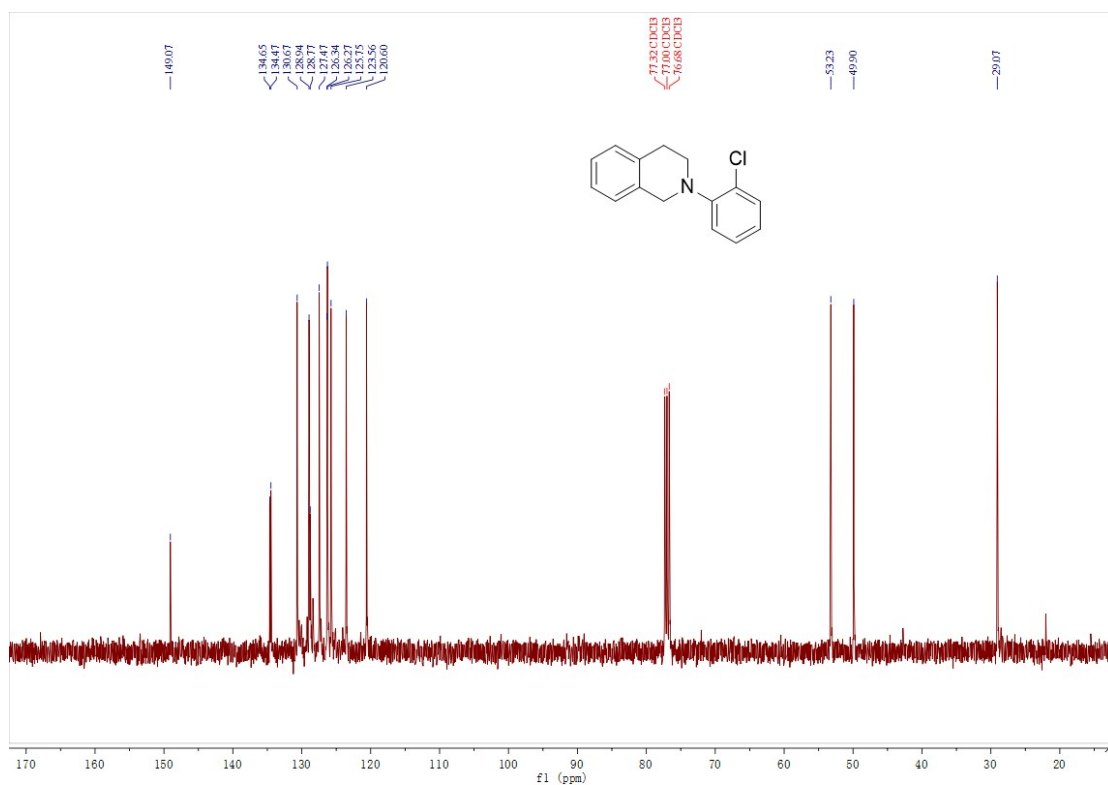

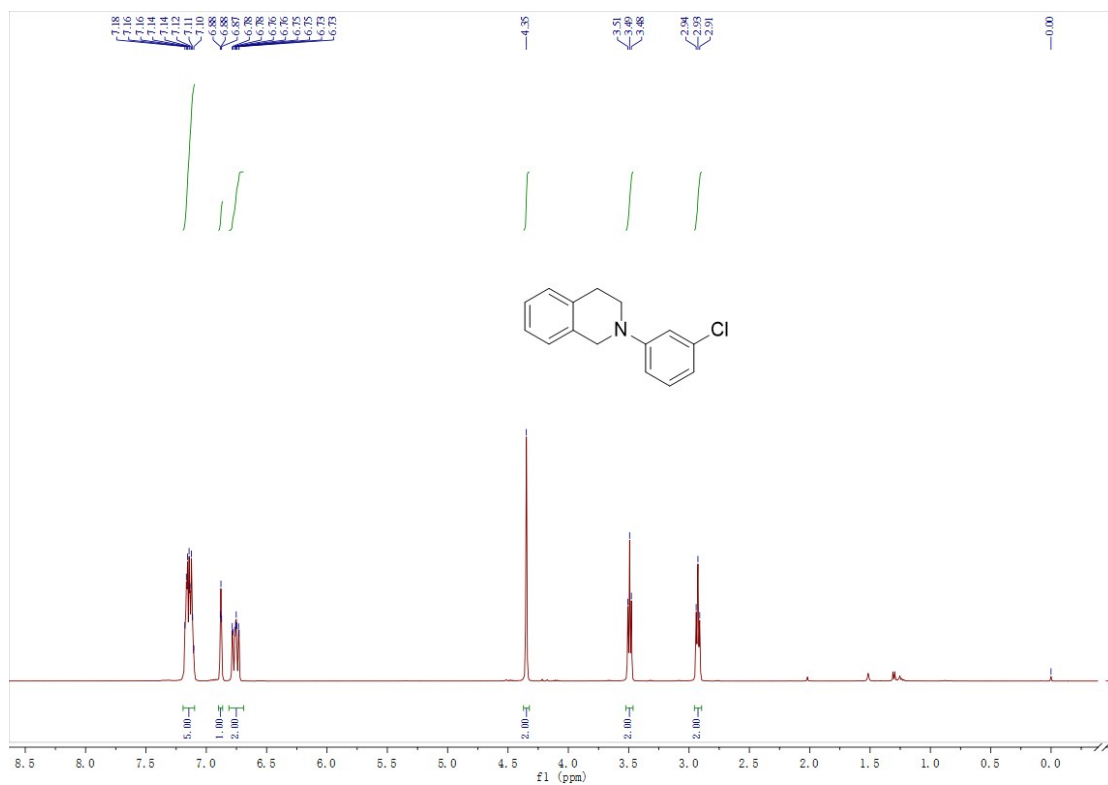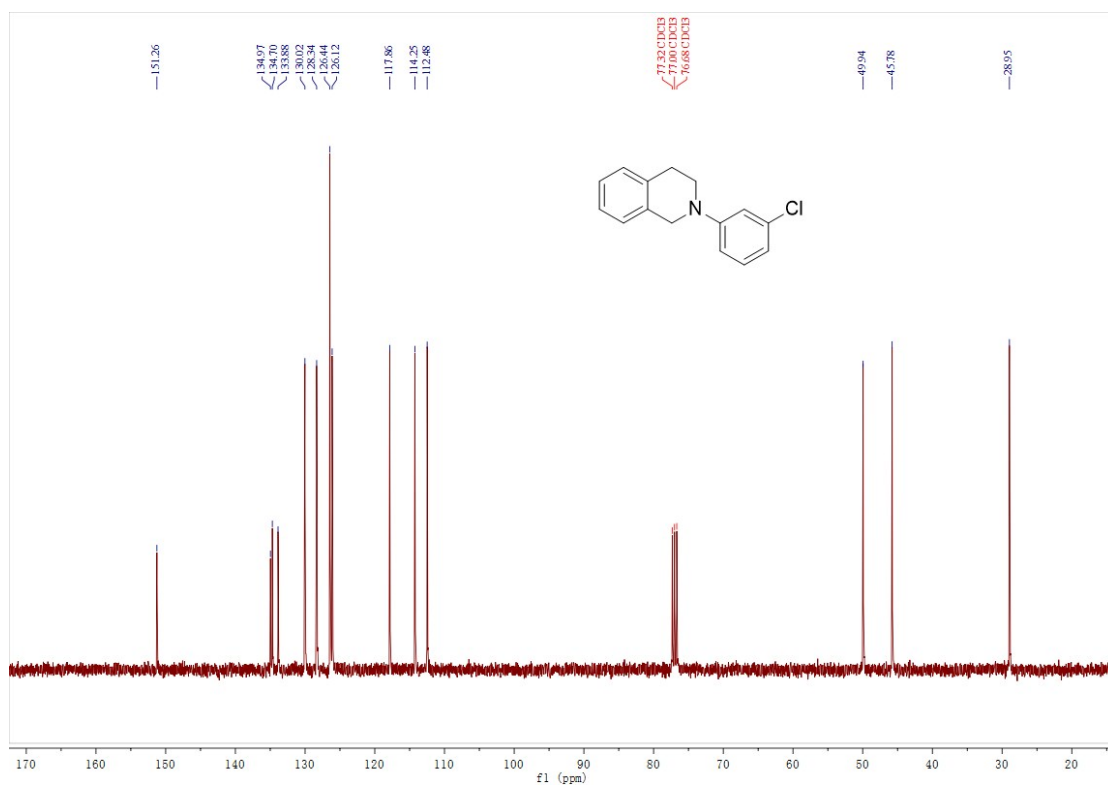

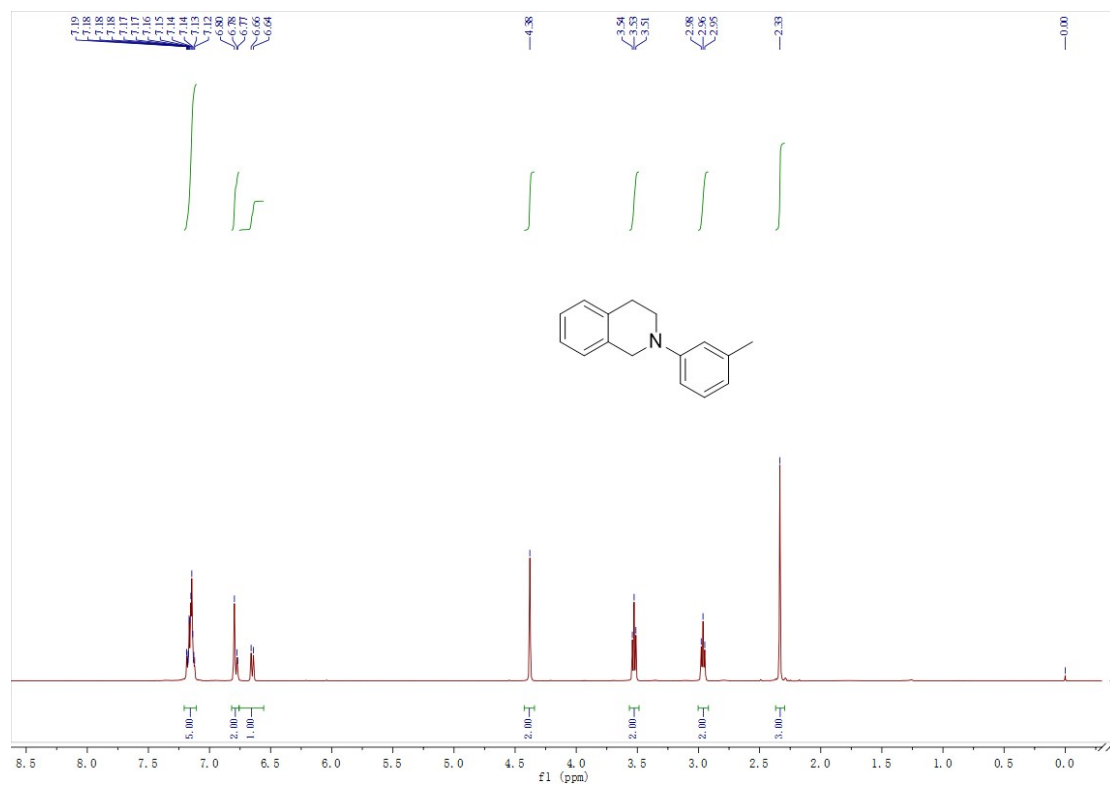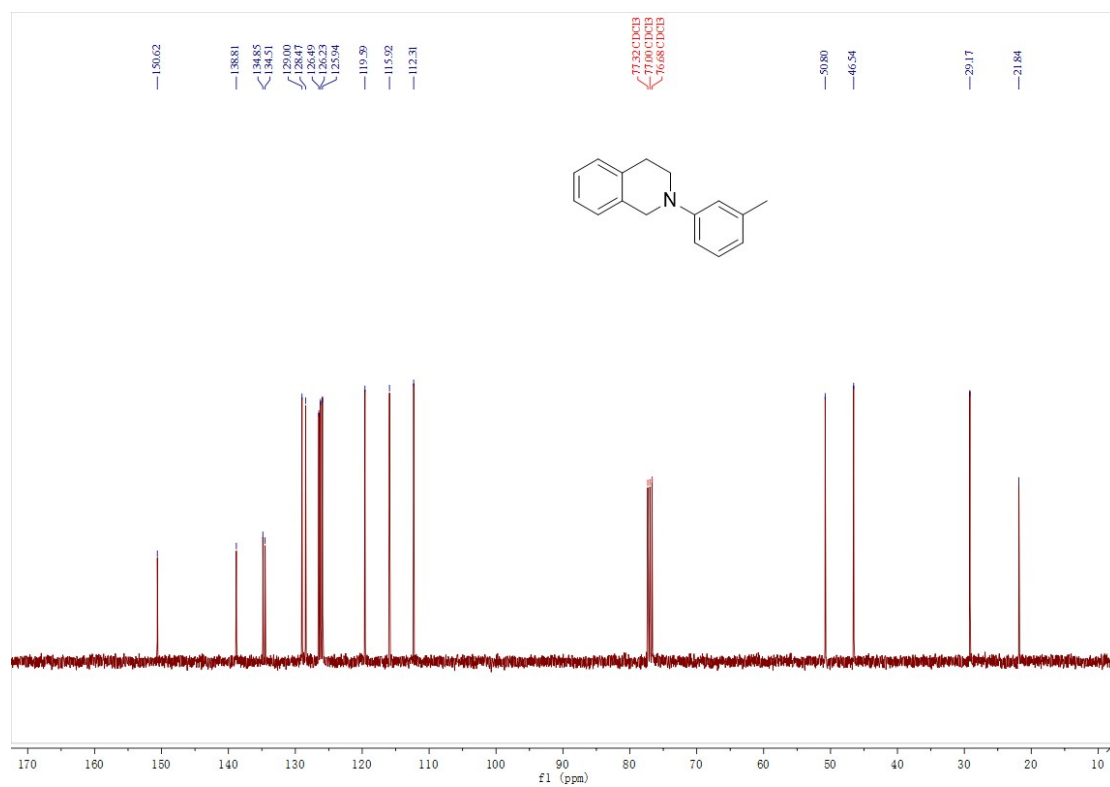

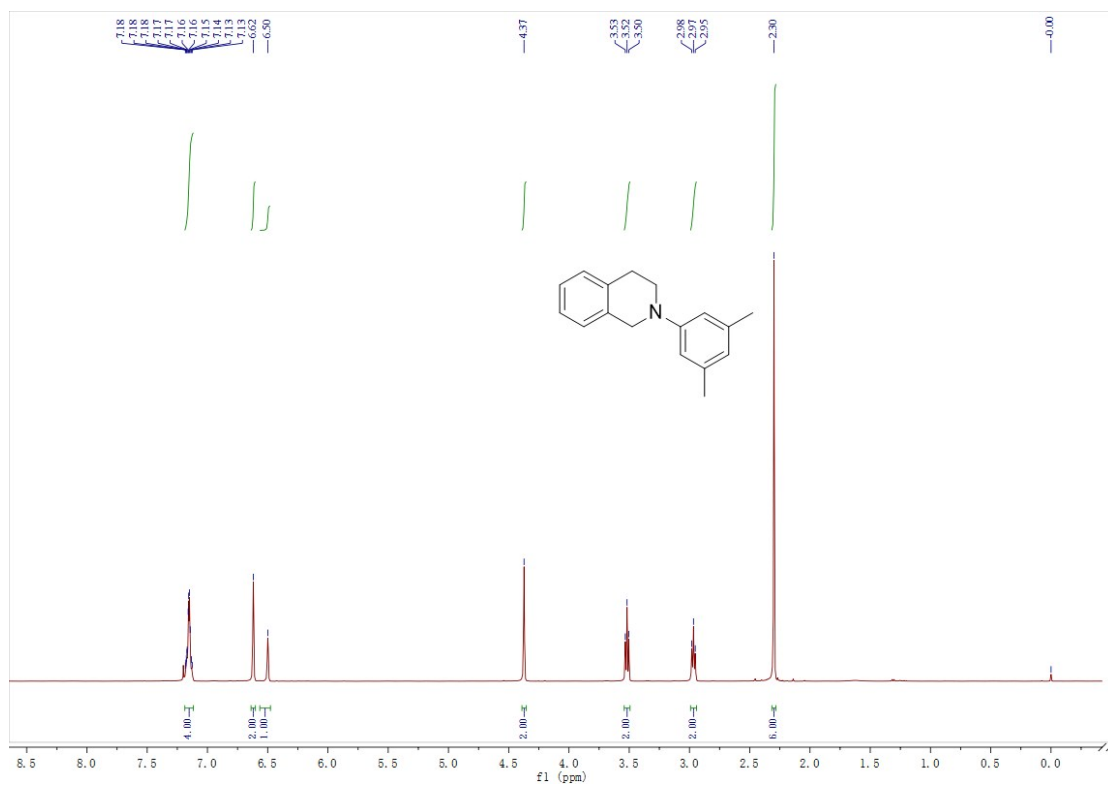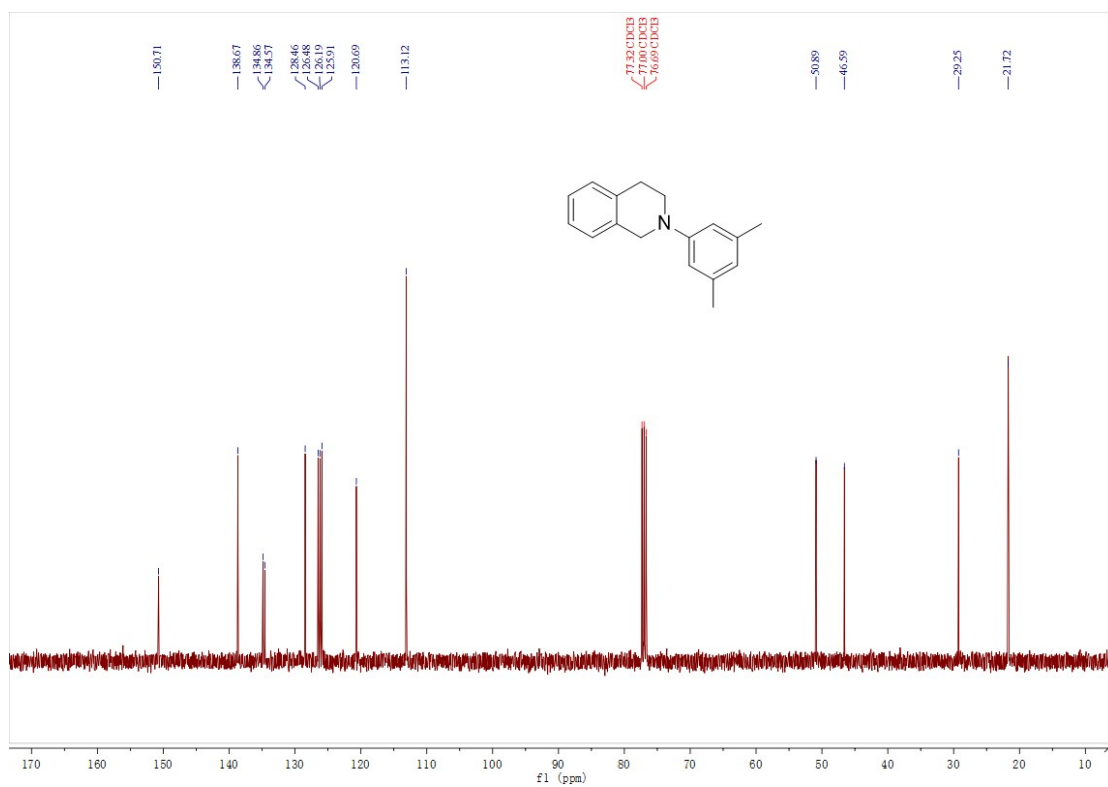

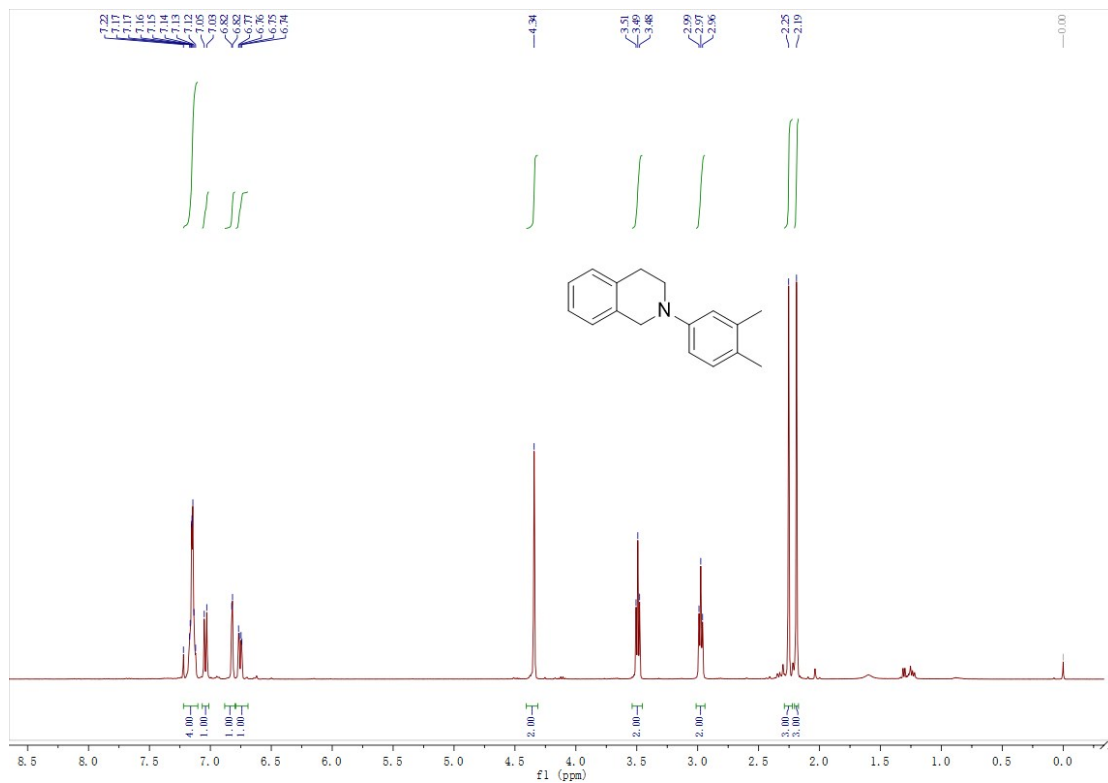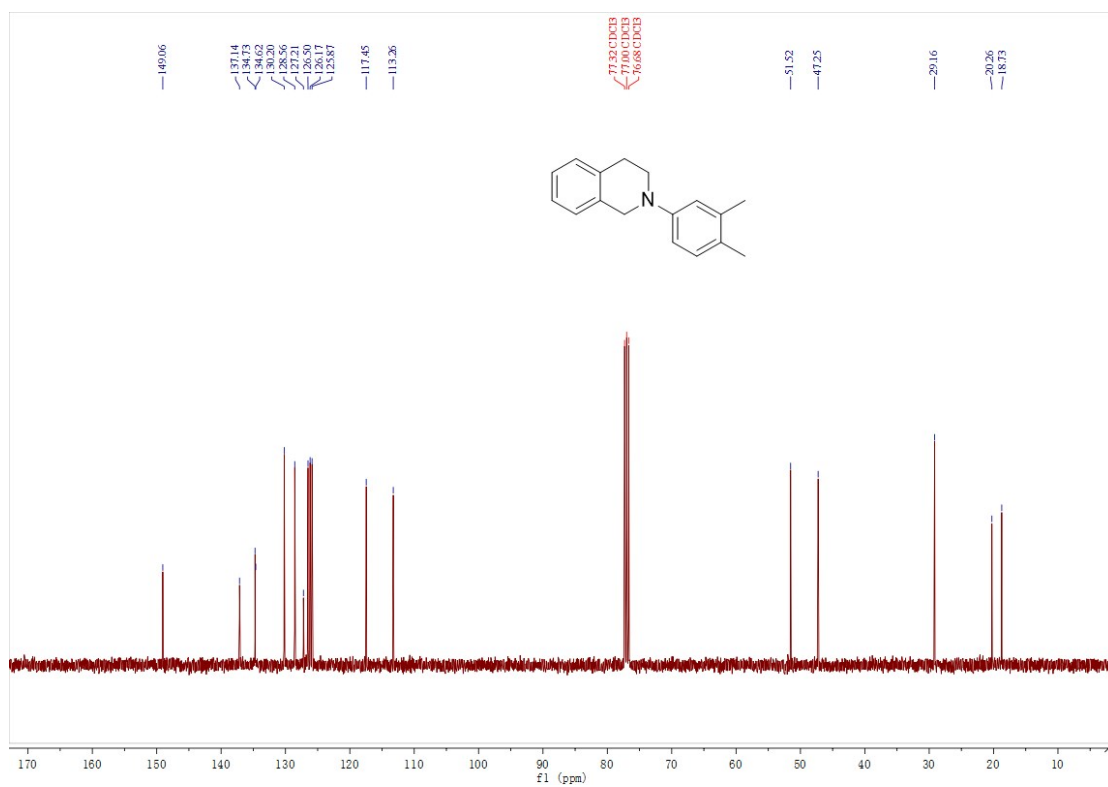

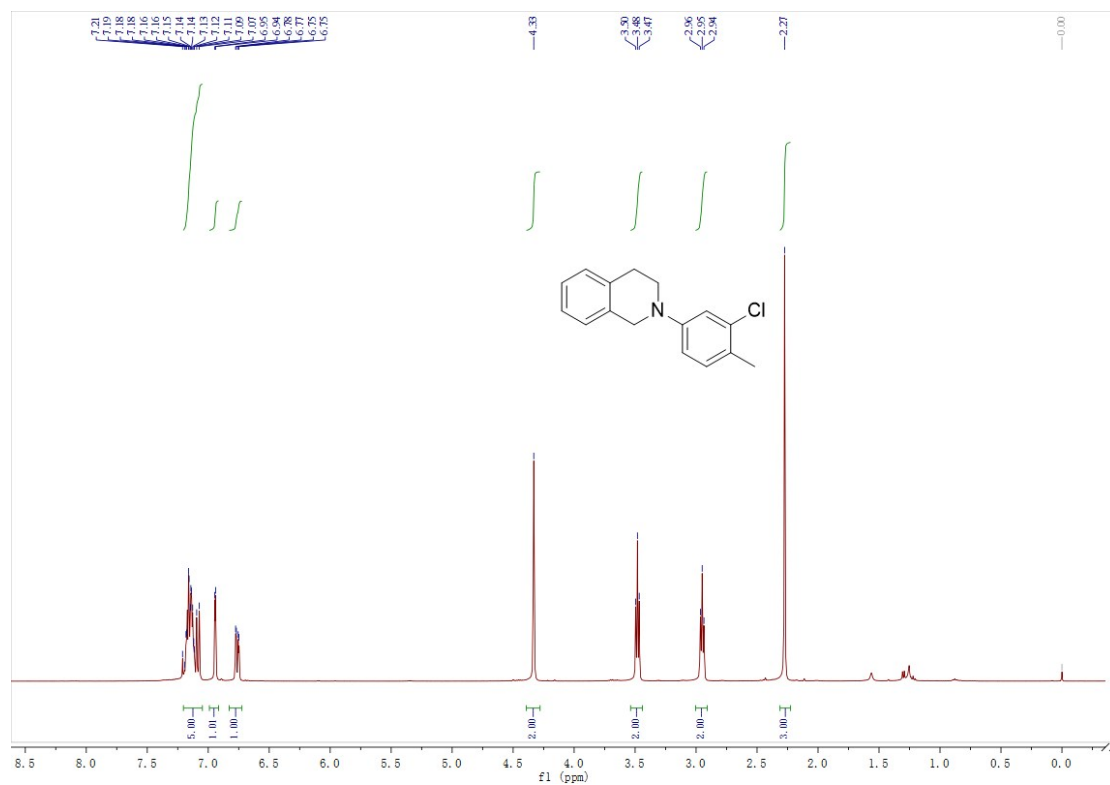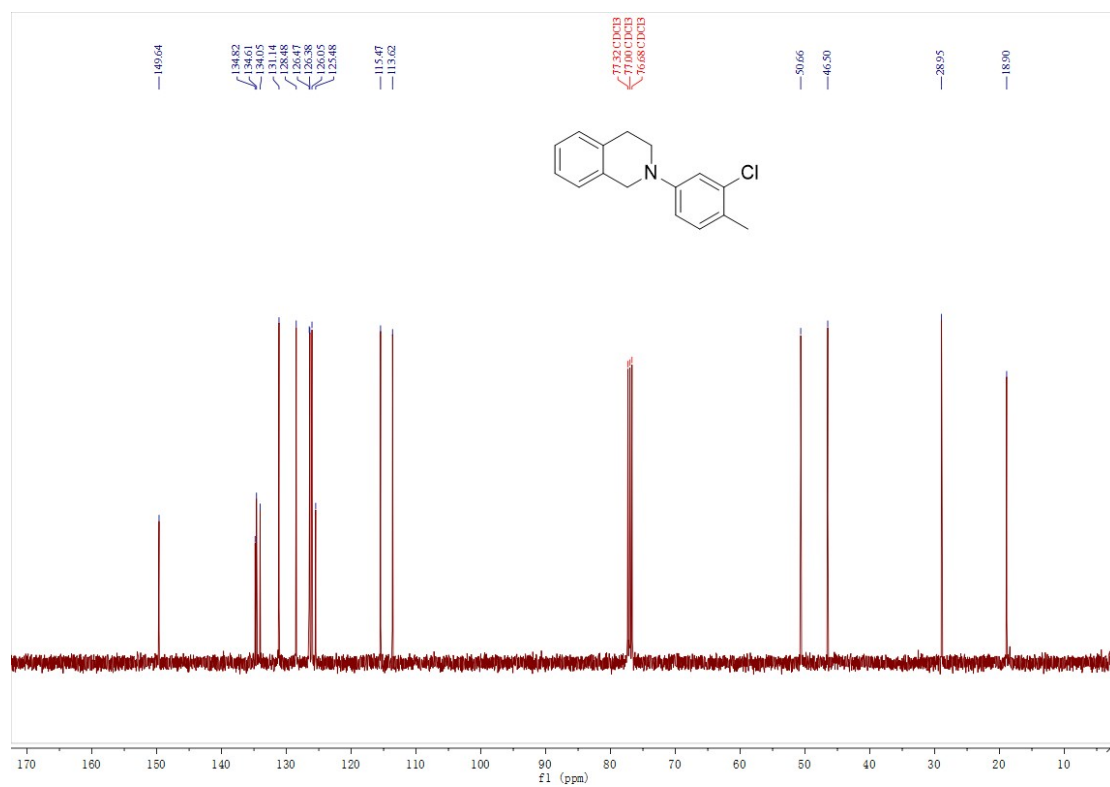

# Copies of $^1\text{H}$ and $^{13}\text{C}$ NMR spectra of all products

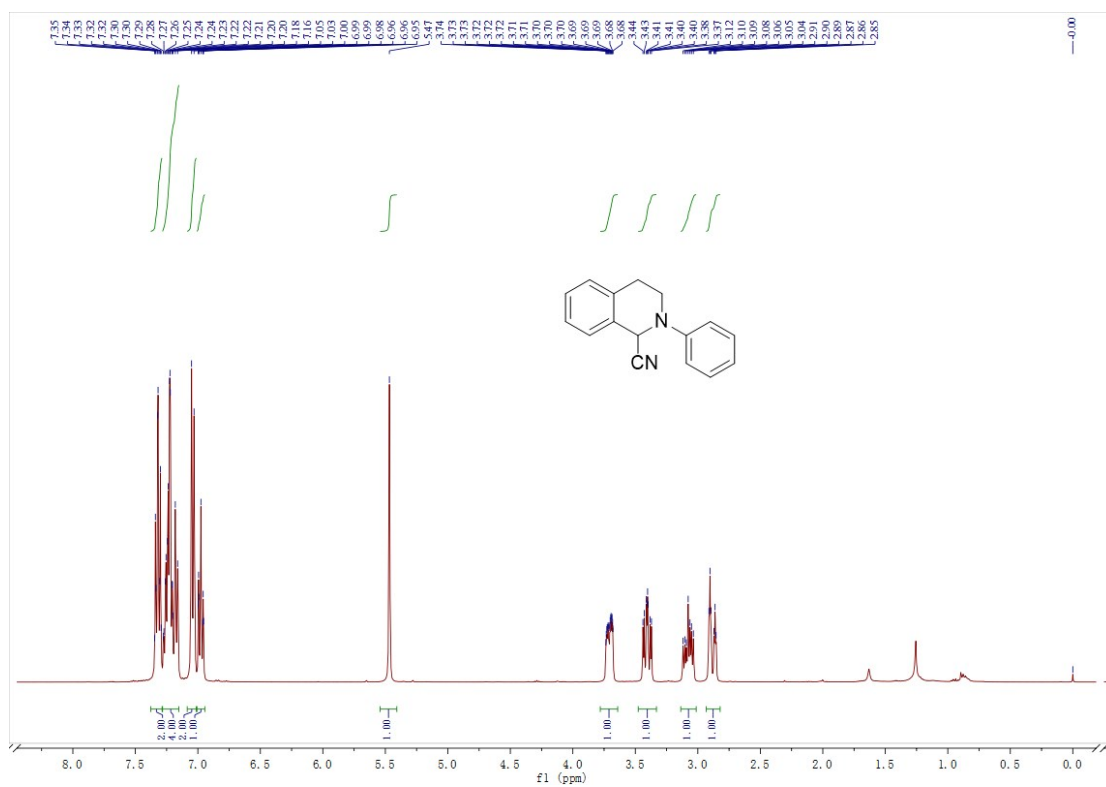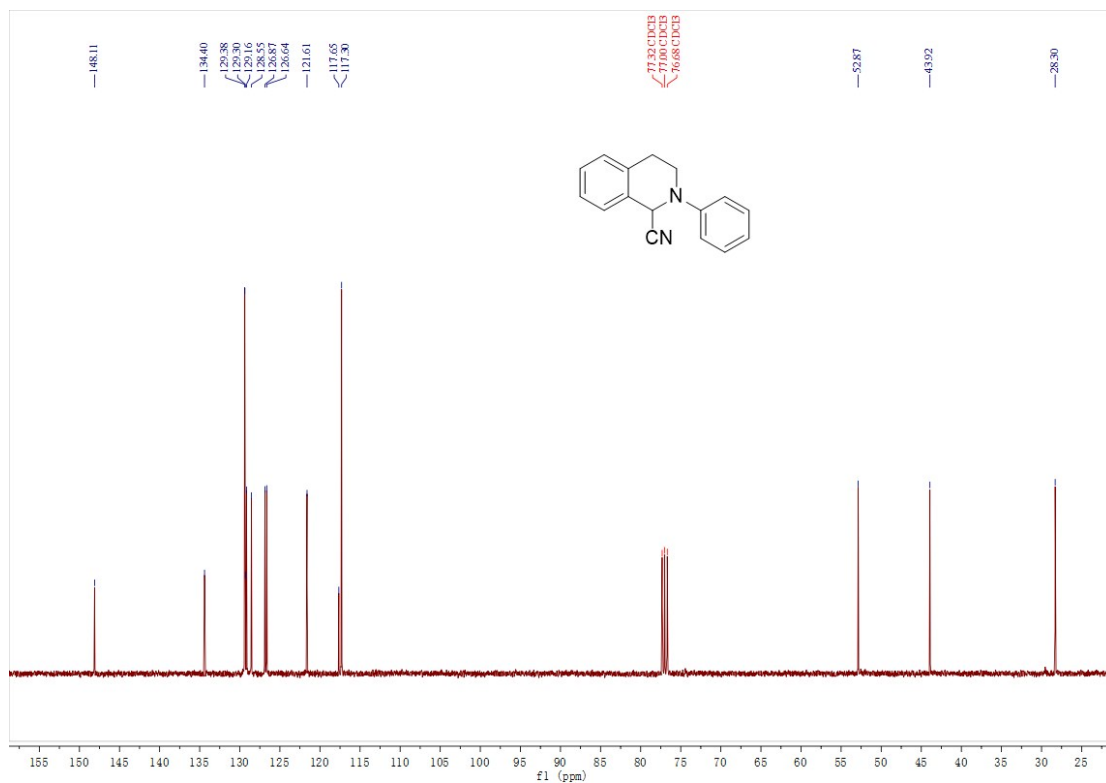



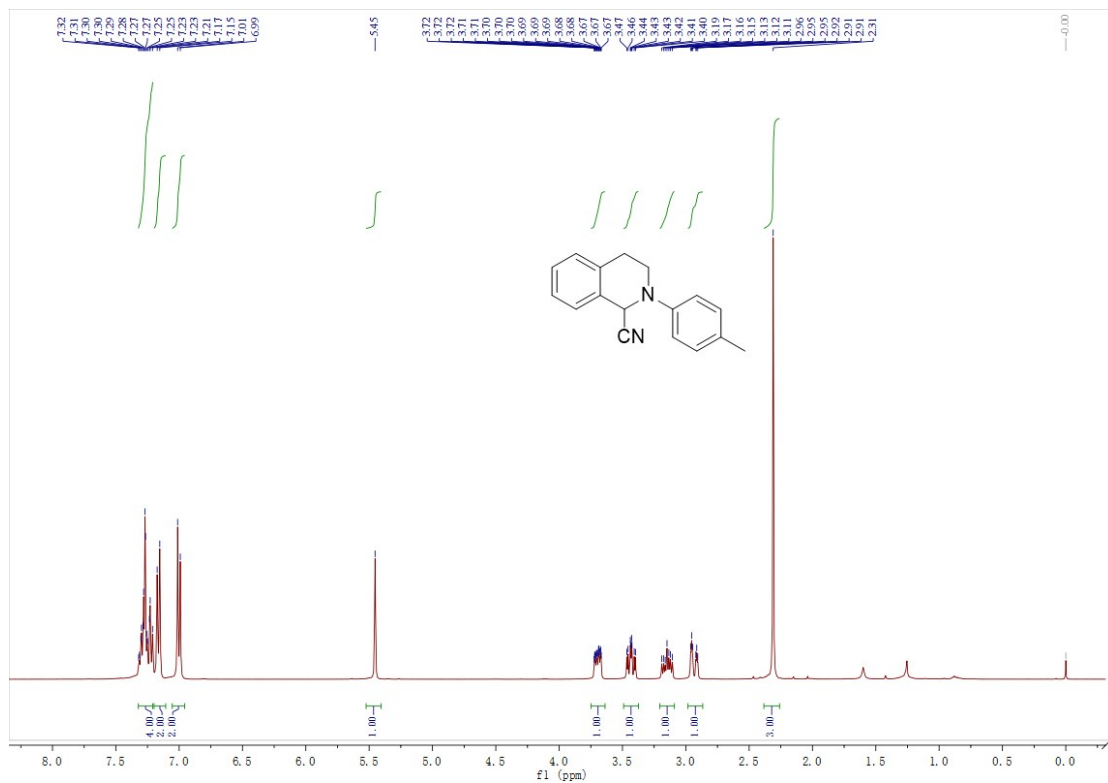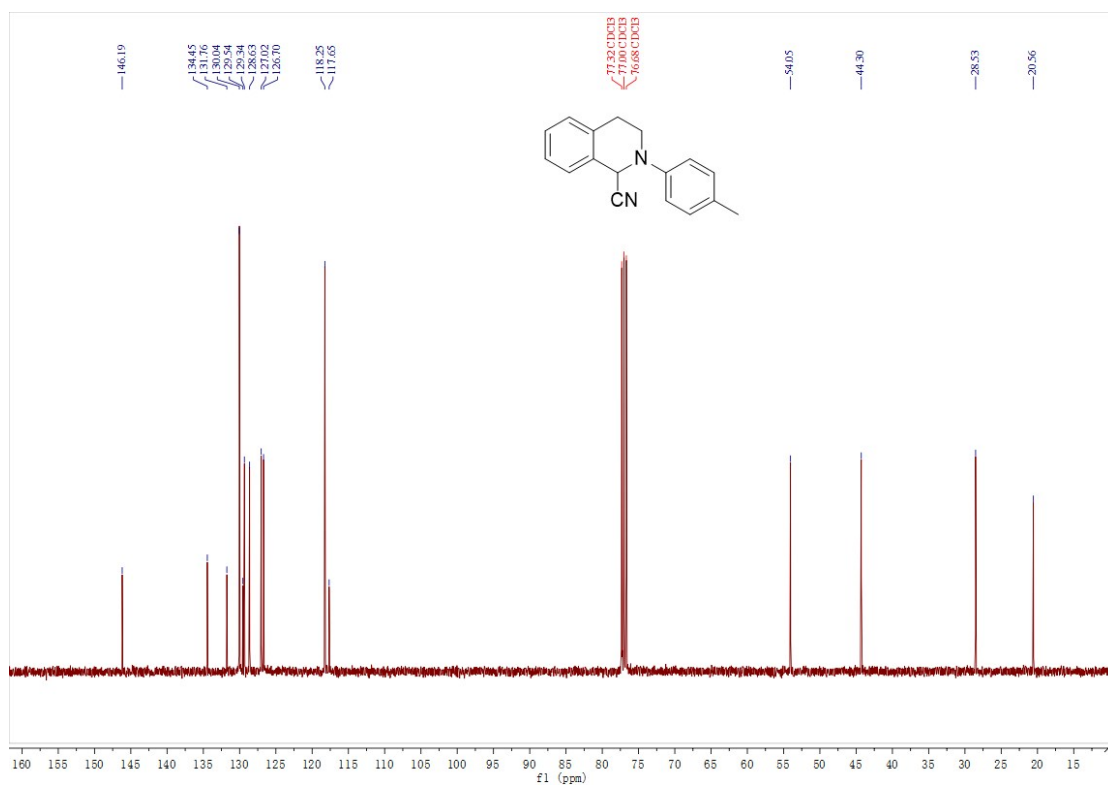

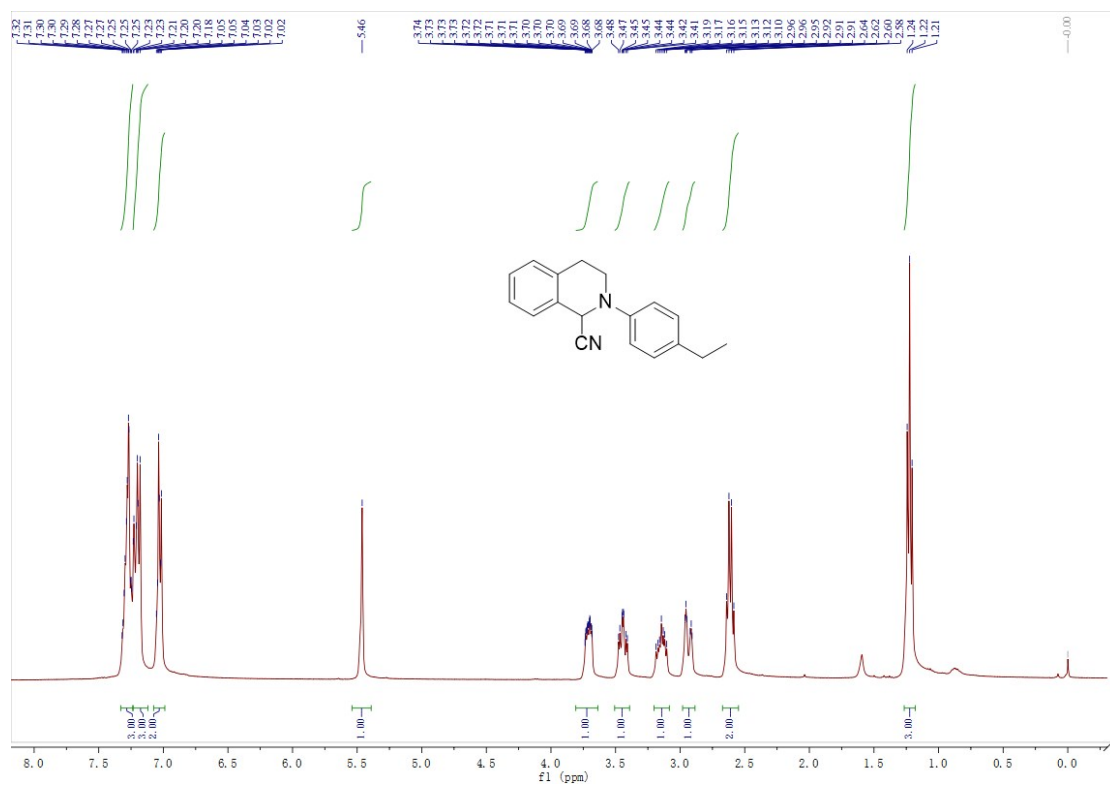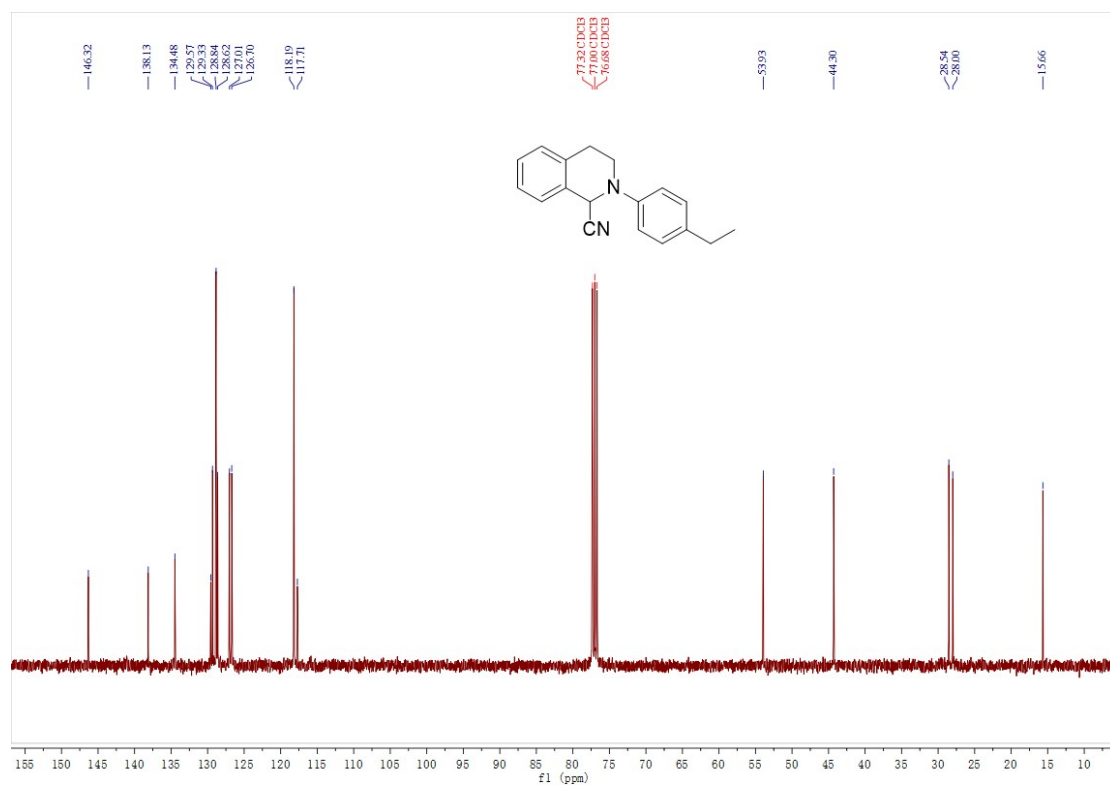

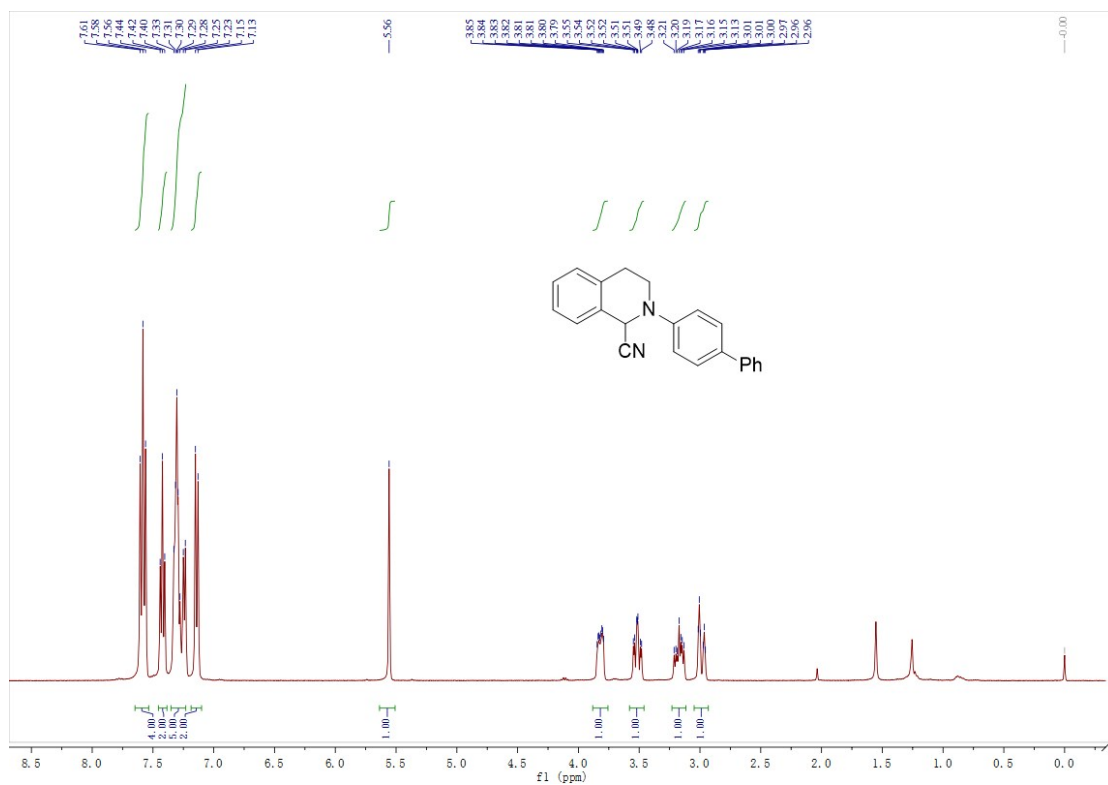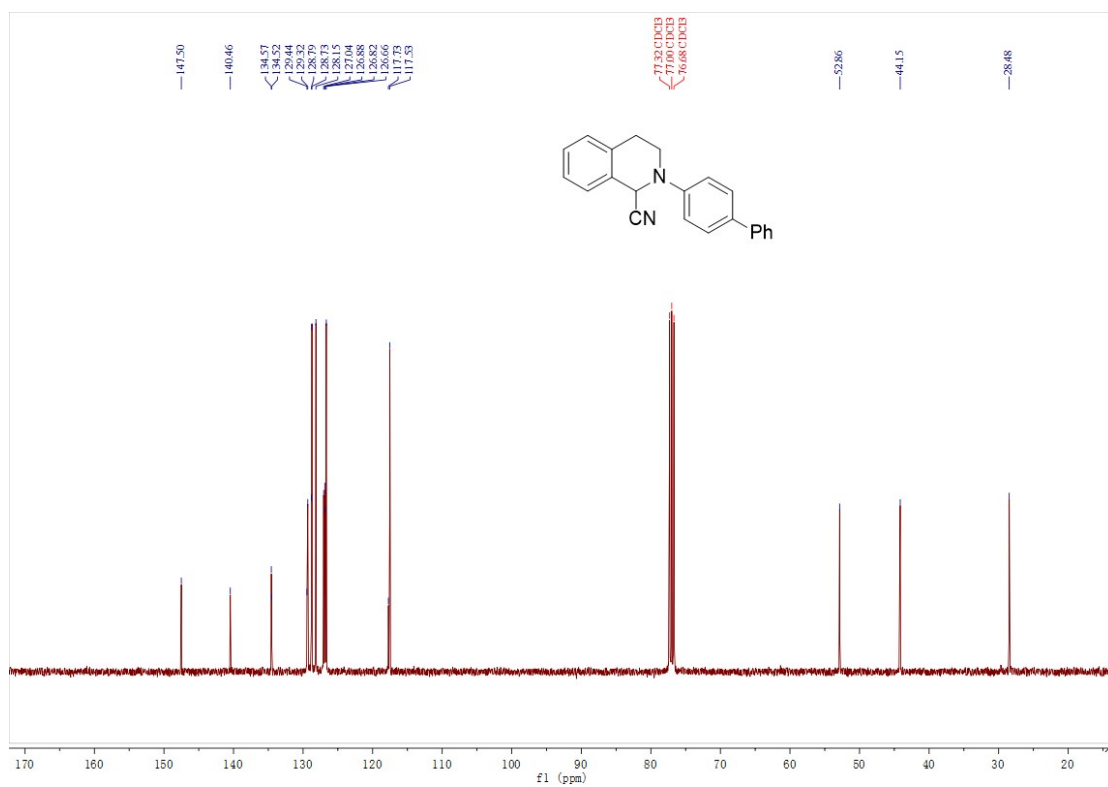

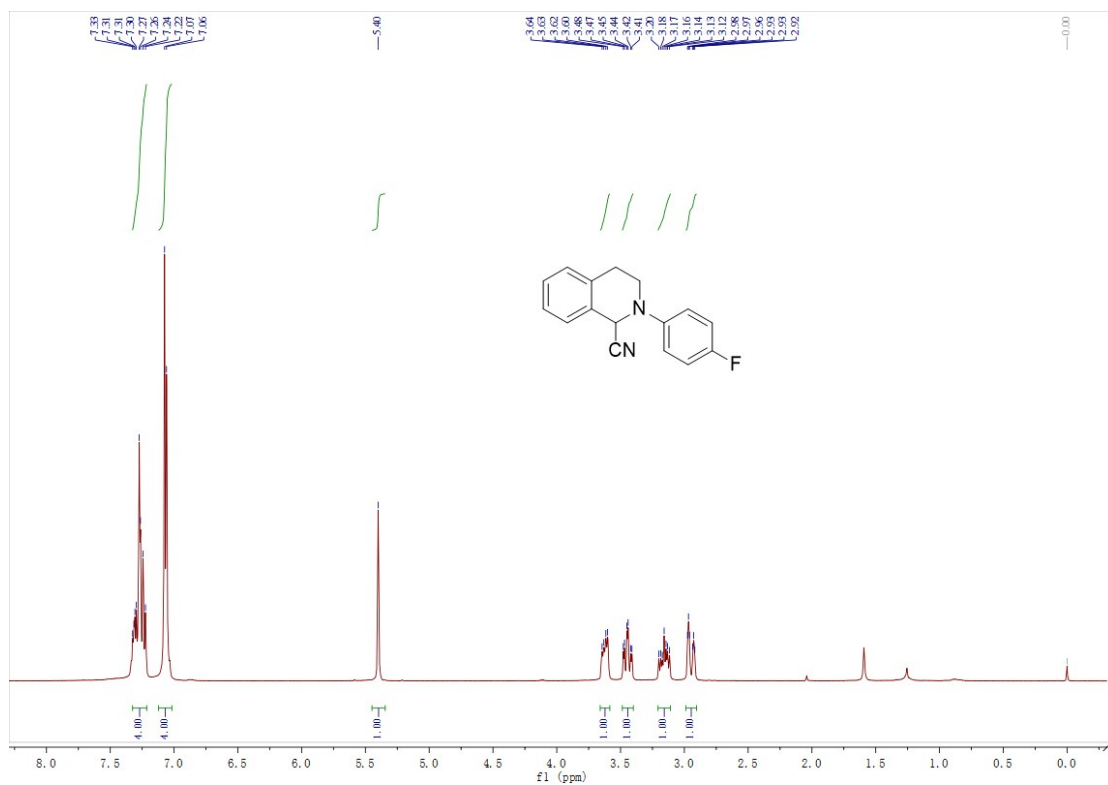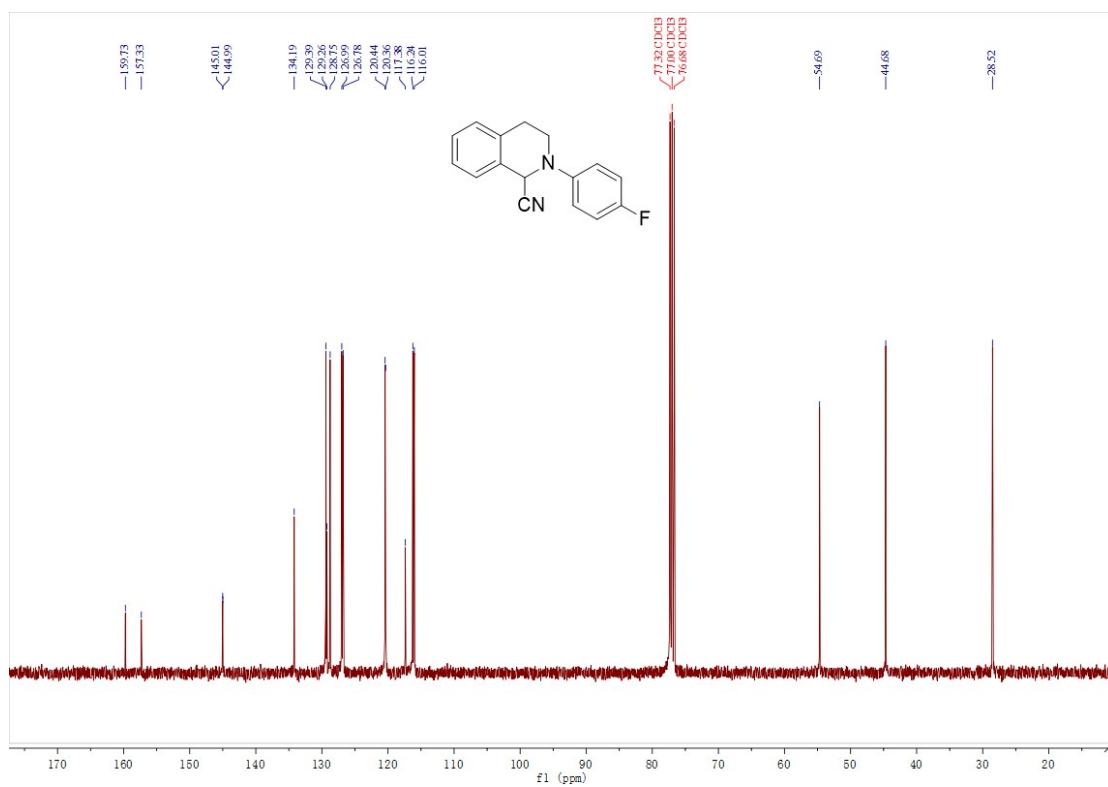

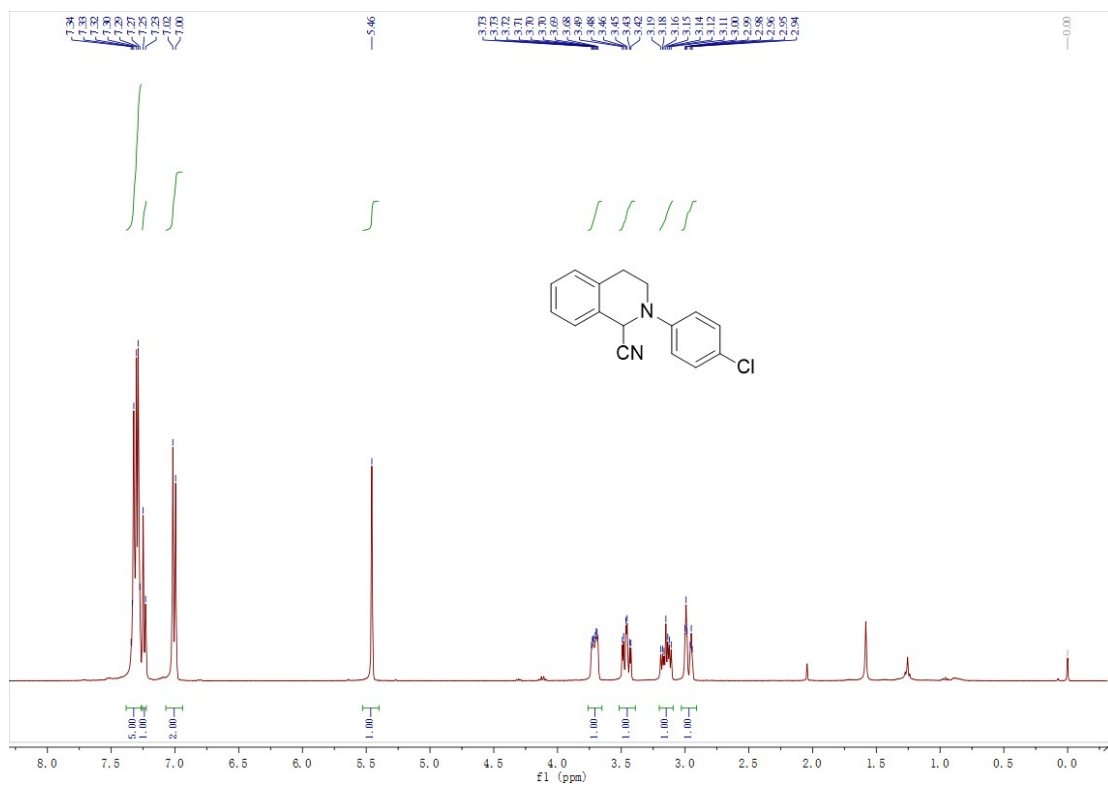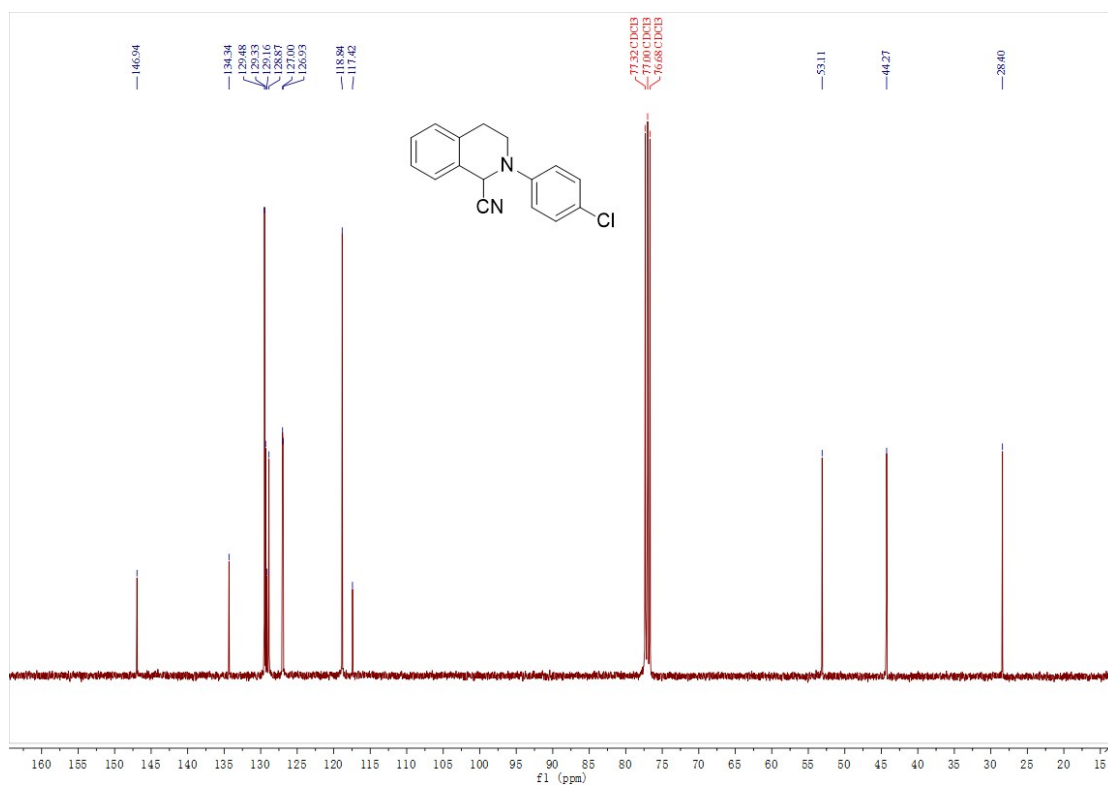

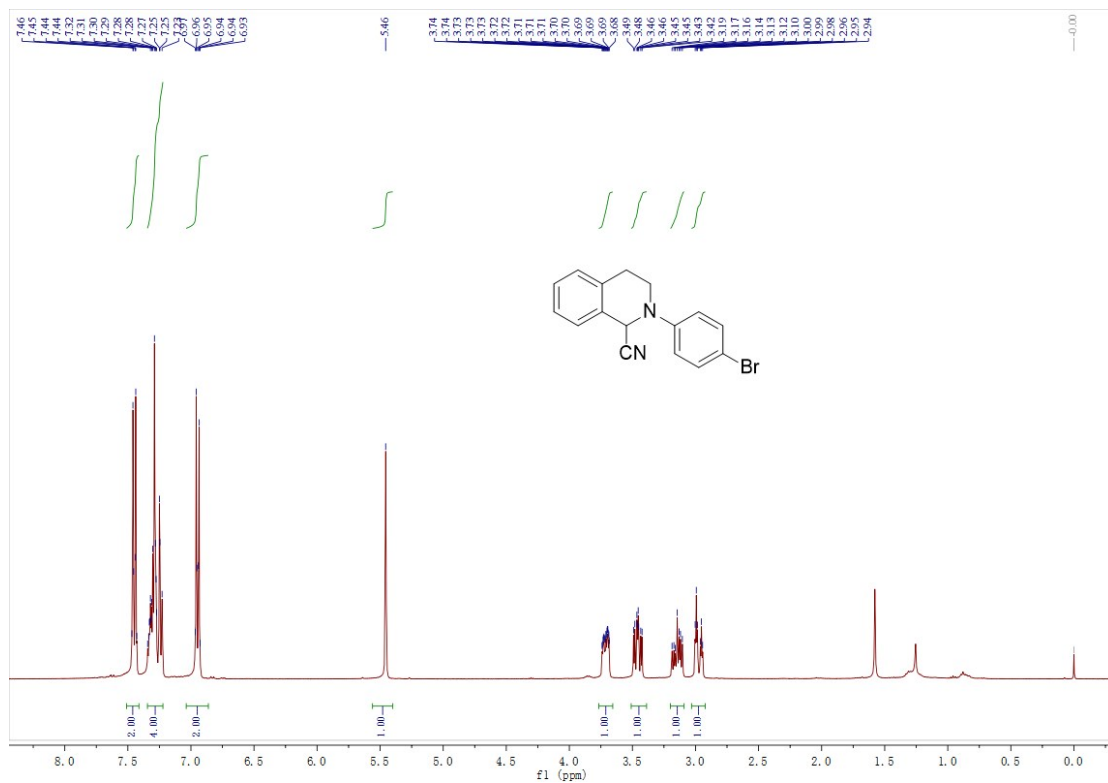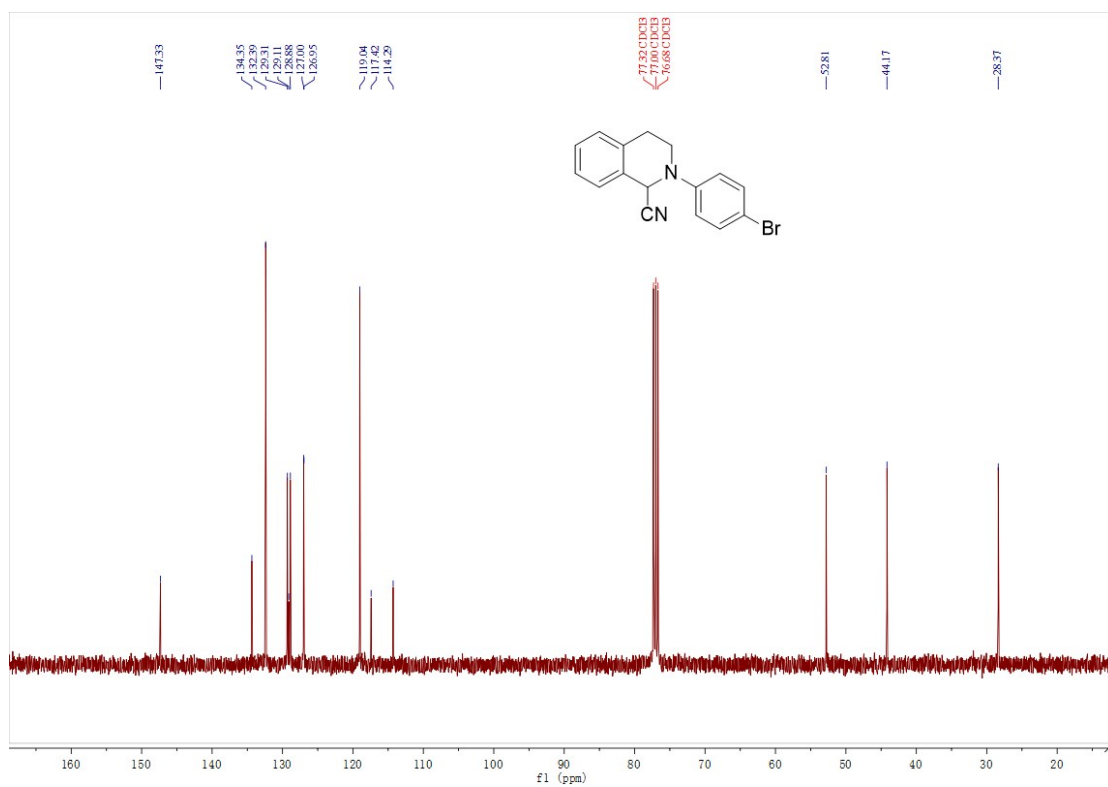

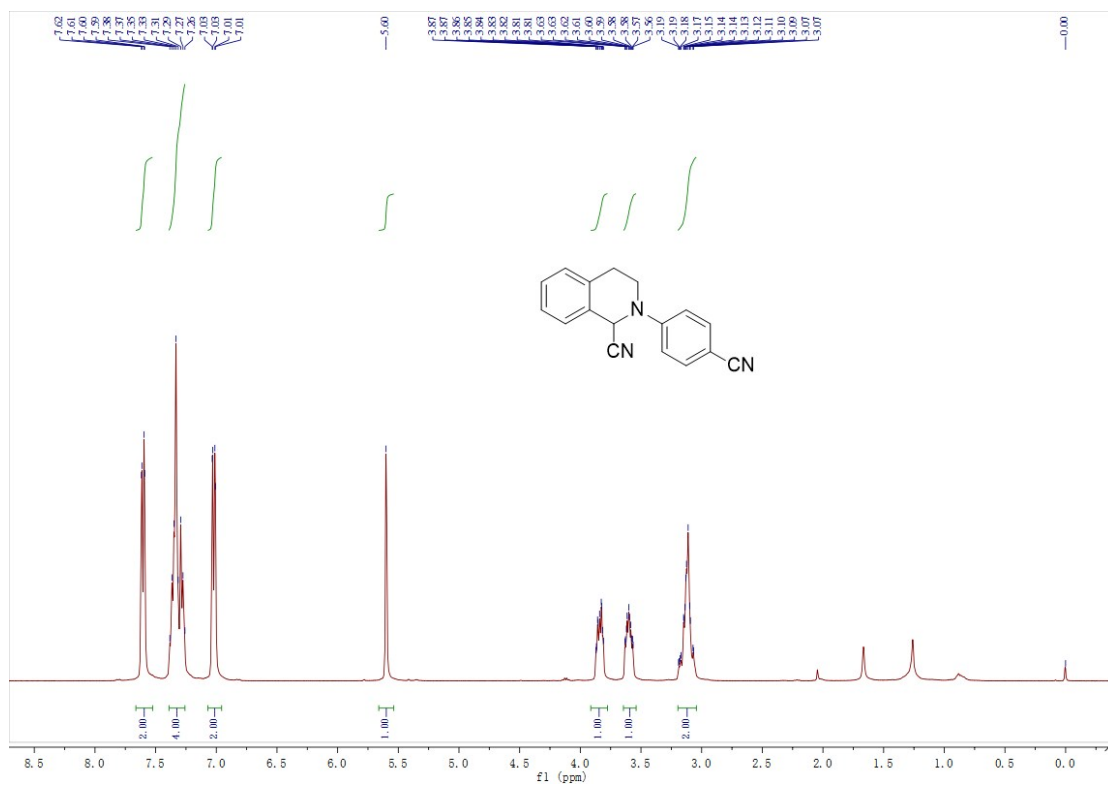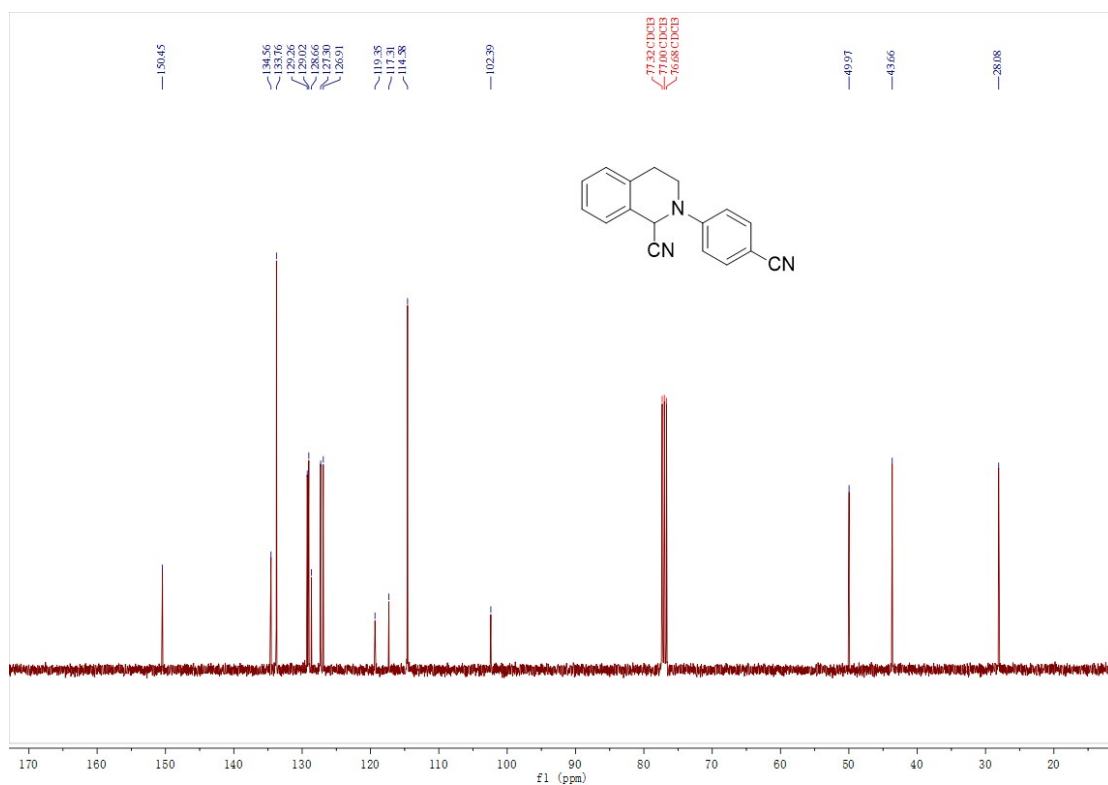

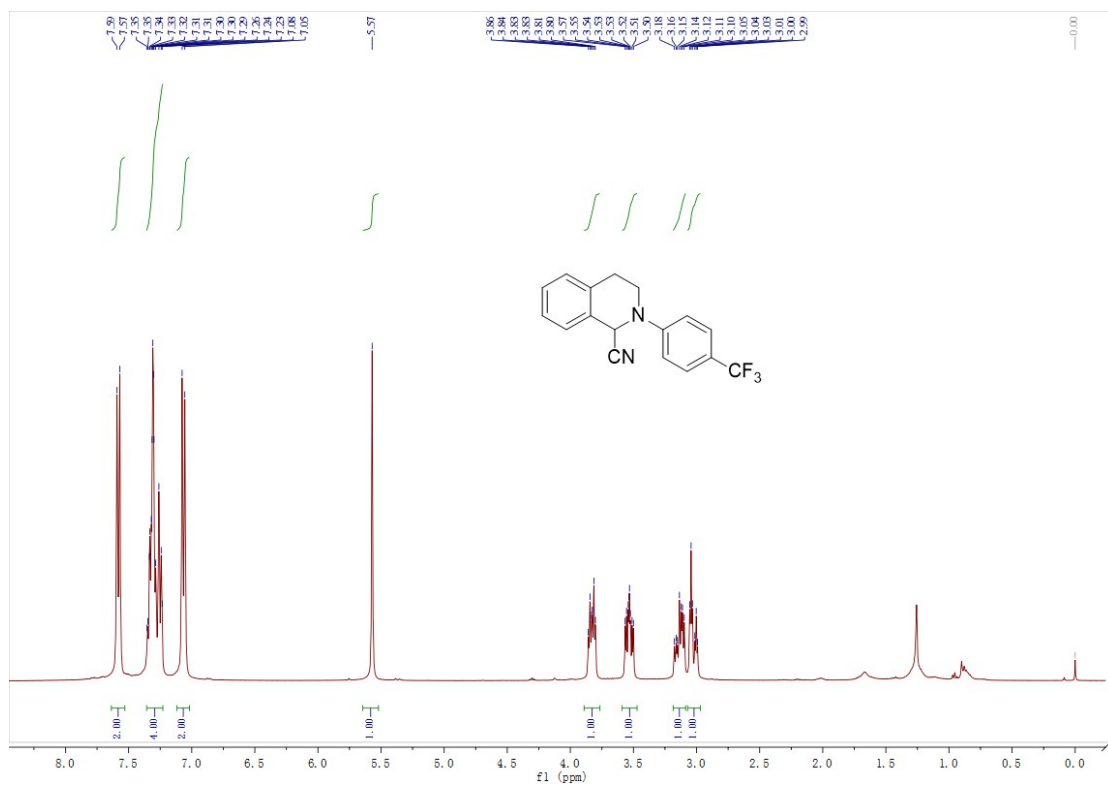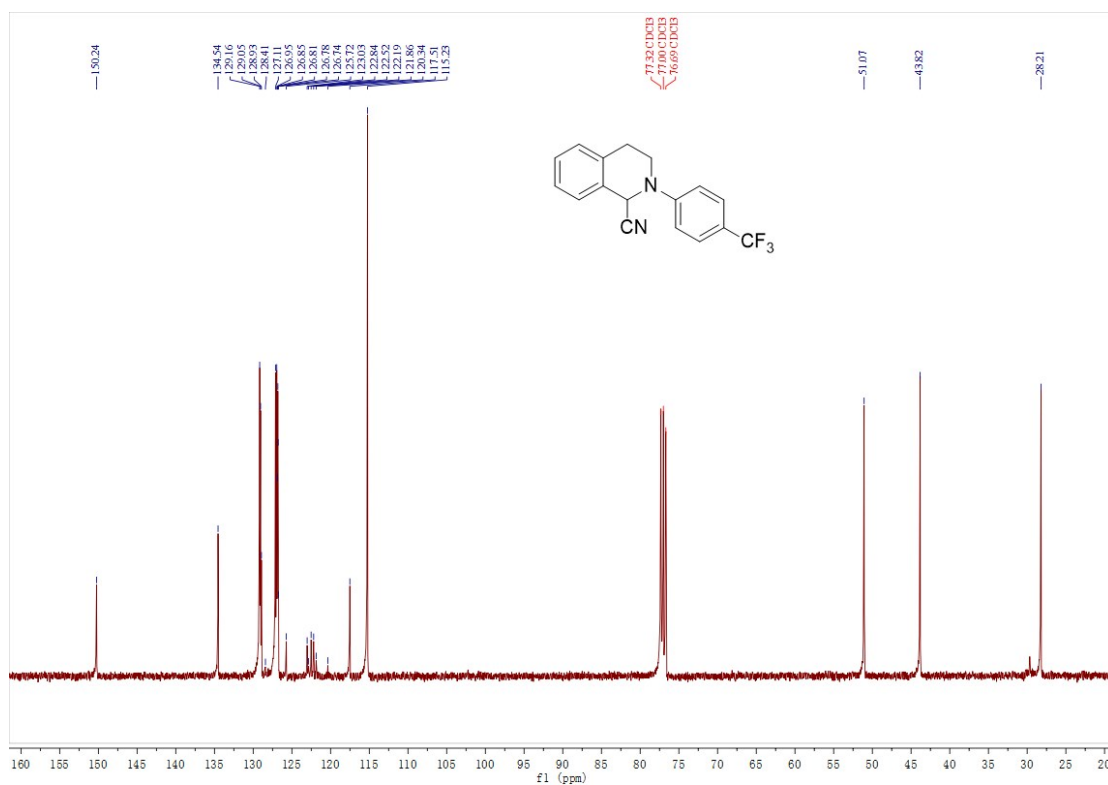



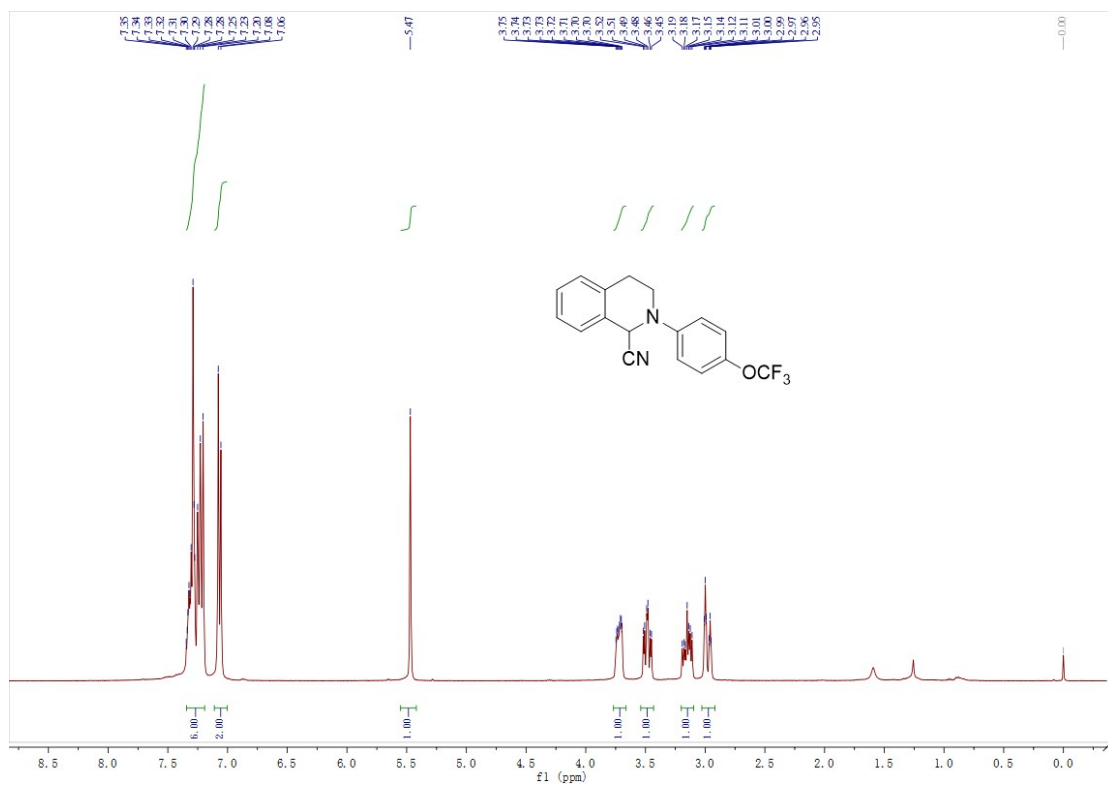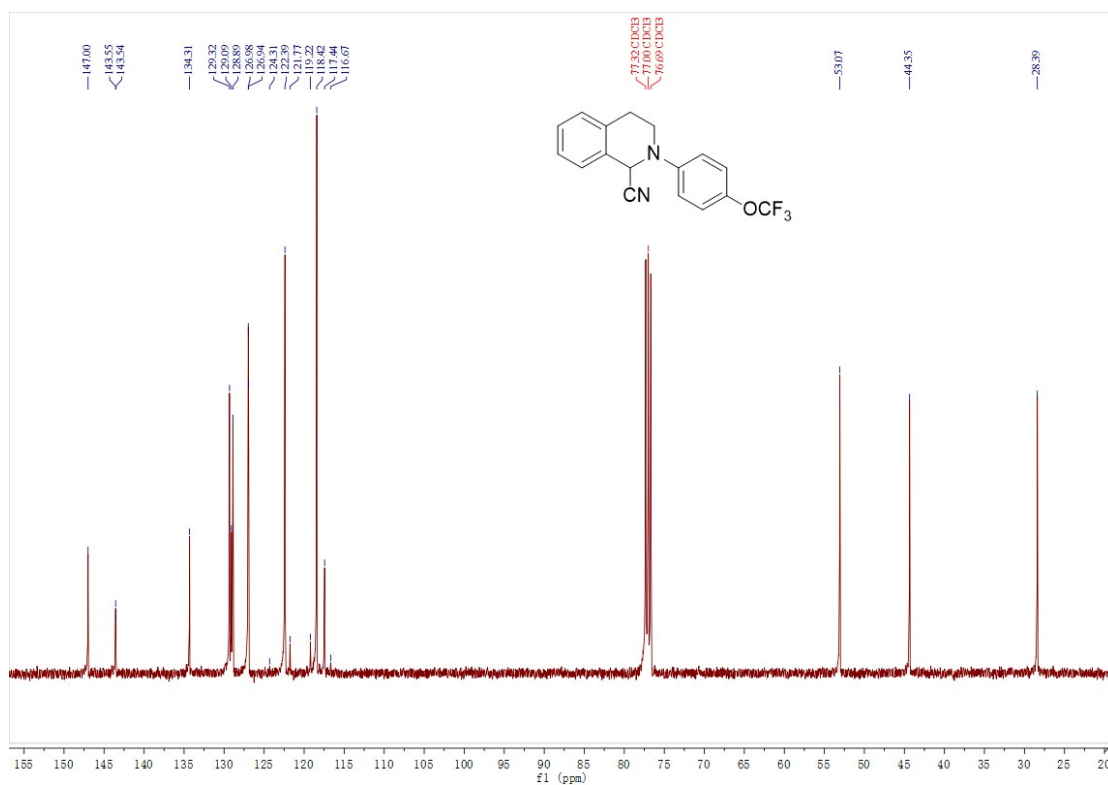

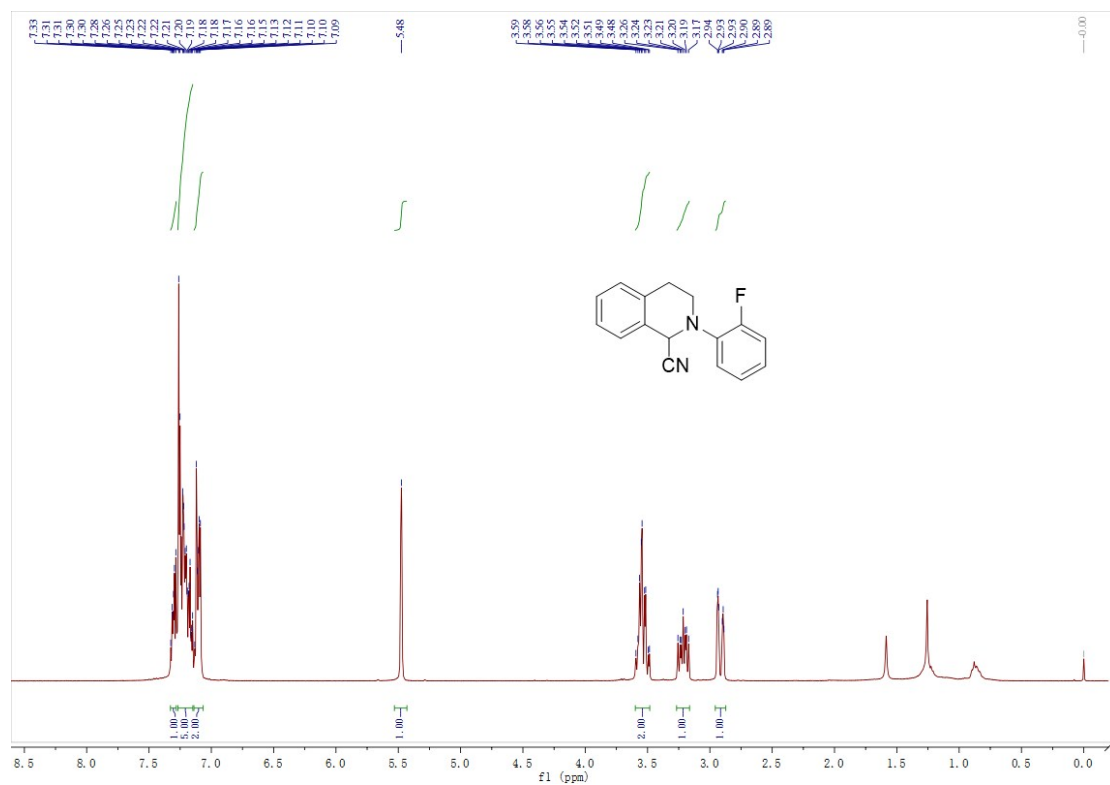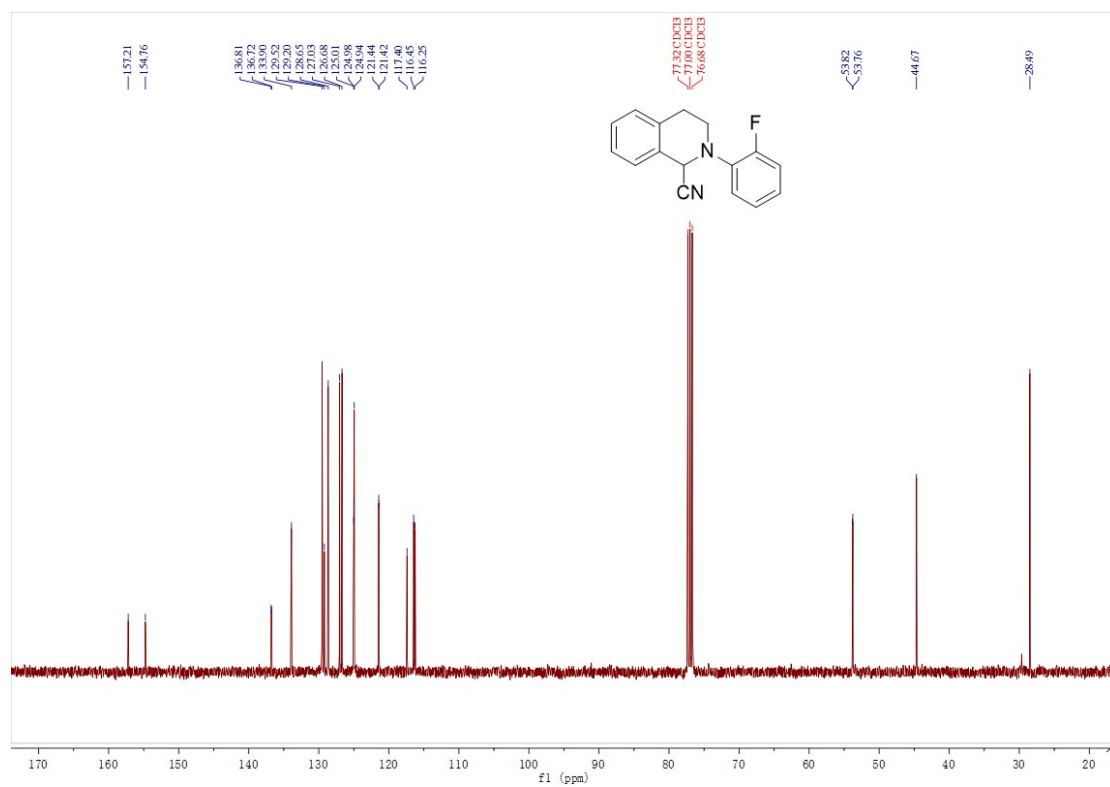

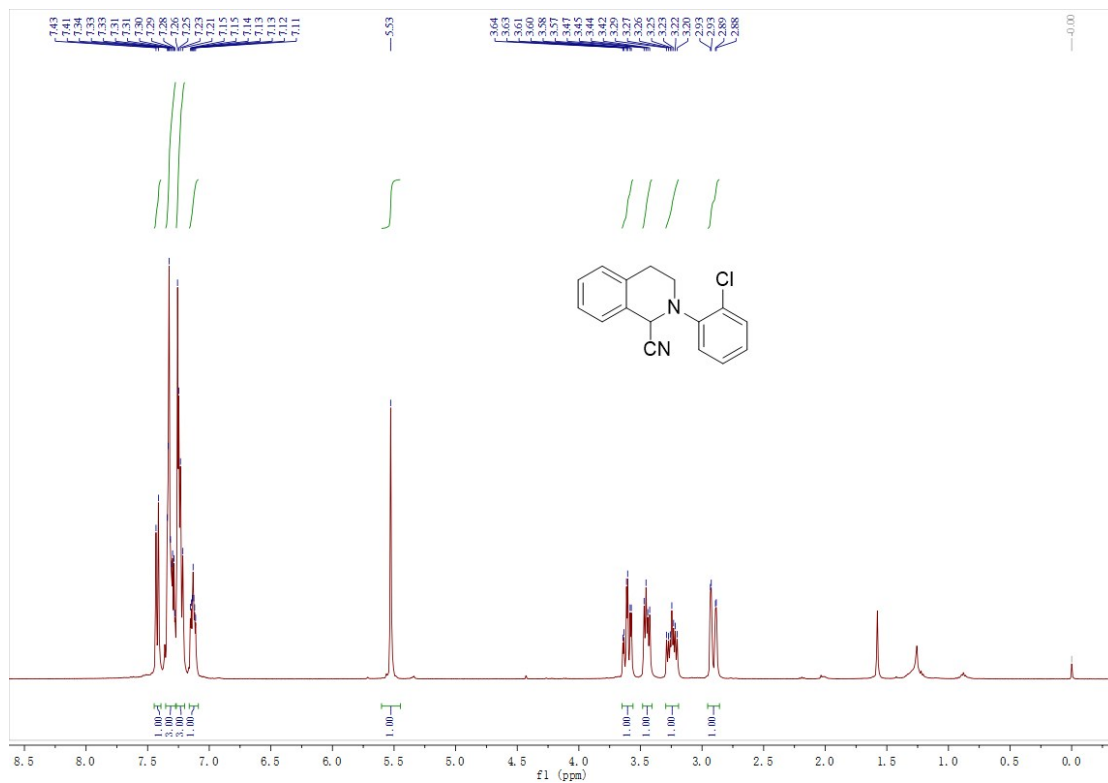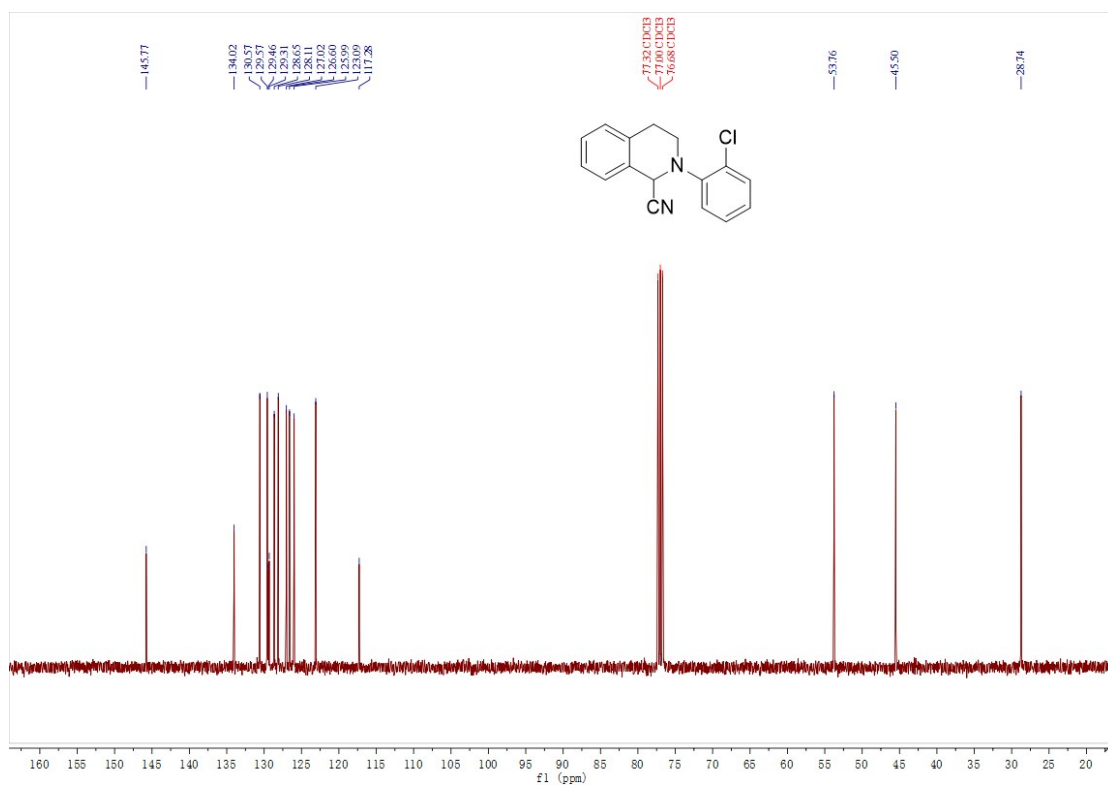

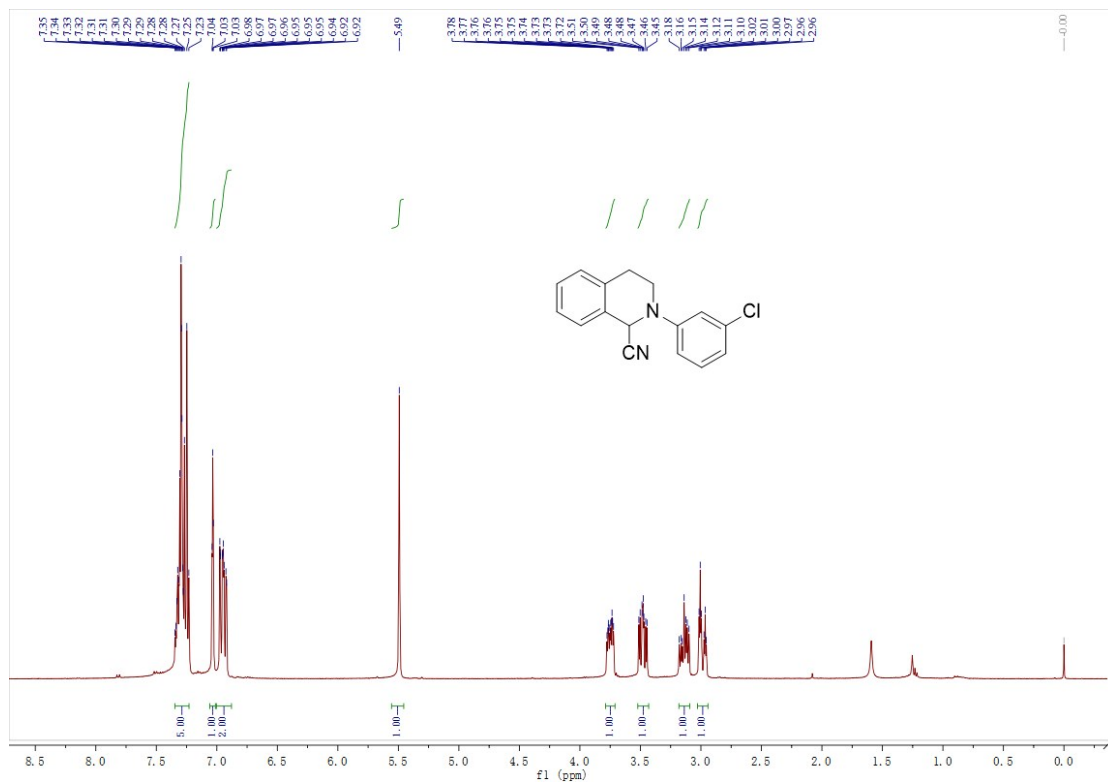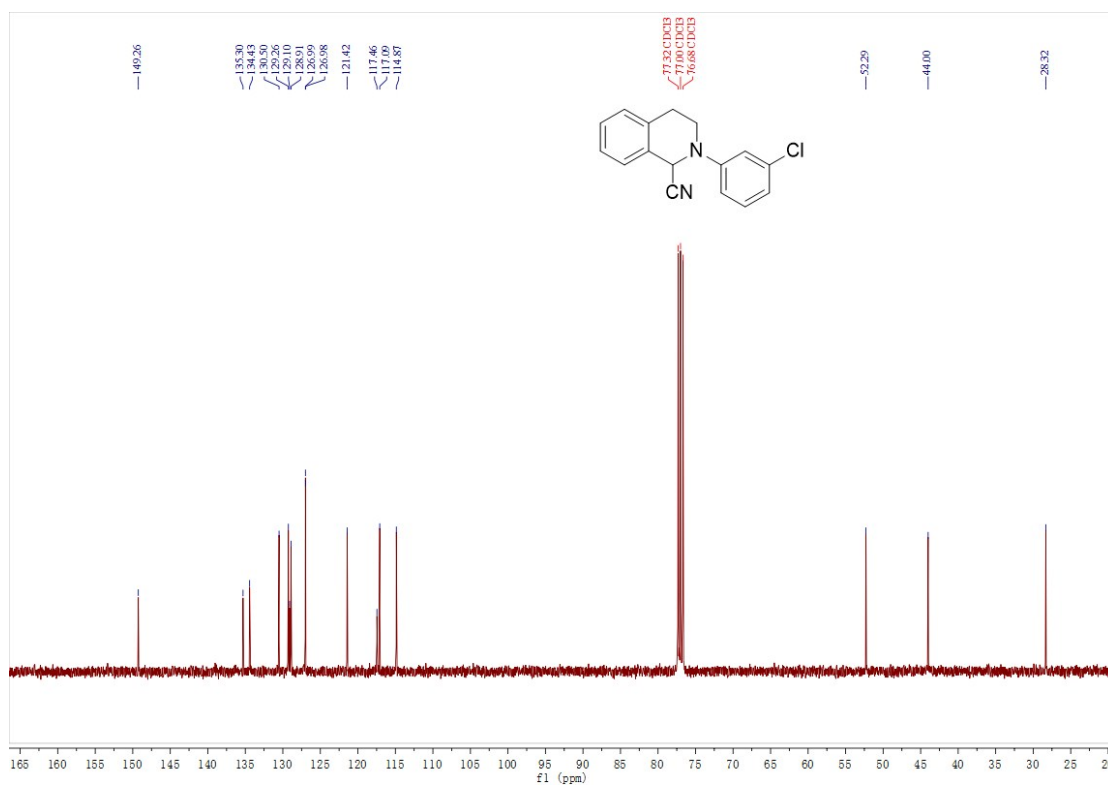

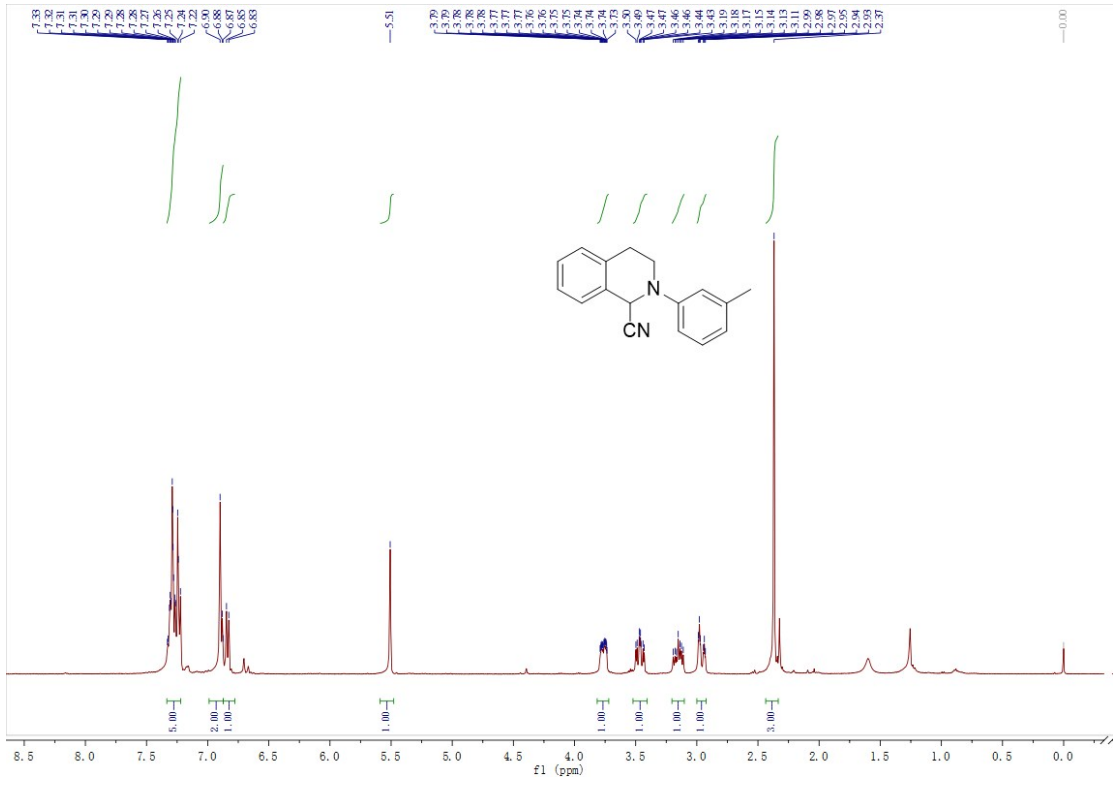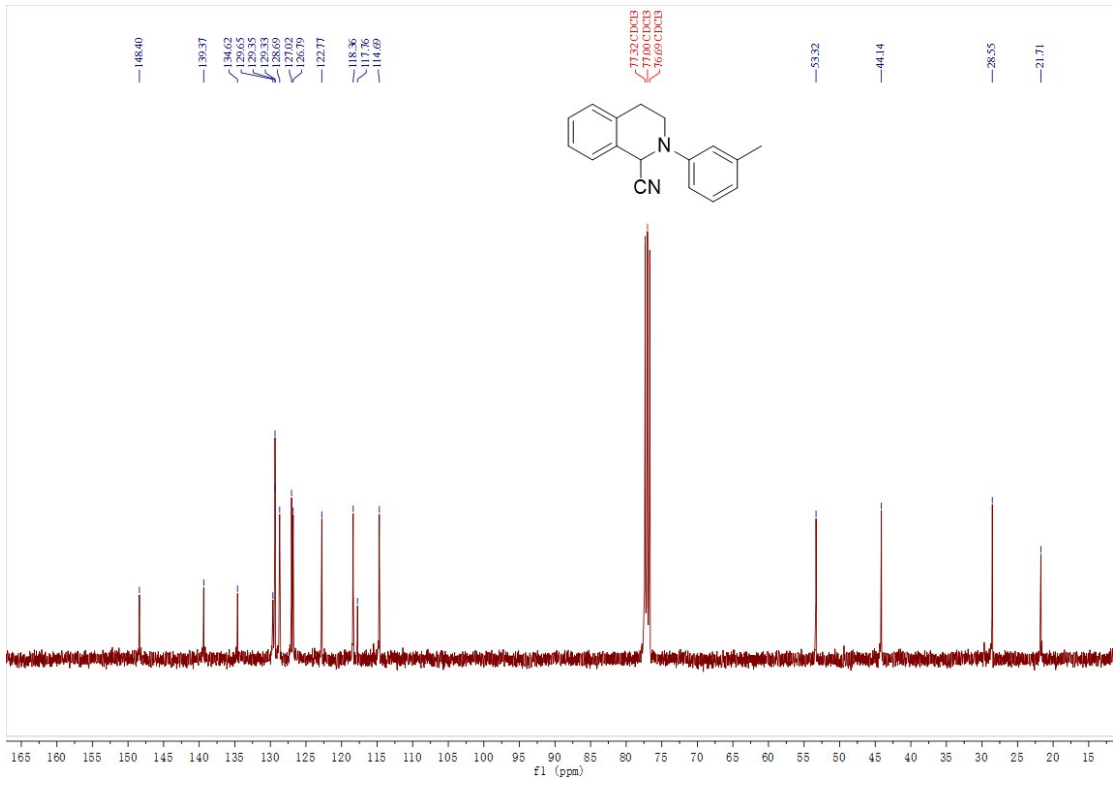

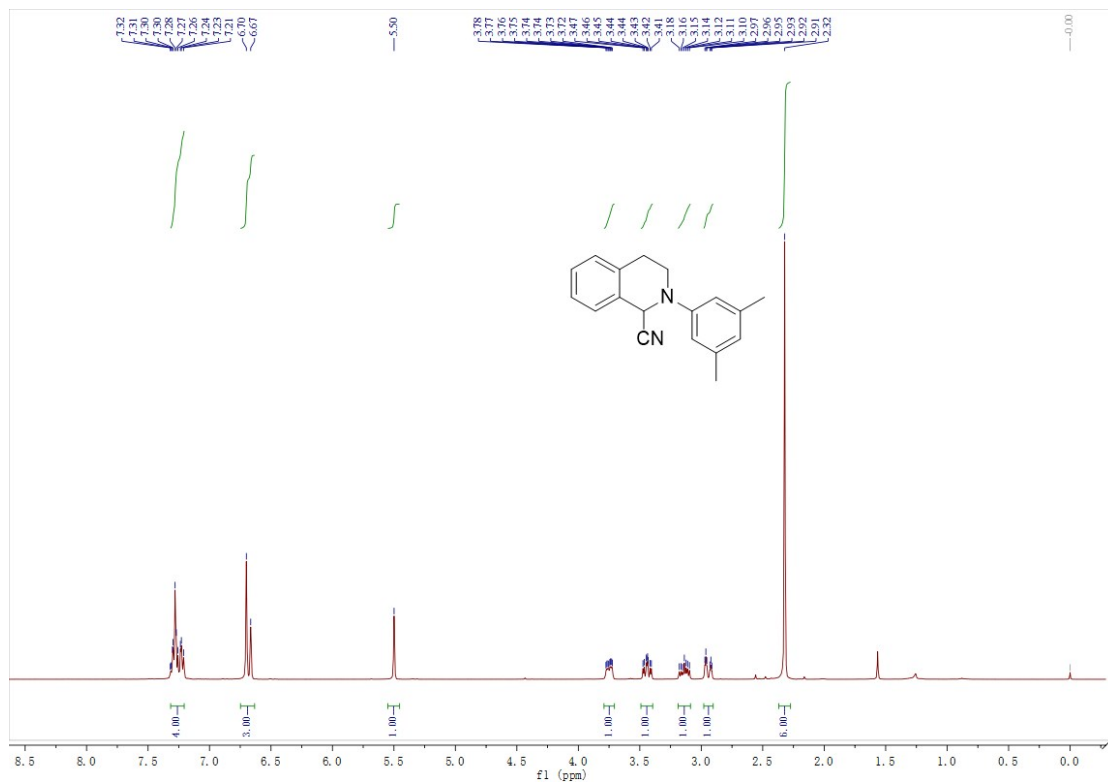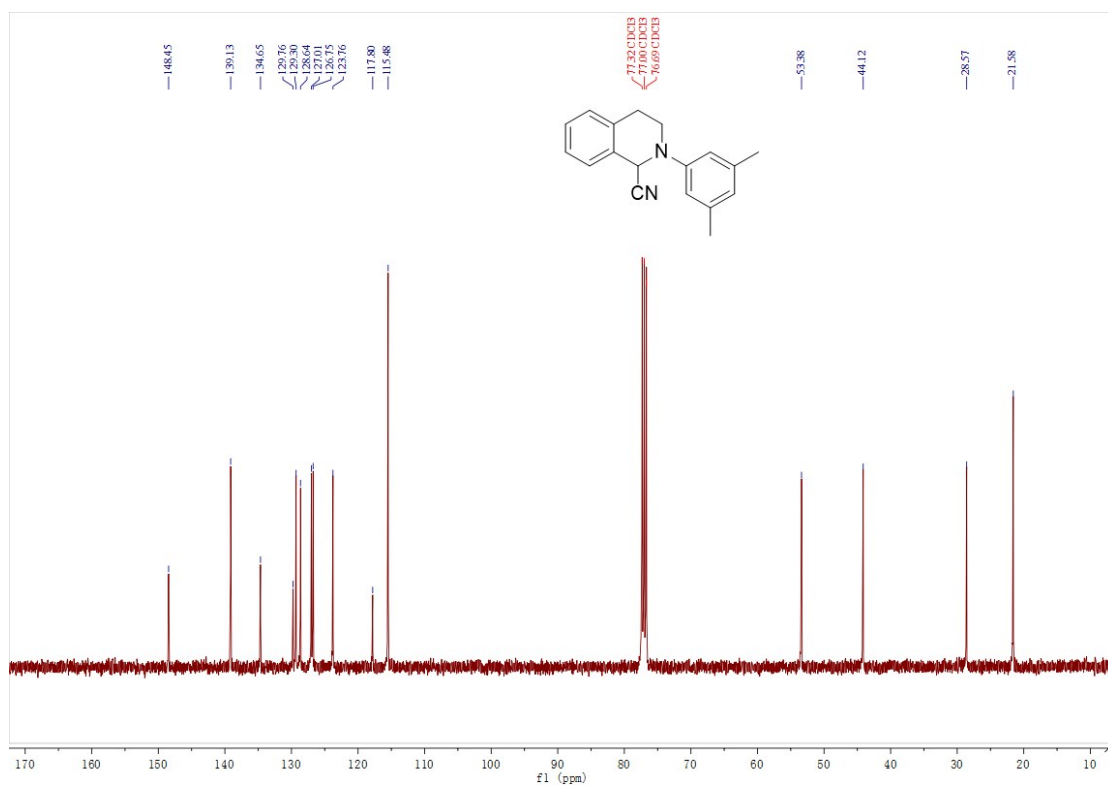

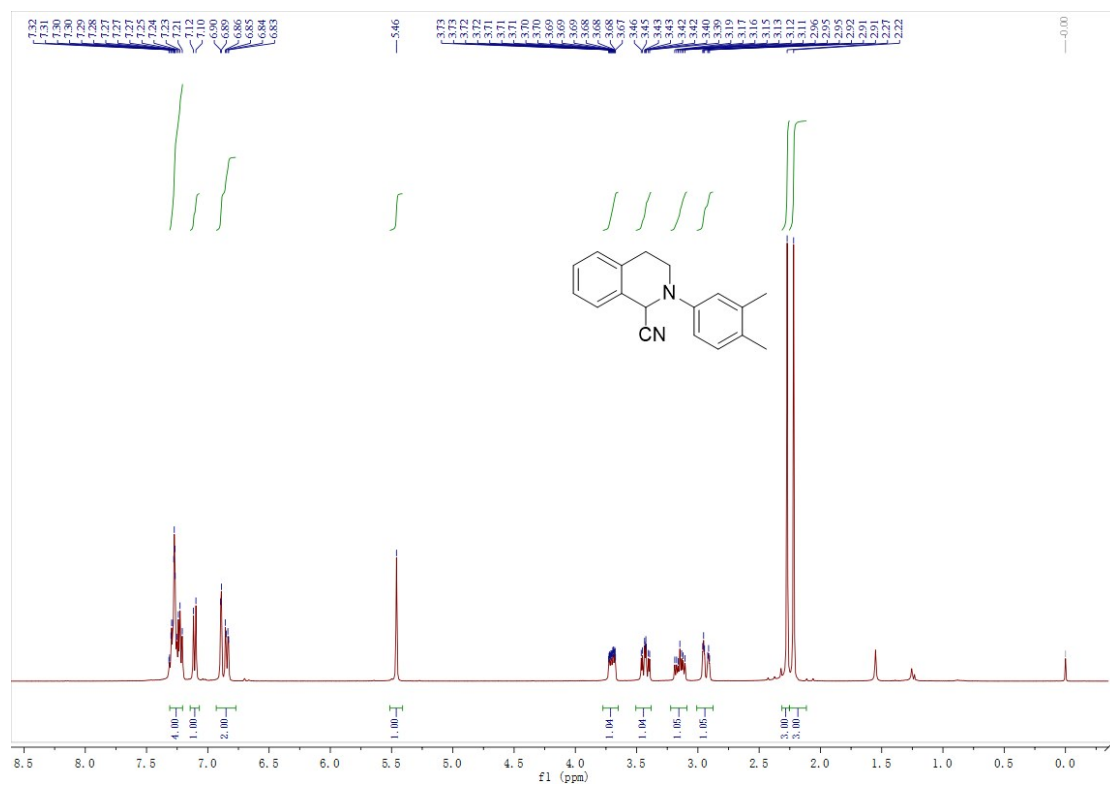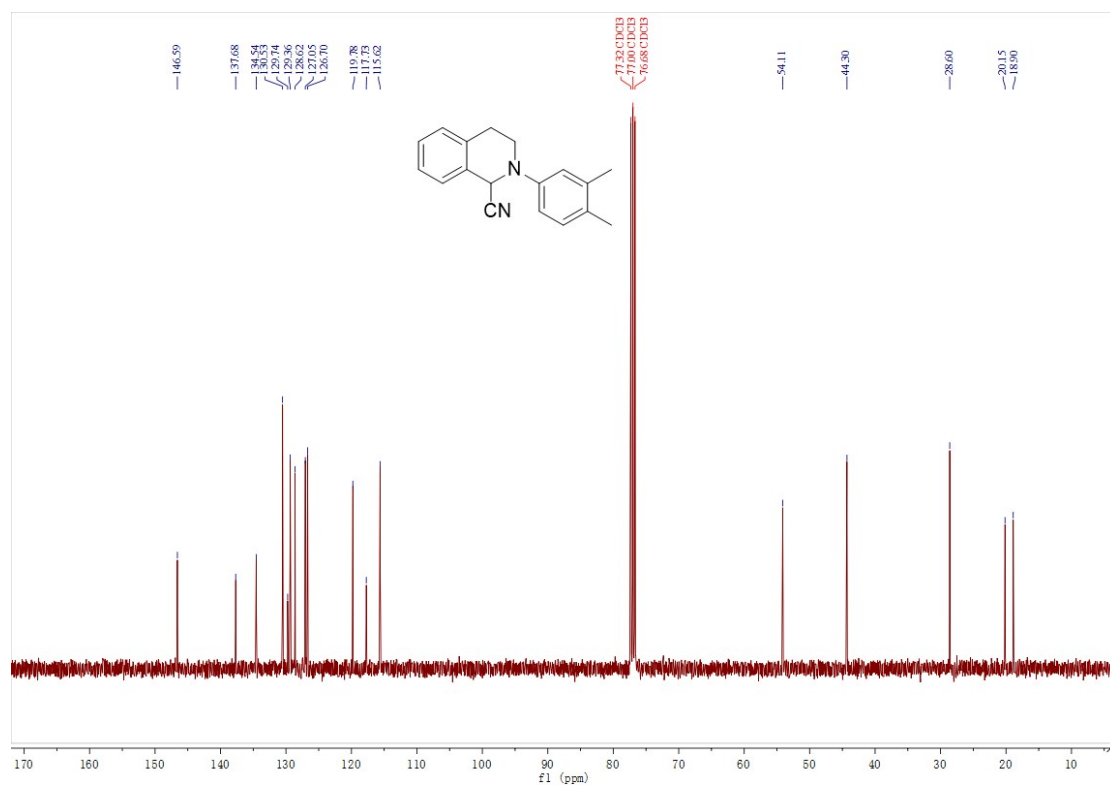

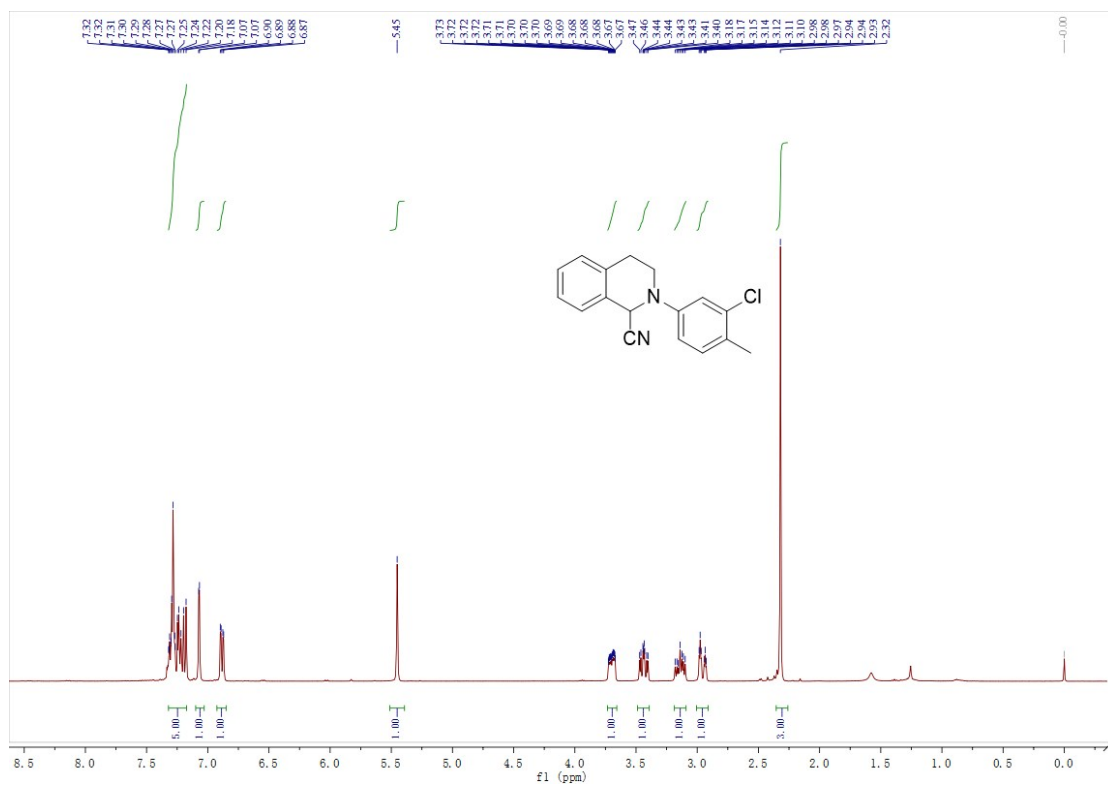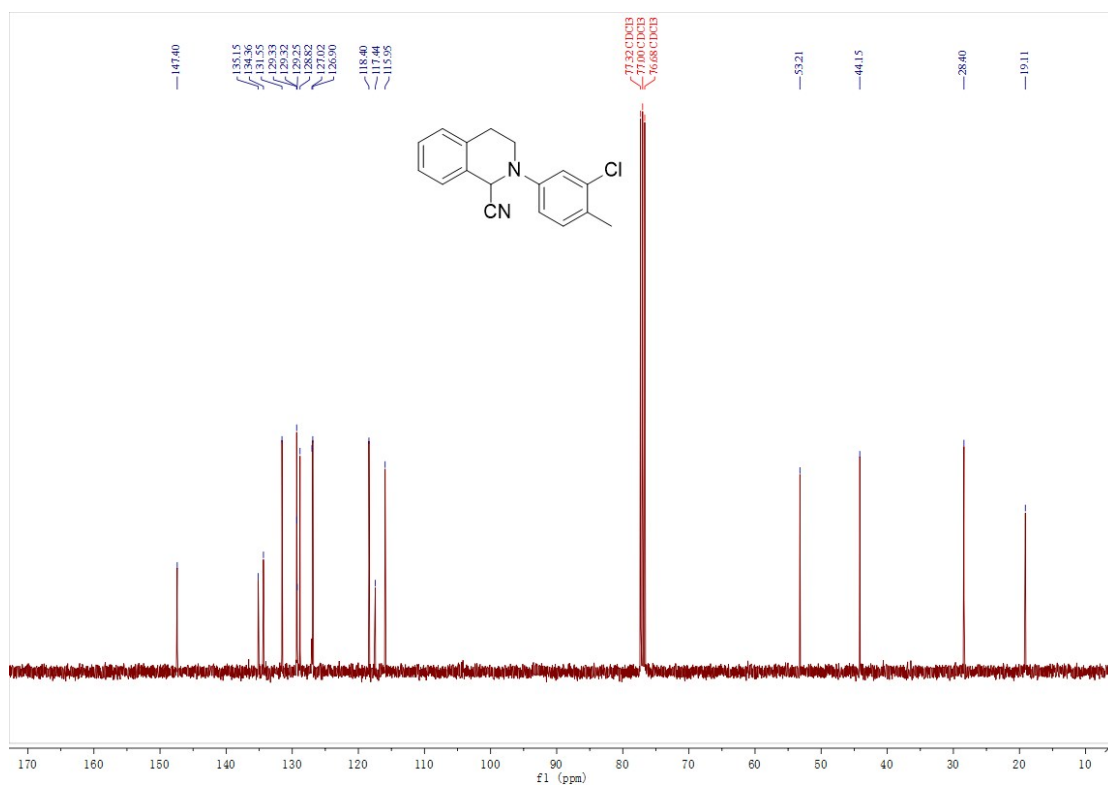

Supplement: c9ra06120g1.pdf [file c9ra06120g1.pdf]
